# Supplementary material for: A hydrazine-directed Rh(iii) catalyzed (4+2) annulation with sulfoxonium ylides: synthesis and photophysical properties of dihydrocinnolines
Source: Royal Society of Chemistry journal article supplement (doi:10.1039/d1cc06353g), 2022-01-01

## Supporting Information

### **Hydrazine-Directed Rh(III) Catalyzed (4+2) Annulation with Sulfoxonium Ylides: Synthesis and Photophysical Properties of Dihydrocinnolines**

Pothapragada S. K. Prabhakar Ganesh, Perumal Muthuraja, Purushothaman Gopinath\*

Department of Chemistry, Indian Institute of Science Education and Research (IISER) Tirupati, Tirupati 517507, India, E-mail: [gopi@iisertirupati.ac.in](mailto:gopi@iisertirupati.ac.in).

## Table of Contents

|                                                       |         |
|-------------------------------------------------------|---------|
| 1. General information.....                           | S3      |
| 2. Experimental section.....                          | S4-S11  |
| 3. Analytical data of compounds.....                  | S12-S22 |
| 4. References.....                                    | S23     |
| 5. $^1\text{H}$ and $^{13}\text{C}$ NMR spectra ..... | S24-S66 |

## 1. General Information:

All chemicals were obtained from commercial sources and were used as received unless otherwise noted. Sulfoxonium ylides<sup>1</sup> and N-Methyl Phenyl hydrazines<sup>2</sup> were synthesized according to literature reports. All the anhydrous solvents required were purchased from Sigma Aldrich. Reactions were monitored using precoated Aluminum supported silica gel 60 F254 TLC (thin layer chromatography) plates (Merck) and are visualized by UV light at 254 nm. The final product was purified using column chromatography (100-200 mesh silica gel purchased from Merck). <sup>1</sup>H NMR (400 MHz), <sup>19</sup>F NMR (376 MHz), and <sup>13</sup>C NMR (101 MHz) spectra were recorded on the Bruker AVANCE NEO 400 MHz spectrometer. Deuterated chloroform, DMSO-*d*<sub>6</sub> were used as solvents, and Chemical shifts (δ) for <sup>1</sup>H and <sup>13</sup>C-NMR spectra are given in ppm relative to tetramethylsilane (TMS) [δ 7.27 for <sup>1</sup>H (chloroform-*d*), δ 77.0 for <sup>13</sup>C (chloroform-*d*); δ 2.50 for <sup>1</sup>H (DMSO-*d*<sub>6</sub>), δ 39.52 for <sup>13</sup>C (DMSO-*d*<sub>6</sub>)], <sup>19</sup>F-NMR spectra are not externally calibrated and chemical shifts is given relative to CCl<sub>3</sub>F as received from the automatic data processing. Abbreviations used in the NMR follow-up experiments: br, broad; s, singlet; d, doublet; t, triplet; q, quartet; sep, septet; dd, doublet of doublet; m, multiplet. All fluorescent spectra were recorded by using an FP-8500 spectrofluorometer (JASCO) and Cary 3500UV-Visible spectrometer (Agilent). High resolution mass spectra (HRMS) was obtained from Orbitrap Elite Hybrid Ion Trap-Orbitrap (ThermoFischer scientific, Newington, NH, USA) Mass Spectrometer in electrospray ionization mode (ESI+).

## 2. Experimental Section:

### 2.1. General procedure for the optimization

**Table S1:** Optimization of reaction conditions.<sup>a</sup>

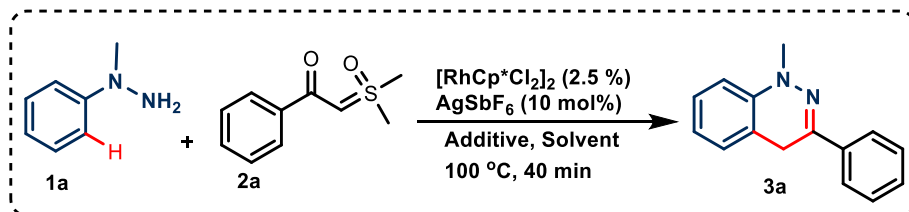

| Entry           | Additive (equiv)                | Solvent | Yield (%) <sup>b</sup> |
|-----------------|---------------------------------|---------|------------------------|
| 1               | NaOAc (1.0)                     | ACN     | 40                     |
| 2               | NaOAc (1.0)                     | MeOH    | 20                     |
| 3               | NaOAc (1.0)                     | TFE     | trace                  |
| 4               | NaOAc (1.0)                     | Dioxane | trace                  |
| 5 <sup>c</sup>  | NaOAc (1.0)                     | DCE     | 55                     |
| 6 <sup>d</sup>  | NaOAc (1.0)                     | DCE     | 61                     |
| 7 <sup>e</sup>  | NaOAc (1.0)                     | DCE     | 72 (78)                |
| 8 <sup>f</sup>  | NaOAc (1.0)                     | DCE     | trace                  |
| 9 <sup>g</sup>  | NaOAc (1.0)                     | DCE     | n.d                    |
| 10 <sup>h</sup> | NaOAc (1.0)                     | DCE     | n.d                    |
| 11 <sup>i</sup> | NaOAc (1.0)                     | DCE     | n.d                    |
| 12              | LiOAc (1.0)                     | DCE     | 40                     |
| 13              | KOAc (1.0)                      | DCE     | 50                     |
| 14              | $\text{Cu}(\text{OAc})_2$ (1.0) | DCE     | 15                     |
| 15              | $\text{Zn}(\text{OAc})_2$ (0.2) | DCE     | 70                     |
| 16              | $\text{Zn}(\text{OAc})_2$ (0.5) | DCE     | 82 (87)                |
| 17              | $\text{Zn}(\text{OAc})_2$ (0.7) | DCE     | 73                     |
| 18              | AcOH (1.0)                      | DCE     | 31                     |
| 19              | PivOH (1.0)                     | DCE     | 45                     |
| 20              | —                               | DCE     | 16                     |

<sup>a</sup>Reaction conditions: **1a** (0.25 mmol) and **2a** (0.37 mmol),  $[\text{RhCp}^*\text{Cl}_2]_2$  (2.5 mol %),  $\text{AgSbF}_6$  (10 mol %) and additive in solvent (1.2 mL) at 100 °C for 40 min. Yields are based on crude <sup>1</sup>H NMR (internal standard: 1,1,2,2-tetrachloroethane).

<sup>c</sup>Reaction run at 80 °C. <sup>d</sup>Reaction run at 90 °C. <sup>e</sup>Reaction run at 100 °C.

<sup>f</sup>Reaction with  $[\text{RuCl}_2(\text{p-cymene})]_2$  (5 mol %). <sup>g</sup>Reaction with  $[\text{CoCp}^*(\text{CO}_2)\text{I}_2]$ . <sup>h</sup>Without  $\text{AgSbF}_6$ . <sup>i</sup>Reaction without  $[\text{RhCp}^*\text{Cl}_2]_2$  (2.5 mol %).

To a 15 mL dry pressure tube containing a Teflon coated stir bar were added N-methyl phenylhydrazine **1a** (10 mg, 0.082 mmol), sulfoxonium ylide **2a** (24 mg, 0.123 mmol),  $[\text{Cp}^*\text{RhCl}_2]_2$  catalyst (1.26 mg, 2.5 mol %),  $\text{AgSbF}_6$  (2.8 mg, 10 mol%), additive and the corresponding

solvent. The tube was then sealed after flushing with argon and placed on a preheated oil bath at 100 °C. The reaction mixture was then stirred at the same temperature for 40 min. After completion of the reaction (monitored by TLC), the reaction mixture was cooled to room temperature, diluted with DCM and solvents removed under reduced pressure. The crude products was analyzed on <sup>1</sup>H NMR to find the yield.

## 2.2. General procedure for the preparation of compounds 3a-3s, 4a-4m & 6a-6d.

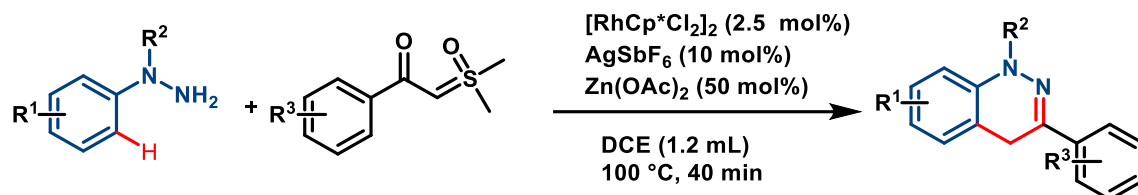

To a 15 ml of pressure seal tube containing a Teflon coated stir bar were added the corresponding N-alkyl aryl hydrazine derivative (1 equiv, 0.25 mmol), sulfoxonium ylide (1.5 equiv, 0.37 mmol), Zn(OAc)<sub>2</sub> (22.5 mg, 0.12 mmol), [Cp\*RhCl<sub>2</sub>]<sub>2</sub> (3.86 mg, 2.5 mol %), AgSbF<sub>6</sub> (8.6 mg, 10 mol%) followed by the addition of DCE (1.2 mL) as solvent. The tube was then sealed after flushing with argon and placed on a preheated oil bath at 100 °C. The reaction mixture was then stirred at the same temperature for 40 min. After completion of the reaction (monitored by TLC), the reaction mixture was cooled to room temperature, diluted with DCM and the solvents removed under reduced pressure. The crude products were then purified on Column chromatography with 100-200 mesh size silica gel using ethyl acetate/hexane solvent system to afford the desired products.

## 2.3. Scale up reaction

Same procedure as described in **section 2b** was followed for the 5.0 mmol scale reaction.

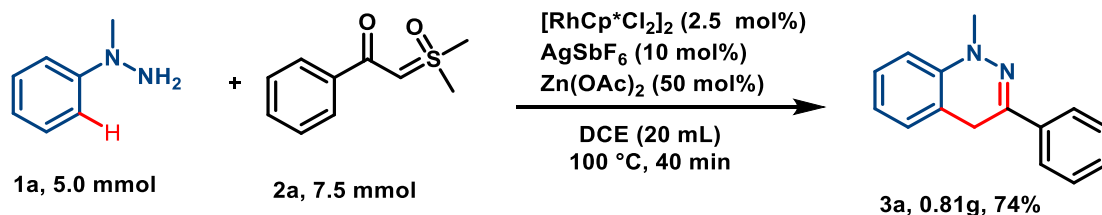

## 2.4. Photophysical properties of compound 3a, 3c, 3j, 3m, 3q, 3r.

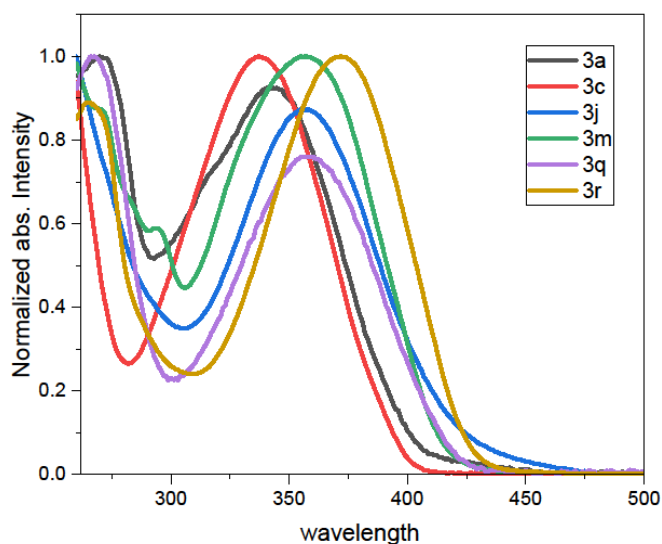

**Figure S1:** Normalized UV absorption of compound **3a**, **3c**, **3j**, **3m**, **3q** and **3r** dispersed in dichloromethane medium ( $1 \times 10^{-5}$  M).

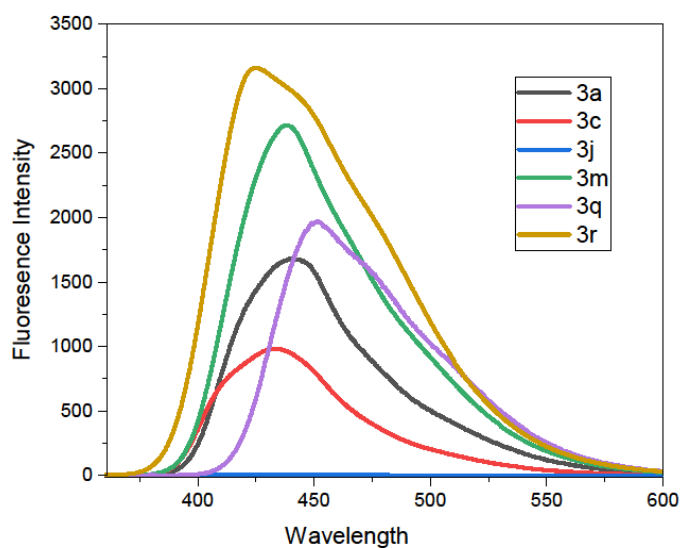

**Figure S2:** Photoluminescent spectra of compound **3a**, **3c**, **3j**, **3m**, **3q** and **3r** dispersed in dichloromethane medium ( $1 \times 10^{-5}$  M).

| Compounds | $\lambda_{abs}$ (nm) <sup>a</sup> | $\lambda_{em}$ (nm) <sup>a,b</sup> | $\Phi_F$ |
|-----------|-----------------------------------|------------------------------------|----------|
| <b>3a</b> | 343                               | 441                                | 0.49     |
| <b>3c</b> | 336                               | 432                                | 0.15     |
| <b>3j</b> | 357                               | 442                                | 0.02     |
| <b>3m</b> | 358                               | 438                                | 0.69     |
| <b>3q</b> | 360                               | 452                                | 0.94     |
| <b>3r</b> | 372                               | 434                                | 0.85     |

<sup>a</sup>. Concentration of  $1 \times 10^{-5}$  M in DCM.

### Measurement of fluorescence quantum yield ( $\Phi_F$ )

Fluorescence quantum yields ( $\Phi_F$ ) of our synthesized dihydrocinnolines derivatives were calculated using 2-aminopyridine (0.1 M H<sub>2</sub>SO<sub>4</sub> solution) as a standard ( $\Phi_F = 0.60$ ). Emission spectra of compounds **3** were recorded from 350 nm to 600 nm with excitation at their absorption maximum. Quantum yields were calculated according to equation (1), in which  $\Phi_{ref}$  is the quantum yield of the reference,  $A_{sample}$  and  $A_{ref}$  are the areas under the emission spectra of the sample **3** and the reference, respectively, and  $OD_{ref}$  and  $OD_{sample}$  are the absorbance of the reference and the sample **3**, respectively, measured at the excitation wavelength;  $n_{sample}$  and  $n_{ref}$  are the refractive indices of the sample **3** and the reference, respectively, in solution.

$$\varphi_{sample} = \varphi_{ref} \left( \frac{A_{sample}}{A_{ref}} \right) \times \left( \frac{OD_{ref}}{OD_{sample}} \right) \times \left( \frac{n_{ref}}{n_{sample}} \right)$$

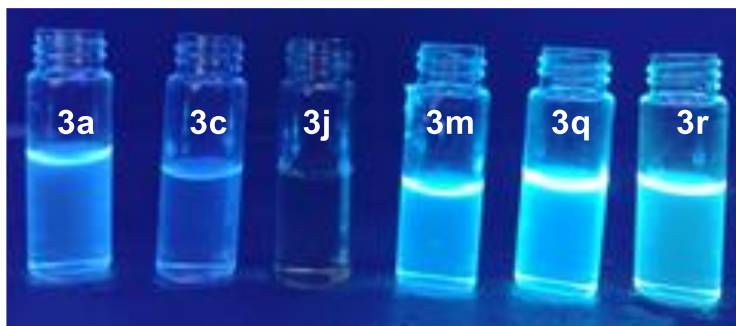

**Figure S3:** Compounds **3** in DCM ( $1 \times 10^{-5}$  M) under UV Irradiation at 365 nm.

## 2.5. Intermolecular Competition Experiment:

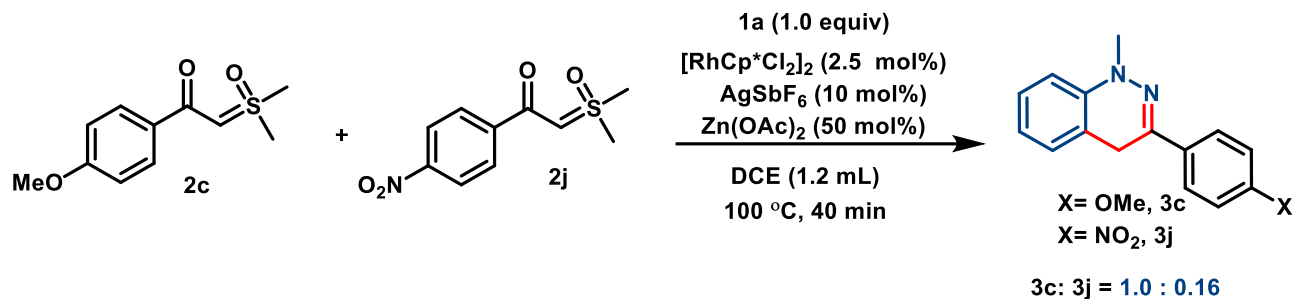

To a dried seal tube containing a Teflon coated stir bar were added **2c** (42 mg, 0.185 mmol), **2j** (45 mg, 0.185 mmol), N-methyl phenyl hydrazine, **1a** (30 mg, 0.25 mmol), [Cp\*RhCl<sub>2</sub>]<sub>2</sub> (3.86 mg, 2.5 mol %), AgSbF<sub>6</sub> (8.45 mg, 10 mol%) followed by DCE (1.2 mL). The tube sealed after flushing with argon and placed with preheated oil bath at 100 °C, and the reaction mixture was stirred at the same temperature for 40 min. After completion of the reaction (monitored by TLC), the reaction mixture was cooled to room temperature, diluted with DCM and solvent removed under reduced pressure. The crude products were purified on Column chromatography on 100-200 silica gel and ratio of products **3c** and **3j** was measured by <sup>1</sup>H NMR analysis which was found by **1.0:0.16**.

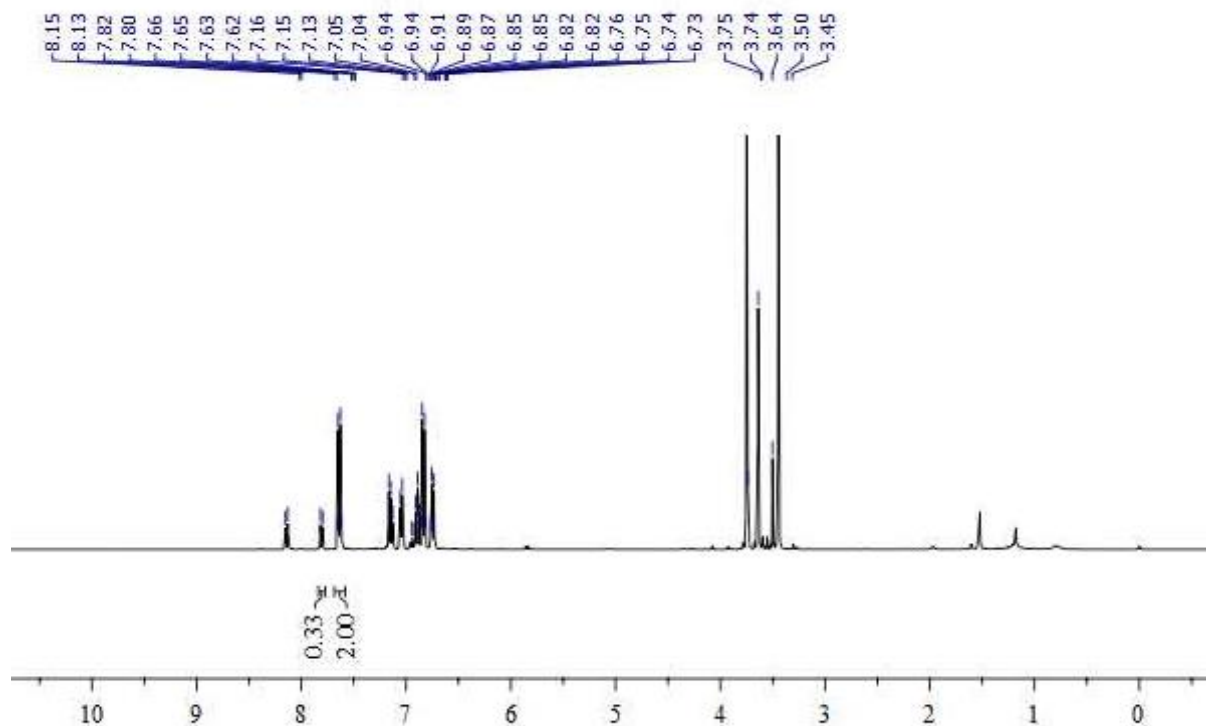



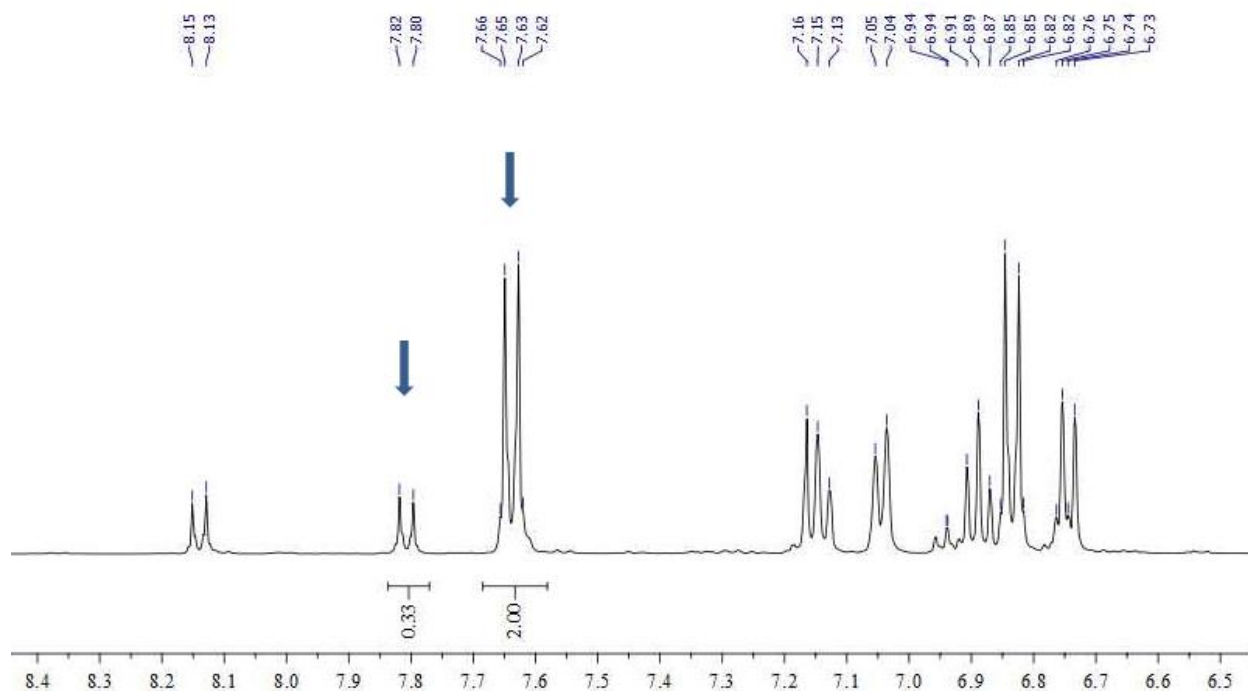

**Figure S4.**  $^1\text{H}$  NMR for intermolecular competition experiment between **3c** and **3j**.

## 2.6 Kinetic Isotope Effect Experiments:

### a) Parallel experiment:

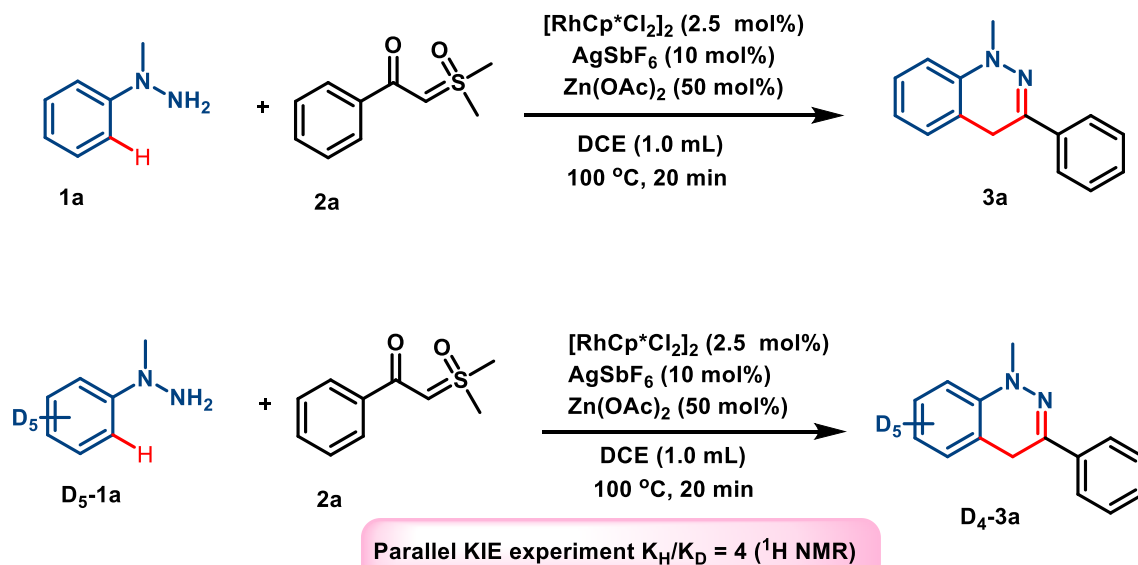

N-methyl phenyl hydrazine **1a** (20 mg, 0.16 mmol) and N-methyl phenyl hydrazine **D<sub>5</sub>-1a** (21 mg, 0.16 mmol) were added to the two separate seal tubes with magnetic stir bar followed by sulfoxonium ylide, **2a** (48 mg, 0.25 mmol),  $[\text{Cp}^*\text{RhCl}_2]_2$  catalyst (2.5 mg, 2.5 mol %),  $\text{AgSbF}_6$

(5.5 mg, 10 mol%) and DCE (1.0 mL) in both the test tubes. The tube was then sealed after flushing with argon and placed in a preheated oil bath at 100 °C and the reaction mixture was stirred at the same temperature for 20 min. The reaction mixture was then cooled to room temperature, diluted with DCM and the solvents were then removed under reduced pressure. The crude products were purified on column chromatography on 100-200 silica gel to afford the desired **3a** and **[D<sub>4</sub>]-3a**. The KIE value for parallel experiment was found to be 4.0. ( $K_H/K_D = 4$ ) based on the <sup>1</sup>H NMR analysis.

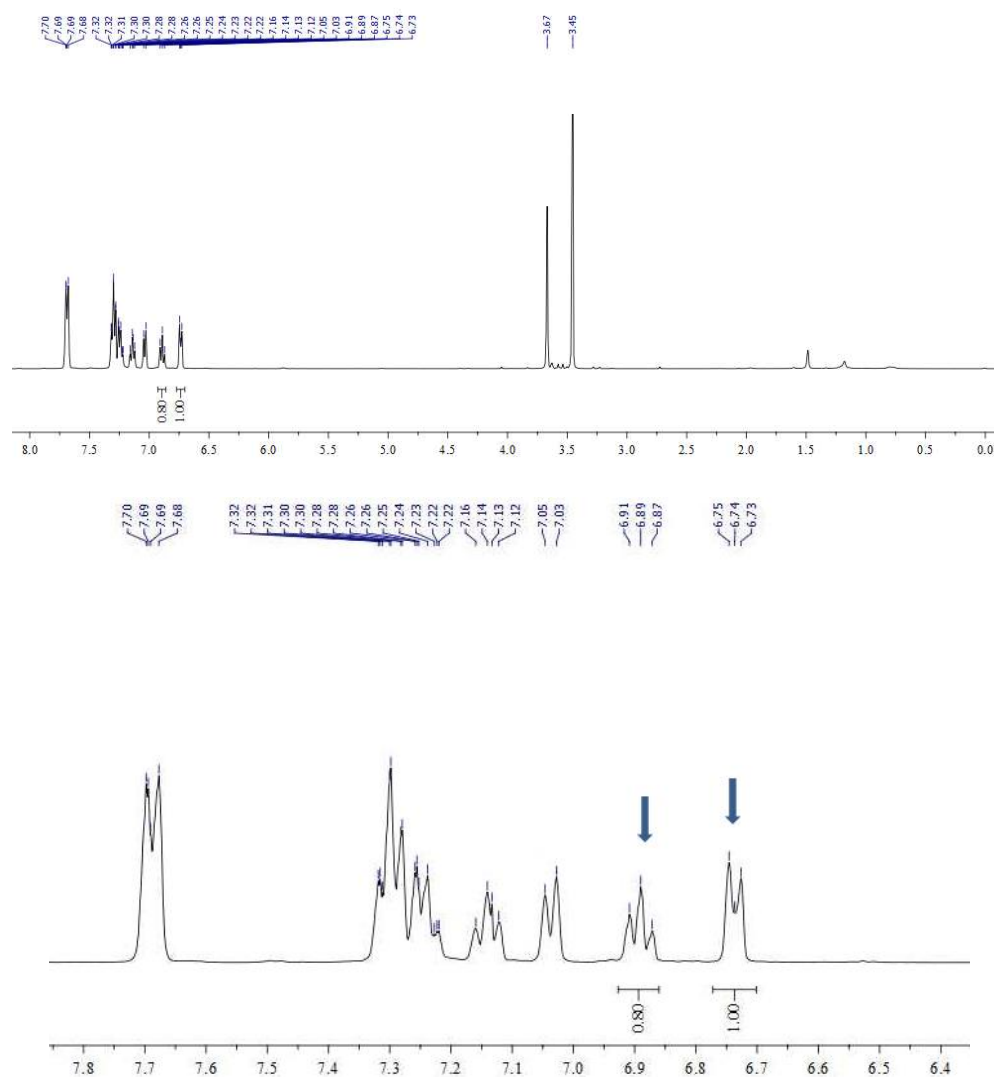

**Figure S5.** <sup>1</sup>H NMR for KIE study (**Parallel experiment**)

#### **b) Intermolecular KIE experiment**

To a dried seal tube containing a Teflon coated magnetic stir bar, phenyl N-methyl hydrazine **1a** (20 mg, 0.16 mmol), Phenyl N-methyl hydrazine **D<sub>5</sub>-1a** (21 mg, 0.16 mmol) were added followed by sulfoxonium ylide **2a** (48 mg, 0.25 mmol), [Cp\*RhCl<sub>2</sub>]<sub>2</sub> (2.5 mg, 2.5 mol %), AgSbF<sub>6</sub> (5.5 mg, 10 mol%) and

DCE (1.0 mL) as solvent. The tube was sealed after flushing with argon and placed in a preheated oil bath at 100 °C, and the reaction mixture was stirred at the same temperature for 20 min. The reaction mixture was cooled to room temperature, diluted with DCM and the solvent was removed under reduced pressure. The crude products were purified on column chromatography on 100-200 silica gel to afford the desired **products 3a** and **[D4]-3a**. The KIE value for the intermolecular experiment was found to be 3.5 ( $K_H/K_D = 3.5$ ) based on the  $^1\text{H}$  NMR analysis.

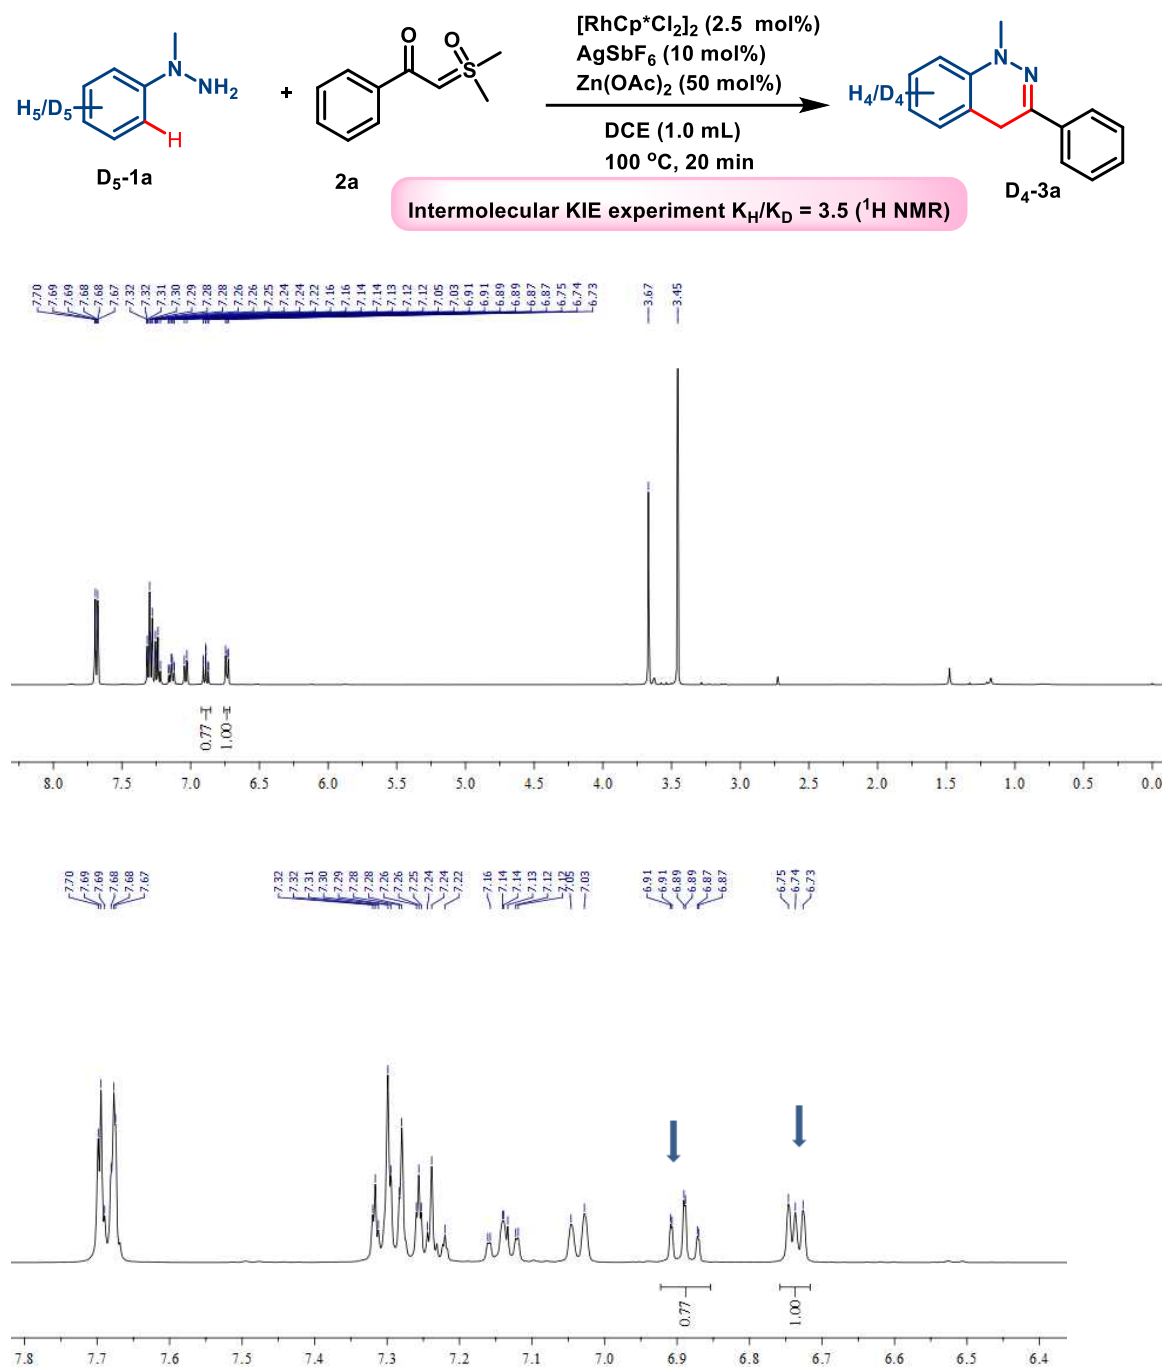

**Figure S6.**  $^1\text{H}$  NMR for intermolecular KIE study.

### 3. Analytical data of compounds

#### 1-Methyl-3-phenyl-1,4-dihydrocinnoline (3a)

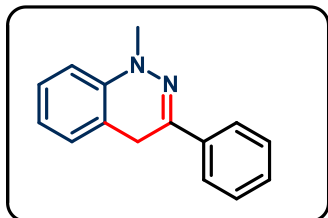

Yellow semi solid(0.25 mmol scale, 45.5 mg, 82%); **<sup>1</sup>H NMR** (400 MHz, CDCl<sub>3</sub>) δ 7.79 (m, 2H), 7.41 (m, 3H), 7.14 (d, *J* = 7.0 Hz, 1H), 7.14 (d, *J* = 7.0 Hz, 1H), 6.99 (m, 1H), 6.84 (d, *J* = 8.0 Hz, 1H), 3.77 (s, 2H), 3.56 (s, 3H). **<sup>13</sup>C NMR** (101 MHz, CDCl<sub>3</sub>) δ 141.01, 140.02, 136.88, 128.34, 127.74, 127.32, 125.36, 121.92, 118.12, 110.14, 76.68, 40.94, 27.86. **HR-MS** (ESI) *m/z* calcd for C<sub>15</sub>H<sub>15</sub>N<sub>2</sub><sup>+</sup> [M+H<sup>+</sup>]: 222.1157, found: 223.1222.

#### 1-methyl-3-(o-tolyl)-1,4-dihydrocinnoline(3b)

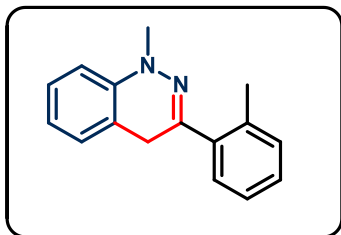

Greenish yellow semi solid(0.25 mmol scale, 46.6 mg, 79%); **<sup>1</sup>H NMR** (400 MHz, CDCl<sub>3</sub>) δ 7.35 – 7.31 (m, 1H), 7.08 (dd, *J* = 7.3, 0.8 Hz, 1H), 6.99 (m, 1H), 6.86 (d, *J* = 8.1 Hz, 1H), 3.57 (s, 2H), 3.49 (s, 3H), 2.38 (s, 3H). **<sup>13</sup>C NMR** (101 MHz, CDCl<sub>3</sub>) δ 144.24, 142.04, 137.77, 136.02, 130.85, 128.40, 128.14, 127.17, 125.86, 122.05, 118.47, 110.09, 40.79, 32.04, 20.70. **HR-MS** (ESI) *m/z* calcd for C<sub>16</sub>H<sub>15</sub>N<sub>2</sub><sup>+</sup> [M-H<sup>+</sup>] 235.1235, found: 235.1233.

#### 3-(4-methoxyphenyl)-1-methyl-1,4-dihydrocinnoline(3c)

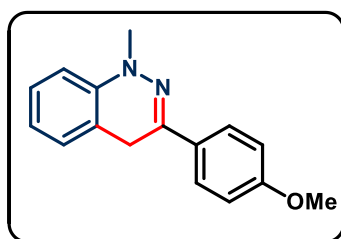

Yellow semi solid(0.25 mmol scale, 44 mg, 70%); **<sup>1</sup>H NMR** (400 MHz, CDCl<sub>3</sub>) δ 7.71 (d, *J* = 8.7 Hz, 2H), 7.25 – 7.18 (m, 1H), 7.11 (d, *J* = 7.0 Hz, 1H), 7.02 – 6.87 (m, 3H), 6.81 (d, *J* = 8.0 Hz, 1H), 3.82 (s, 3H), 3.71 (s, 2H), 3.51 (s, 3H). **<sup>13</sup>C NMR** (101 MHz, CDCl<sub>3</sub>) δ 159.93, 141.26, 140.13, 129.64, 127.65, 127.23, 126.77, 121.66, 118.16, 113.72, 113.47, 110.04, 55.30, 40.89, 27.98. **HR-MS** (ESI) *m/z* calcd for C<sub>16</sub>H<sub>17</sub>N<sub>2</sub>O<sup>+</sup> [M+H<sup>+</sup>]: 253.1335, found: 253.1336.

#### 3-(3-methoxyphenyl)-1-methyl-1,4-dihydrocinnoline (3d)

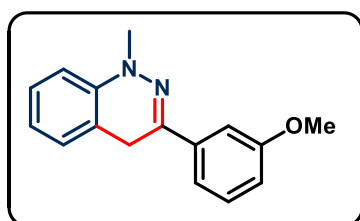

Yellow semi solid(0.25 mmol scale, 34 mg, 68%); **<sup>1</sup>H NMR** (400 MHz, CDCl<sub>3</sub>) δ 7.45 – 7.32 (m, 3H), 7.29 (s, 2H), 7.17 (d, *J* = 6.9 Hz, 1H), 7.08 – 6.99 (m, 1H), 6.94 (dd, *J* = 5.3, 1.4 Hz, 1H), 6.87

(d,  $J = 8.0$  Hz, 1H), 3.90 (s, 3H), 3.80 (s, 2H), 3.59 (s, 3H).  $^{13}\text{C}$  NMR (101 MHz,  $\text{CDCl}_3$ )  $\delta$  159.66 (s), 140.89 (s), 139.67 (s), 138.34, 129.27, 127.75, 127.31, 121.93, 118.10, 117.93, 114.27, 110.57, 110.14, 55.27, 40.94, 27.8. **HR-MS** (ESI)  $m/z$  calcd for  $\text{C}_{16}\text{H}_{17}\text{N}_2\text{O}^+$   $[\text{M}+\text{H}^+]$  253.1335, found: 253.1334.

### 3-(3-chlorophenyl)-1-methyl-1,4-dihydrocinnoline (3e)

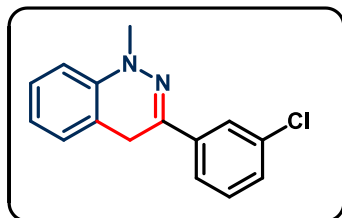

Pale yellow semi solid (0.25 mmol scale, 40 mg, 62%);  $^1\text{H}$  NMR (400 MHz,  $\text{CDCl}_3$ )  $\delta$  7.70 (s, 1H), 7.56 (dd,  $J = 4.6, 1.8$  Hz, 1H), 7.27 – 7.12 (m, 3H), 7.05 (d,  $J = 6.9$  Hz, 1H), 6.95 – 6.86 (m, 1H), 6.75 (d,  $J = 8.0$  Hz, 1H), 3.67 (s, 2H), 3.47 (s, 3H).  $^{13}\text{C}$  NMR (101 MHz,  $\text{CDCl}_3$ )  $\delta$  140.49, 138.75, 137.94, 134.45, 129.52, 128.15, 127.88, 127.49, 125.34, 123.26, 122.21, 117.72, 110.30, 40.99, 27.45. **HR-MS** (ESI)  $m/z$  calcd for  $\text{C}_{15}\text{H}_{14}\text{ClN}_2^+$   $[\text{M}+\text{H}^+]$ : 257.0840, found: 257.0845.

### 3-(3-fluorophenyl)-1-methyl-1,4-dihydrocinnoline (3f)

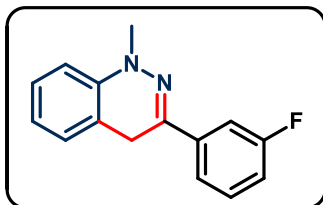

Yellow semi solid (0.25 mmol scale, 37.2 mg, 62%);  $^1\text{H}$  NMR (400 MHz,  $\text{CDCl}_3$ )  $\delta$  7.62 – 7.49 (m, 2H), 7.38 (dd,  $J = 14.0, 8.0$  Hz, 1H), 7.27 (d,  $J = 10.9$  Hz, 2H), 7.17 (d,  $J = 7.0$  Hz, 1H), 7.06 (m), 6.87 (d,  $J = 8.0$  Hz, 1H), 3.79 (s, 2H), 3.59 (s, 3H).  $^{13}\text{C}$  NMR (101 MHz,  $\text{CDCl}_3$ )  $\delta$  164.21, 161.78, 140.52, 139.30, 139.22 (d,  $J = 7.8$  Hz), 138.15 (d,  $J = 2.9$  Hz), 129.76 (d,  $J = 8.2$  Hz), 129.68, 127.86, 127.47, 122.16, 120.79 (d,  $J = 2.5$  Hz), 117.77, 115.18, 114.96, 112.16, 111.93, 110.29, 40.98, 27.51. **HR-MS** (ESI)  $m/z$  calcd for  $\text{C}_{15}\text{H}_{14}\text{FN}_2^+$   $[\text{M}+\text{H}^+]$  241.1141, found: 241.1136.

### 3-(4-chlorophenyl)-1-methyl-1,4-dihydrocinnoline (3g)

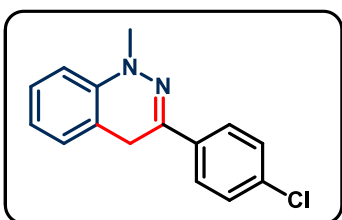

Pale yellow semi solid (0.25 mmol scale, 41 mg, 64%);  $^1\text{H}$  NMR (400 MHz,  $\text{CDCl}_3$ )  $\delta$  7.75 (d,  $J = 8.7$  Hz, 2H), 7.39 (d,  $J = 8.7$  Hz, 2H), 7.26 (s, 2H), 7.17 (d,  $J = 7.0$  Hz, 1H), 7.09 – 6.96 (m, 1H), 6.87 (d,  $J = 8.0$  Hz, 1H), 3.78 (s, 2H), 3.58 (s, 3H).  $^{13}\text{C}$  NMR (101 MHz,  $\text{CDCl}_3$ )  $\delta$  140.65, 138.46, 135.37, 134.12, 128.48, 127.83, 127.46, 126.52, 122.10, 117.79, 110.26, 40.97, 27.53. **HR-MS** (ESI)  $m/z$  calcd for  $\text{C}_{15}\text{H}_{12}\text{ClN}_2^+$   $[\text{M}+\text{H}^+]$ : 255.0689, found: 255.0684.

### 3-(4-iodophenyl)-1-methyl-1,4-dihydrocinnoline (3h)

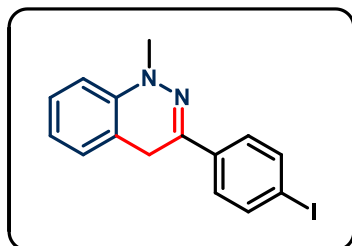

Yellow semi solid (0.25 mmol scale, 59.2 mg, 68%);  $^1\text{H}$  NMR (400 MHz,  $\text{CDCl}_3$ )  $\delta$  7.77 – 7.66 (m, 2H), 7.59 – 7.44 (m, 2H), 7.30 – 7.20 (m, 1H), 7.13 (d,  $J$  = 7.3 Hz, 1H), 7.00 (m, 1H), 6.83 (d,  $J$  = 8.1 Hz, 1H), 3.74 (s, 2H), 3.55 (s, 3H).  $^{13}\text{C}$  NMR (101 MHz,  $\text{CDCl}_3$ )  $\delta$  140.48, 138.35, 137.33, 136.36, 127.83, 127.44, 126.92, 122.10, 117.73, 110.24, 94.03, 40.97, 27.25. **HR-MS** (ESI)  $m/z$  calcd for  $\text{C}_{15}\text{H}_{12}\text{N}_2\text{I}^+$  [ $\text{M}+\text{H}^+$ ]: 347.0045, found: 347.0040.

### 3-(2-fluorophenyl)-1-methyl-1,4-dihydrocinnoline (3i)

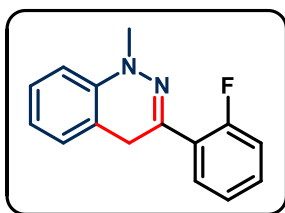

Yellow semi solid (0.25 mmol scale, 40 mg, 66%);  $^1\text{H}$  NMR (400 MHz,  $\text{CDCl}_3$ )  $\delta$  7.65 (m, 1H), 7.34 (dd,  $J$  = 9.2, 3.2 Hz, 1H), 7.31 – 7.23 (m, 1H), 7.20 – 7.08 (m, 3H), 7.07 – 7.01 (m, 1H), 6.89 (d,  $J$  = 8.1 Hz, 1H), 3.80 (s, 2H), 3.57 (s, 3H).  $^{13}\text{C}$  NMR (101 MHz,  $\text{CDCl}_3$ )  $\delta$  162.49, 160.01, 141.64, 139.30, 130.10 (d,  $J$  = 8.5 Hz), 129.66 (d,  $J$  = 3.7 Hz), 125.62 (d,  $J$  = 11.9 Hz), 127.50, 127.22, 125.68, 124.20 (d,  $J$  = 3.4 Hz), 122.38, 118.43, 116.18, 115.96, 110.10, 40.88, 31.18 (d,  $J$  = 7.2 Hz). **HR-MS** (ESI)  $m/z$  calcd for  $\text{C}_{15}\text{H}_{14}\text{FN}_2^+$  [ $\text{M}+\text{H}^+$ ]: 241.1141, found: 241.1136.

### 1-methyl-3-(4-nitrophenyl)-1,4-dihydrocinnoline (3j)

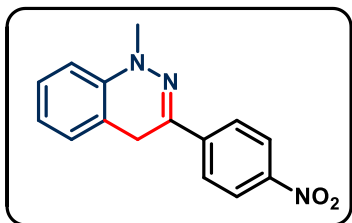

Orange solid (0.25 mmol scale, 36 mg, 54%) mp 200-210 °C;  $^1\text{H}$  NMR (400 MHz,  $\text{CDCl}_3$ )  $\delta$  8.25 – 8.18 (m, 2H), 7.89 (d,  $J$  = 9.0 Hz, 2H), 7.29 – 7.20 (m, 1H), 7.13 (d,  $J$  = 7.3 Hz, 1H), 7.01 (m, 1H), 6.83 (d,  $J$  = 8.1 Hz, 1H), 3.82 (s, 2H), 3.58 (s, 3H).  $^{13}\text{C}$  NMR (101 MHz,  $\text{CDCl}_3$ )  $\delta$  147.04, 142.96, 139.54, 135.95, 128.14, 127.77, 125.33, 123.65, 122.85, 117.39, 110.63, 41.18, 26.88. **HR-MS** (ESI)  $m/z$  calcd for  $\text{C}_{15}\text{H}_{12}\text{N}_3\text{O}_2^+$  [ $\text{M}+\text{H}^+$ ]: 266.0930, found: 266.0925.

### 1-methyl-3-(3-nitrophenyl)-1,4-dihydrocinnoline (3k)

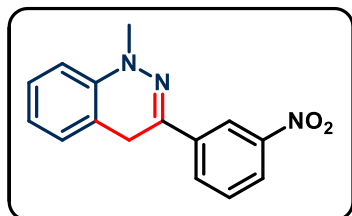

Red solid (0.25 mmol scale, 30.04 mg, 45%) mp 190-200 °C;  $^1\text{H}$  NMR (400 MHz,  $\text{CDCl}_3$ )  $\delta$  8.52 (t,  $J$  = 2.0 Hz, 1H), 8.11 – 8.01 (m, 2H), 7.47 (t,  $J$  = 8.0 Hz, 1H), 7.23 – 7.16 (m, 1H), 7.09 (d,  $J$  = 7.3 Hz, 1H), 6.95 (m, 1H), 6.78 (d,  $J$  = 8.1 Hz, 1H), 3.76 (s, 2H), 3.51 (s, 3H).  $^{13}\text{C}$  NMR (101 MHz,  $\text{CDCl}_3$ )  $\delta$  148.52, 139.94, 138.71, 136.21, 130.66, 129.15, 128.07, 127.71, 122.57, 122.53, 119.81, 117.32, 110.52, 41.09, 27.09. **HR-MS** (ESI)  $m/z$  calcd for  $\text{C}_{15}\text{H}_{14}\text{N}_3\text{O}_2^+$  [ $\text{M}+\text{H}^+$ ]: 268.1086, found: 268.1081.

### 1-methyl-3-(thiophen-2-yl)-1,4-dihydrocinnoline(3l)

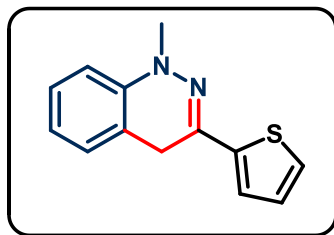

Yellow semi solid(0.25 mmol scale, 47.8 mg, 84%); <sup>1</sup>H NMR (400 MHz, CDCl<sub>3</sub>) δ 7.15 (m, 3H), 7.04 (d, *J* = 7.0 Hz, 1H), 6.94 (dd, *J* = 5.0, 3.7 Hz, 1H), 6.89 (m, 1H), 6.73 (d, *J* = 8.0 Hz, 1H), 3.68 (s, 2H), 3.43 (s, 3H). <sup>13</sup>C NMR (101 MHz, CDCl<sub>3</sub>) δ 142.51, 140.79, 136.22, 127.81, 127.41, 127.09, 126.07, 124.17, 121.87, 117.72, 110.47, 40.86, 28.16. **HR-MS** (ESI) *m/z* calcd for C<sub>13</sub>H<sub>12</sub>N<sub>2</sub>S<sup>+</sup> [M+H<sup>+</sup>]: 229.0794, found: 229.0802.

### (E)-1-methyl-3-styryl-1,4-dihydrocinnoline(3m)

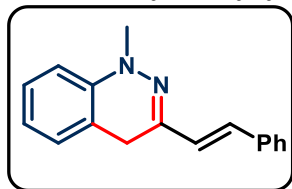

Yellow solid(0.25 mmol scale, 44.7 mg, 72%) mp 220-225 °C; <sup>1</sup>H NMR (400 MHz, CDCl<sub>3</sub>) δ 7.48 (d, *J* = 7.5 Hz, 2H), 7.33 (t, *J* = 7.6 Hz, 2H), 7.23 (m, 2H), 7.13 (d, *J* = 7.3 Hz, 1H), 6.98 (dd, *J* = 15.8, 9.0 Hz, 2H), 6.81 (s, 1H), 6.78 (d, *J* = 7.1 Hz, 1H), 3.65 (s, 2H), 3.49 (s, 3H). <sup>13</sup>C

NMR (101 MHz, CDCl<sub>3</sub>) δ 141.25, 140.46, 136.92, 129.85, 128.72, 128.0, 127.84, 127.39, 127.35, 126.63, 122.02, 117.95, 110.44, 40.80, 25.80. **HR-MS** (ESI) *m/z* calcd for C<sub>17</sub>H<sub>17</sub>N<sub>2</sub><sup>+</sup> [M+H<sup>+</sup>] 249.1392, found: 249.1374.

### 3-Cyclohexyl-1-methyl-1,4-dihydrocinnoline(3n)

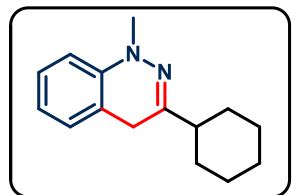

Yellow semi solid(0.25 mmol scale, 41 mg, 67%); <sup>1</sup>H NMR (400 MHz, CDCl<sub>3</sub>) δ 7.21 (t, *J* = 7.1 Hz, 1H), 7.07 (d, *J* = 6.8 Hz, 1H), 7.00 – 6.91 (m, 1H), 6.80 (d, *J* = 8.0 Hz, 1H), 3.39 (s, 3H), 3.21 (s, 2H), 2.32 (t, *J* = 10.0 Hz, 1H), 1.81 (d, *J* = 7.0 Hz, 4H), 1.71 (d, *J* = 11.9 Hz, 1H), 1.41 –

1.25 (m, 5H). <sup>13</sup>C NMR (101 MHz, CDCl<sub>3</sub>) δ 150.93, 143.00, 126.98, 126.94, 121.40, 118.87, 109.98, 44.89, 40.48, 30.19, 28.5, 26.08, 26.03. **HR-MS** (ESI) *m/z* calcd for C<sub>15</sub>H<sub>21</sub>N<sub>2</sub><sup>+</sup> [M+H<sup>+</sup>]: 229.1705, found: 229.1700.

### 1-methyl-3-neopentyl-1,4-dihydrocinnoline (3o)

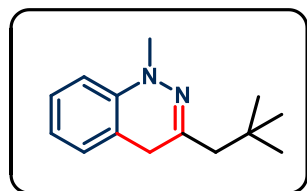

Yellow semi solid(0.25 mmol scale, 36.8 mg, 68%); <sup>1</sup>H NMR (400 MHz, CDCl<sub>3</sub>) δ 7.16 (dd, *J* = 14.3, 7.0 Hz, 1H), 6.98 (d, *J* = 6.8 Hz, 1H), 6.90 (m, 1H), 6.75 (d, *J* = 8.0 Hz, 1H), 3.34 (s, 3H), 3.15 (s, 2H), 2.20 (s, 2H), 0.91 (s, 9H). <sup>13</sup>C NMR (101 MHz, CDCl<sub>3</sub>) δ 146.07,

142.83, 126.88, 126.77, 121.64, 118.82, 109.91, 49.81, 40.50, 33.46, 31.88, 29.93. **HR-MS** (ESI) *m/z* calcd for C<sub>14</sub>H<sub>21</sub>N<sub>2</sub><sup>+</sup> [M+H<sup>+</sup>]: 217.1705, found: 217.1669.

### 3-(tert-butyl)-1-methyl-1,4-dihydrocinnoline(3p)

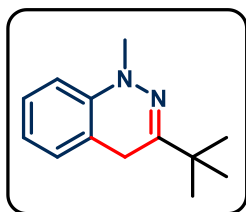

Yellow semi solid (0.25 mmol scale, 36.9 mg, 73%);  $^1\text{H}$  NMR (400 MHz,  $\text{CDCl}_3$ )  $\delta$  7.22 (t,  $J$  = 7.1 Hz, 1H), 7.10 (d,  $J$  = 6.7 Hz, 1H), 6.96 (dd,  $J$  = 7.3, 6.5 Hz, 1H), 6.81 (d,  $J$  = 8.0 Hz, 1H), 3.40 (s, 3H), 3.21 (s, 2H), 1.18 (s, 9H).  $^{13}\text{C}$  NMR (101 MHz,  $\text{CDCl}_3$ )  $\delta$  152.91, 143.11, 126.85, 126.82, 121.29, 119.63, 109.89, 40.63, 36.83, 29.69, 27.69. **HR-MS** (ESI)  $m/z$  calcd for  $\text{C}_{13}\text{H}_{17}\text{N}_2^+$  [ $\text{M}-\text{H}^+$ ]: 201.1392, found: 201.1386.

### 3-([1,1'-biphenyl]-4-yl)-1-methyl-1,4-dihydrocinnoline (3q)

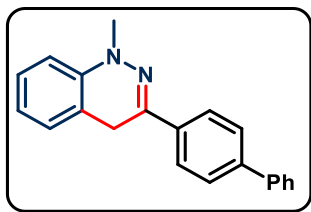

Yellow semi solid (0.25 mmol scale, 46.2 mg, 62%);  $^1\text{H}$  NMR (400 MHz,  $\text{CDCl}_3$ )  $\delta$  7.90 – 7.83 (m, 2H), 7.65 (d,  $J$  = 7.4 Hz, 4H), 7.47 (t,  $J$  = 7.5 Hz, 2H), 7.37 (t,  $J$  = 7.3 Hz, 1H), 7.26 (t,  $J$  = 7.7 Hz, 1H), 7.17 (d,  $J$  = 7.3 Hz, 1H), 7.01 (t,  $J$  = 7.4 Hz, 1H), 6.86 (d,  $J$  = 8.1 Hz, 1H), 3.82 (s, 2H), 3.59 (s, 3H).  $^{13}\text{C}$  NMR (101 MHz,  $\text{CDCl}_3$ )  $\delta$  140.94, 140.90, 140.61, 139.49, 135.82, 128.78, 127.79, 127.37, 127.34, 126.99, 126.98, 125.72, 121.95, 118.06, 110.17, 40.98, 27.74. **HR-MS** (ESI)  $m/z$  calcd for  $\text{C}_{21}\text{H}_{19}\text{N}_2^+$  [ $\text{M}+\text{H}^+$ ]: 299.1548, found: 299.1543.

### 1-methyl-3-(naphthalen-2-yl)-1,4-dihydrocinnoline (3r)

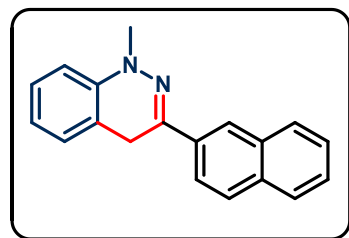

Yellow solid (0.25 mmol scale, 37.4 mg, 55%) mp 240-245 °C;  $^1\text{H}$  NMR (400 MHz,  $\text{CDCl}_3$ )  $\delta$  8.13 (dd,  $J$  = 8.7, 1.8 Hz, 1H), 8.06 (s, 1H), 7.91 (d,  $J$  = 2.4 Hz, 1H), 7.84 (d,  $J$  = 8.6 Hz, 2H), 7.54 – 7.44 (m, 2H), 7.29 – 7.24 (m, 1H), 7.20 (d,  $J$  = 6.8 Hz, 1H), 7.02 (m, 1H), 6.87 (d,  $J$  = 8.1 Hz, 1H), 3.92 (s, 2H), 3.61 (s, 3H).  $^{13}\text{C}$  NMR (101 MHz,  $\text{CDCl}_3$ )  $\delta$  140.74, 139.45, 134.32, 133.31, 133.26, 128.29, 127.90, 127.88, 127.64, 127.38, 126.20, 126.14, 124.23, 123.35, 121.9, 118.11, 110.22, 77.32, 41.05, 27.47. **HR-MS** (ESI)  $m/z$  calcd for  $\text{C}_{19}\text{H}_{19}\text{N}_2^+$  [ $\text{M}+\text{H}^+$ ]: 275.1544, found: 275.1543.

### 3-(adamantan-1-yl)-1-methyl-1,4-dihydrocinnoline (3s)

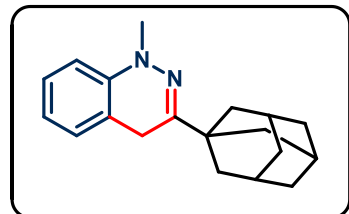

Yellow semi solid (0.25 mmol scale, 29.4 mg, 42%);  $^1\text{H}$  NMR (400 MHz,  $\text{CDCl}_3$ )  $\delta$  7.25 – 7.19 (m, 1H), 7.10 (d,  $J$  = 6.7 Hz, 1H), 6.96 (m, 1H), 6.82 (d,  $J$  = 8.0 Hz, 1H), 3.42 (s, 3H), 3.20 (s, 2H), 2.06 (s, 3H), 1.83 (d,  $J$  = 2.7 Hz, 6H), 1.75 (q,  $J$  = 12.1 Hz, 6H).  $^{13}\text{C}$  NMR (101 MHz,  $\text{CDCl}_3$ )  $\delta$  153.24, 143.29, 126.83, 126.73, 121.30, 119.54, 109.83, 40.60, 39.65, 38.65, 36.86, 28.26, 26.37. **HR-MS** (ESI)  $m/z$  calcd for  $\text{C}_{19}\text{H}_{23}\text{N}_2^+$  [ $\text{M}-\text{H}^+$ ] 279.1861, found: 279.1841.



**1,7-dimethyl-3-phenyl-1,4-dihydrocinnoline (4a)**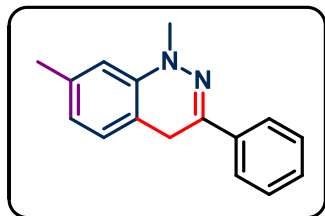

Yellow semi solid (0.25 mmol scale, 36.5 mg, 62%) mp 170-175 °C; <sup>1</sup>H NMR (400 MHz, CDCl<sub>3</sub>) δ 7.78 (dd, *J* = 5.3, 3.3 Hz, 2H), 7.37 (m, 3H), 7.02 (d, *J* = 7.5 Hz, 1H), 6.81 (d, *J* = 7.5 Hz, 1H), 6.66 (s, 1H), 3.74 (s, 2H), 3.55 (s, 3H), 2.37 (s, 3H). <sup>13</sup>C NMR (101 MHz, CDCl<sub>3</sub>) δ 140.84, 140.05, 137.07, 137.01, 128.31, 128.26, 128.03, 127.56, 125.31, 122.61, 115.19, 110.89, 40.96, 27.47, 21.56. **HR-MS** (ESI) *m/z* calcd for C<sub>16</sub>H<sub>15</sub>N<sub>2</sub><sup>+</sup> [M-H<sup>+</sup>] 235.1235, found: 235.1230.

**6-methoxy-1-methyl-3-phenyl-1,4-dihydrocinnoline (4b)**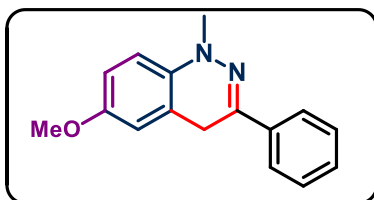

Pale yellow semi solid (0.25 mmol scale, 44.7 mg, 71%); <sup>1</sup>H NMR (400 MHz, CDCl<sub>3</sub>) δ 7.77 (dd, *J* = 5.3, 3.3 Hz, 2H), 7.43 – 7.29 (m, 3H), 6.82 – 6.76 (m, 2H), 6.73 (d, *J* = 1.8 Hz, 1H), 3.79 (s, 3H), 3.76 (s, 2H), 3.53 (s, 3H). <sup>13</sup>C NMR (101 MHz, CDCl<sub>3</sub>) δ 155.22, 138.65, 137.02, 135.38, 128.32, 128.15, 125.21, 119.67, 113.26, 112.55, 111.18, 55.67, 41.26, 28.12. **HR-MS** (ESI) *m/z* calcd for C<sub>16</sub>H<sub>17</sub>N<sub>2</sub>O<sup>+</sup> [M+H<sup>+</sup>] 253.1341, found: 235.1335.

**1,6-dimethyl-3-phenyl-1,4-dihydrocinnoline (4c)**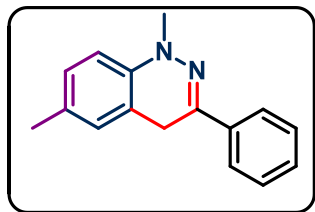

Yellow solid (0.25 mmol scale, 43 mg, 73%); <sup>1</sup>H NMR (400 MHz, CDCl<sub>3</sub>) δ 7.77 (d, *J* = 7.1 Hz, 2H), 7.42 – 7.31 (m, 3H), 7.04 (d, *J* = 8.1 Hz, 1H), 6.96 (s, 1H), 6.74 (d, *J* = 8.2 Hz, 1H), 3.74 (s, 2H), 3.53 (s, 3H), 2.31 (s, 3H). <sup>13</sup>C NMR (101 MHz, CDCl<sub>3</sub>) δ 139.62, 138.89, 137.05, 131.42, 128.30, 128.20, 127.76, 125.80, 125.28, 118.17, 110.14, 41.04, 27.81, 20.58. **HR-MS** (ESI) *m/z* calcd for C<sub>16</sub>H<sub>15</sub>N<sub>2</sub><sup>+</sup> [M-H<sup>+</sup>] 235.1235, found: 235.1231.

**6-fluoro-1-methyl-3-phenyl-1,4-dihydrocinnoline (4d)**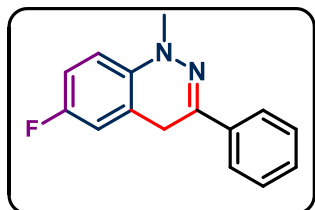

Yellow solid (0.25 mmol scale, 43.2 mg, 72%) mp 190-195 °C; <sup>1</sup>H NMR (400 MHz, CDCl<sub>3</sub>) δ 7.81 – 7.73 (m, 2H), 7.44 – 7.31 (m, 3H), 6.94 (m, 1H), 6.88 (dd, *J* = 8.5, 2.8 Hz, 1H), 6.76 (dd, *J* = 8.8, 4.6 Hz, 1H), 3.75 (s, 2H), 3.53 (s, 3H). <sup>13</sup>C NMR (101 MHz, CDCl<sub>3</sub>) δ 159.67, 157.29, 138.95, 137.54 (d, *J* = 1.7 Hz), 137.53, 136.58, 128.42 (d, *J* = 7.6 Hz), 128.37, 125.31, 119.95 (d, *J* = 7.9 Hz), 114.40, 114.17, 113.76, 113.53, 111.09 (d, *J* = 8.0 Hz), 41.27, 27.97. **HR-MS** (ESI) *m/z* calcd for C<sub>15</sub>H<sub>12</sub>FN<sub>2</sub><sup>+</sup> [M-H<sup>+</sup>] 239.0985, found: 239.0989.

#### 6-Chloro-1-methyl-3-phenyl-1,4-dihydrocinnoline(4e)

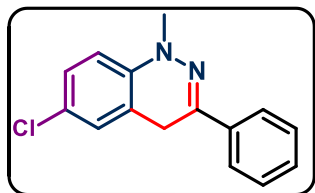

Pale yellow semi solid (0.25 mmol scale, 49.4 mg, 77%);  $^1\text{H NMR}$  (400 MHz,  $\text{CDCl}_3$ )  $\delta$  7.80 – 7.73 (m, 2H), 7.38 (m, 3H), 7.18 (dd,  $J$  = 8.5, 2.0 Hz, 1H), 7.11 (s, 1H), 6.74 (d,  $J$  = 8.6 Hz, 1H), 3.74 (s, 2H), 3.53 (s, 3H).  $^{13}\text{C NMR}$  (101 MHz,  $\text{CDCl}_3$ )  $\delta$  139.69, 139.54, 136.47, 128.58, 128.40, 127.48, 127.15, 126.51, 125.33, 119.78, 111.27, 41.05, 27.64. **HR-MS** (ESI)  $m/z$  calcd for  $\text{C}_{15}\text{H}_{12}\text{ClN}_2^+$  [M-H $^+$ ] 255.0689, found: 255.0679.

#### 6-bromo-1-methyl-3-phenyl-1,4-dihydrocinnoline (4f)

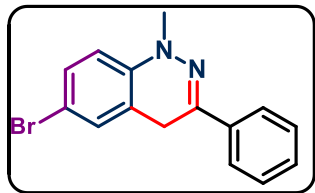

Yellow semi solid (0.25 mmol scale, 54.8 mg, 73%);  $^1\text{H NMR}$  (400 MHz,  $\text{CDCl}_3$ )  $\delta$  7.81 – 7.74 (m, 2H), 7.43 – 7.30 (m, 4H), 7.25 (dd,  $J$  = 2.9, 1.9 Hz, 1H), 6.69 (d,  $J$  = 8.6 Hz, 1H), 3.74 (s, 2H), 3.52 (s, 3H).  $^{13}\text{C NMR}$  (101 MHz,  $\text{CDCl}_3$ )  $\delta$  139.97, 139.84, 136.47, 130.33, 130.07, 128.61, 128.40, 125.34, 120.19, 113.77, 111.69, 40.99, 27.54. **HR-MS** (ESI)  $m/z$  calcd for  $\text{C}_{15}\text{H}_{12}\text{BrN}_2^+$  [M-H $^+$ ] 299.0184, found: 299.0175.

#### 7-bromo-1-methyl-3-phenyl-1,4-dihydrocinnoline (4g)

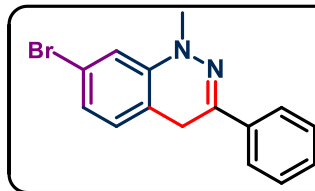

Yellow semi solid (0.25 mmol scale, 63 mg, 84%);  $^1\text{H NMR}$  (400 MHz,  $\text{CDCl}_3$ )  $\delta$  7.81 – 7.73 (m, 2H), 7.45 – 7.30 (m, 3H), 7.04 (d,  $J$  = 8.0 Hz, 1H), 6.94 (dd,  $J$  = 8.0, 1.9 Hz, 1H), 6.81 (d,  $J$  = 1.9 Hz, 1H), 3.73 (s, 2H), 3.52 (s, 3H).  $^{13}\text{C NMR}$  (101 MHz,  $\text{CDCl}_3$ )  $\delta$  141.77, 140.53, 136.46, 133.02, 128.66, 128.39, 125.39, 121.54, 116.42, 110.34, 40.91, 27.31. **HR-MS** (ESI)  $m/z$  calcd for  $\text{C}_{15}\text{H}_{12}\text{BrN}_2^+$  [M-H $^+$ ] 299.0184, found: 299.0183.

#### 7-chloro-1-methyl-3-phenyl-1,4-dihydrocinnoline(4h)

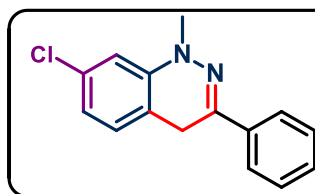

Pale yellow semi solid (0.25 mmol scale, 58 mg, 90%);  $^1\text{H NMR}$  (400 MHz,  $\text{CDCl}_3$ )  $\delta$  7.79 – 7.73 (m, 2H), 7.45 – 7.32 (m, 3H), 7.08 (m, 1H), 6.97 (dd,  $J$  = 10.0, 4.9 Hz, 2H), 3.71 (s, 2H), 3.52 (s, 3H).  $^{13}\text{C NMR}$  (101 MHz,  $\text{CDCl}_3$ )  $\delta$  142.00, 140.52, 136.43, 128.98, 128.68, 128.40, 125.40, 124.48, 120.95, 116.95, 113.15, 40.91, 27.39. **HR-MS** (ESI)  $m/z$  calcd for  $\text{C}_{15}\text{H}_{12}\text{ClN}_2^+$  [M-H $^+$ ] 255.0689, found: 255.0679.

#### 7-fluoro-1-methyl-3-phenyl-1,4-dihydrocinnoline(4i)

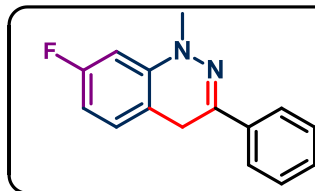

Yellow semi solid (0.25mmol scale, 43.2 mg, 72%);  $^1\text{H NMR}$  (400 MHz,  $\text{CDCl}_3$ )  $\delta$  7.83 – 7.77 (m, 2H), 7.41 (m, 3H), 7.16 (dd,  $J$  = 14.6,

8.2 Hz, 1H), 6.74 – 6.65 (m, 1H), 6.56 (d,  $J = 8.3$  Hz, 1H), 3.82 (s, 2H), 3.54 (s, 3H).  **$^{13}\text{C}$  NMR** (101 MHz,  $\text{CDCl}_3$ )  $\delta$  161.39, 158.97, 141.72 (d,  $J = 7.4$  Hz), 138.96, 136.68, 128.55, 128.35, 127.77, 127.82 (d,  $J = 9.9$  Hz), 125.27 (d,  $J = 19.8$  Hz), 107.91, 107.69, 105.72, 41.30, 20.51 (d,  $J = 3.8$  Hz).  **$^{19}\text{F}$  NMR** (377 MHz,  $\text{CDCl}_3$ )  $\delta$  -119.94. **HR-MS** (ESI)  $m/z$  calcd for  $\text{C}_{15}\text{H}_{14}\text{FN}_2^+ [\text{M}+\text{H}^+]$  241.1141, found: 241.1136.

#### 8-Fluoro-1-methyl-3-phenyl-1,4-dihydrocinnoline(4j)

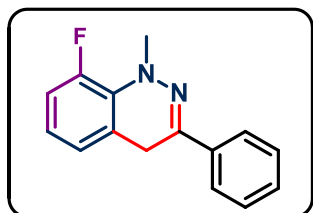

Yellow semi solid (0.25mmol scale, 38 mg, 63%);  **$^1\text{H}$  NMR** (400 MHz,  $\text{CDCl}_3$ )  $\delta$  7.78 (d,  $J = 6.9$  Hz, 2H), 7.48 – 7.31 (m, 3H), 7.00 – 6.83 (m, 3H), 3.81 (d,  $J = 7.3$  Hz, 3H), 3.70 (s, 2H).  **$^{13}\text{C}$  NMR** (101 MHz,  $\text{CDCl}_3$ )  $\delta$  150.33, 147.91, 140.86, 136.34, 128.91 (d,  $J = 8.0$  Hz), 128.63, 123.30 (d,  $J = 2.8$  Hz), 125.45, 123.31, 123.28, 122.02 (d,  $J = 8.0$  Hz), 121.72 (d,  $J = 3.3$  Hz), 115.31, 115.08, 44.15, 27.82 (d,  $J = 3.0$  Hz).  **$^{19}\text{F}$  NMR** (377 MHz,  $\text{CDCl}_3$ )  $\delta$  -127.03. **HR-MS** (ESI)  $m/z$  calcd for  $\text{C}_{15}\text{H}_{12}\text{FN}_2^+ [\text{M}-\text{H}^+]$  239.0985, found: 239.0979.

#### 1-methyl-3-phenyl-7-(trifluoromethyl)-1,4-dihydrocinnoline(4k)

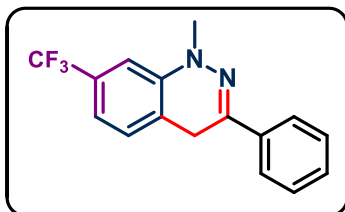

Yellow semi solid (0.25 mmol scale, 47.1 mg, 65%);  **$^1\text{H}$  NMR** (400 MHz,  $\text{CDCl}_3$ )  $\delta$  7.81 – 7.75 (m, 2H), 7.44 – 7.35 (m, 3H), 7.23 (s, 2H), 7.03 (s, 1H), 3.80 (s, 2H), 3.58 (s, 3H).  **$^{13}\text{C}$  NMR** (101 MHz,  $\text{CDCl}_3$ )  $\delta$  141.14, 140.22, 136.26, 129.69, 128.80, 128.45, 128.09, 125.47, 121.74, 118.41 (q,  $J = 3.9$  Hz), 118.39, 106.73, 106.69, 40.87, 27.82.  **$^{19}\text{F}$  NMR** (377 MHz,  $\text{CDCl}_3$ )  $\delta$  -62.48. **HR-MS** (ESI)  $m/z$  calcd for  $\text{C}_{16}\text{H}_{14}\text{F}_3\text{N}_2^+ [\text{M}+\text{H}^+]$  291.1109, found: 291.1104.

#### 1-methyl-3-phenyl-6-(trifluoromethyl)-1,4-dihydrocinnoline(4l)

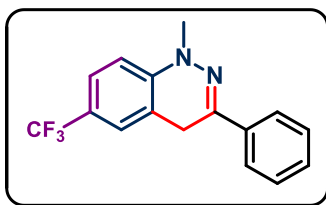

Yellow semi solid (0.25 mmol scale, 60.9 mg, 84%);  **$^1\text{H}$  NMR** (400 MHz,  $\text{CDCl}_3$ )  $\delta$  7.82 – 7.75 (m, 2H), 7.48 (d,  $J = 8.4$  Hz, 1H), 7.41 (m, 4H), 6.85 (d,  $J = 8.5$  Hz, 1H), 3.81 (s, 2H), 3.58 (s, 3H).  **$^{13}\text{C}$  NMR** (101 MHz,  $\text{CDCl}_3$ )  $\delta$  143.06, 140.58, 136.18, 128.88, 128.45, 125.85, 125.45, 124.83 (q,  $J = 21.2, 3.7$  Hz), 123.67, 123.25 (d,  $J = 18.8$  Hz), 118.04, 109.74, 40.91, 27.60.  **$^{19}\text{F}$  NMR** (377 MHz,  $\text{CDCl}_3$ )  $\delta$  -61.40. **HR-MS** (ESI)  $m/z$  calcd for  $\text{C}_{16}\text{H}_{14}\text{F}_3\text{N}_2^+ [\text{M}+\text{H}^+]$  291.1109, found: 291.1100

### 1-methyl-3-phenyl-1,4-dihydrocinnoline-6-carbonitrile (4m)

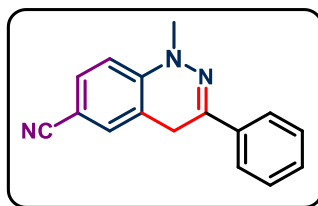

Yield (0.25 mmol scale, 40.8 mg, 66%);  $^1\text{H}$  NMR (400 MHz,  $\text{CDCl}_3$ )  $\delta$  7.81 – 7.70 (m, 2H), 7.49 (dd,  $J$  = 8.5, 1.8 Hz, 1H), 7.46 – 7.34 (m, 4H), 6.79 (d,  $J$  = 8.5 Hz, 1H), 3.78 (s, 2H), 3.56 (s, 3H).  $^{13}\text{C}$  NMR (101 MHz,  $\text{CDCl}_3$ )  $\delta$  143.27, 141.09, 135.75, 131.97, 131.57, 129.14, 128.4, 125.43, 119.53, 118.21, 110.09, 103.86, 40.78, 27.14. **HR-MS**

(ESI)  $m/z$  calcd for  $\text{C}_{16}\text{H}_{14}\text{F}_3\text{N}_2^+$  [ $\text{M}+\text{H}^+$ ] 248.1182, found: 248.1181

### 1-ethyl-3-phenyl-1,4-dihydrocinnoline(6a)

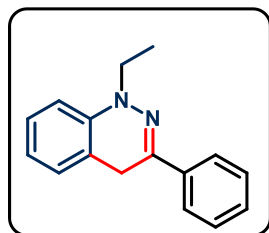

Yellow semi solid (0.25 mmol scale, 37.2 mg, 63%);  $^1\text{H}$  NMR (400 MHz,  $\text{CDCl}_3$ )  $\delta$  7.82 – 7.77 (m, 2H), 7.40 (dd,  $J$  = 8.1, 6.6 Hz, 2H), 7.36 – 7.28 (m, 2H), 7.25 – 7.19 (m, 1H), 7.14 (d,  $J$  = 6.9 Hz, 1H), 6.96 (dd,  $J$  = 7.7, 7.1 Hz, 1H), 6.86 (d,  $J$  = 8.2 Hz, 1H), 3.96 (q,  $J$  = 7.1 Hz, 2H), 3.77 (s, 2H), 1.41 (t,  $J$  = 7.1 Hz, 3H).  $^{13}\text{C}$  NMR (101 MHz,  $\text{CDCl}_3$ )  $\delta$  139.65, 139.37, 137.19, 128.39, 128.31, 128.28, 127.32, 125.37, 121.60, 118.29, 110.46, 47.04, 27.82, 12.46. **HR-MS** (ESI)  $m/z$  calcd for  $\text{C}_{16}\text{H}_{15}\text{N}_2^+$  [ $\text{M}-\text{H}^+$ ] 235.1235, found: 235.1230

### 1-isopropyl-3-phenyl-1,4-dihydrocinnoline(6b)

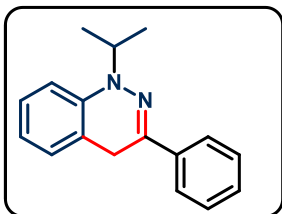

Yellow semi solid (0.25mmol scale, 41.5 mg, 67%);  $^1\text{H}$  NMR (400 MHz,  $\text{CDCl}_3$ )  $\delta$  7.74 (dd,  $J$  = 8.3, 1.2 Hz, 2H), 7.33 – 7.28 (m, 2H), 7.27 – 7.21 (m, 1H), 7.15 – 7.10 (m, 1H), 7.07 – 7.03 (m, 1H), 4.33 (hept,  $J$  = 12.8, 6.4 Hz, 1H), 3.64 (s, 2H), 1.35 (d,  $J$  = 6.4 Hz, 6H).  $^{13}\text{C}$  NMR (101 MHz,  $\text{CDCl}_3$ )  $\delta$  139.86, 138.96, 137.32, 128.26, 128.24, 128.06, 127.13, 125.28, 121.16, 118.67, 110.53, 49.57, 27.74, 20.10. **HR-MS** (ESI)  $m/z$  calcd for  $\text{C}_{17}\text{H}_{17}\text{N}_2^+$  [ $\text{M}+\text{H}^+$ ] 249.1392, found: 249.1386.

### 1-butyl-3-phenyl-1,4-dihydrocinnoline(6c)

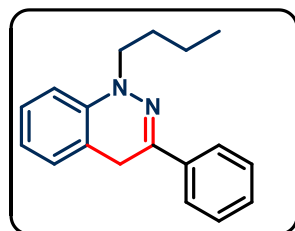

Yellow semi solid (0.25mmol scale, 44 mg, 66%);  $^1\text{H}$  NMR (400 MHz,  $\text{CDCl}_3$ )  $\delta$  7.78 (dd,  $J$  = 11.1, 3.8 Hz, 2H), 7.40 (t,  $J$  = 7.4 Hz, 2H), 7.33 (dd,  $J$  = 8.6, 5.9 Hz, 1H), 7.21 (t,  $J$  = 8.2 Hz, 1H), 7.12 (d,  $J$  = 7.2 Hz, 1H), 6.94 (t,  $J$  = 7.3 Hz, 1H), 6.83 (t,  $J$  = 6.9 Hz, 1H), 3.91 – 3.84 (t, 2H), 3.78 (s, 2H), 1.89 – 1.79 (m, 2H), 1.48 (m,  $J$  = 14.8, 7.4 Hz, 2H),

1.00 (t,  $J = 7.4$  Hz, 3H).  $^{13}\text{C}$  NMR (101 MHz,  $\text{CDCl}_3$ )  $\delta$  139.59, 138.63, 137.13, 128.28, 128.19, 128.14, 127.21, 125.21, 121.43, 117.97, 110.29, 52.29, 29.35, 27.57, 20.26, 13.98. **HR-MS** (ESI)  $m/z$  calcd for  $\text{C}_{19}\text{H}_{23}\text{N}_2^+$   $[\text{M}-\text{H}^+]$  263.1548, found: 263.1543

#### 1-benzyl-3-phenyl-1,4-dihydrocinnoline (6d)

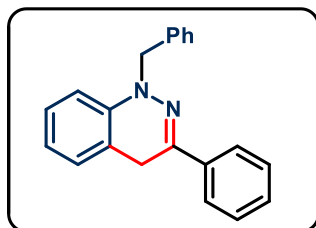

Yellow semi solid (0.25mmol scale, 62 mg, 83%);  $^1\text{H}$  NMR (400 MHz,  $\text{CDCl}_3$ )  $\delta$  7.71 (d,  $J = 8.0$  Hz, 2H), 7.34 – 7.27 (m, 4H), 7.27 – 7.18 (m, 4H), 7.14 (dd,  $J = 8.3, 6.0$  Hz, 2H), 7.04 – 6.93 (m, 2H), 6.81 (t,  $J = 7.4$  Hz, 1H), 6.59 (d,  $J = 8.2$  Hz, 1H), 5.07 (s, 2H), 3.77 (s, 2H).  $^{13}\text{C}$  NMR (101 MHz,  $\text{CDCl}_3$ )  $\delta$  139.26, 139.03, 138.20, 136.94, 128.50, 128.31, 128.12, 127.26, 126.95, 126.93, 125.24, 121.80, 117.66, 111.08, 57.14, 27.39. **HR-MS** (ESI)  $m/z$  calcd for  $\text{C}_{21}\text{H}_{19}\text{N}_2^+$   $[\text{M}+\text{H}^+]$  299.1548, found: 299.1539

#### 1,3-Diphenyl-1,4-dihydrocinnoline (6e)

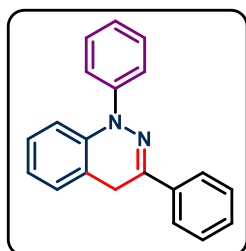

Greenish semi solid (0.25 mmol scale, 54.5 mg, 78%);  $^1\text{H}$  NMR (400 MHz,  $\text{CDCl}_3$ )  $\delta$  7.81 (d,  $J = 7.0$  Hz, 2H), 7.56 (d,  $J = 7.5$  Hz, 2H), 7.43 – 7.29 (m, 5H), 7.21 – 7.13 (m, 2H), 7.05 – 6.94 (m, 2H), 6.84 (d,  $J = 7.9$  Hz, 1H), 3.80 (s, 2H).  $^{13}\text{C}$  NMR (101 MHz,  $\text{CDCl}_3$ )  $\delta$  143.34, 141.11, 139.24, 135.54, 128.12, 127.76, 127.36, 126.97, 125.86, 124.83, 124.22, 123.35, 122.05, 117.92, 111.40, 27.37. **HR-MS** (ESI)  $m/z$  calcd for  $\text{C}_{20}\text{H}_{17}\text{N}_2^+$   $[\text{M}+\text{H}^+]$  285.1392, found: 285.1386

#### 4-(3-phenylcinnolin-1(4H)-yl)benzonitrile (8a)

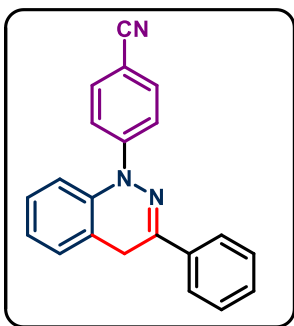

Yellow semi solid (0.25 mmol scale, 55 mg, 71%);  $^1\text{H}$  NMR (400 MHz,  $\text{CDCl}_3$ )  $\delta$  7.91 – 7.82 (m, 2H), 7.56 (dd,  $J = 8.5, 1.1$  Hz, 2H), 7.53 – 7.44 (m, 4H), 7.45 – 7.40 (m, 3H), 7.34 (dd,  $J = 8.6, 1.6$  Hz, 2H), 6.85 (d,  $J = 8.6$  Hz, 1H), 3.89 (s, 2H).  $^{13}\text{C}$  NMR (101 MHz,  $\text{CDCl}_3$ )  $\delta$  143.14, 142.98, 135.52, 132.10, 131.35, 129.51, 129.48, 128.54, 126.52, 125.92, 124.85, 118.97, 112.57, 105.15, 27.75. **HR-MS** (ESI)  $m/z$  calcd for  $\text{C}_{21}\text{H}_{16}\text{N}_3^+$   $[\text{M}+\text{H}^+]$  310.1344, found: 310.1339

#### 1-methyl-3-phenylcinnolin-4(1H)-one (9a)

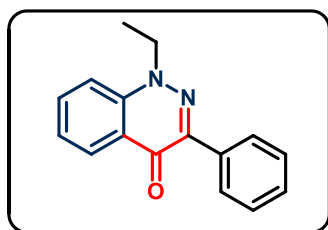

Greenish yellow solid (0.25 mmol scale, 56.4 mg, 91%), mp 210-220 °C;  $^1\text{H}$  NMR (400 MHz,  $\text{CDCl}_3$ )  $\delta$  8.47 (dd,  $J = 8.2, 1.4$  Hz, 1H), 8.23 – 8.14 (m, 2H), 7.73 (m, 1H), 7.53 – 7.37 (m, 5H), 4.56 (q,  $J = 7.2$

Hz, 2H), 1.58 (t,  $J = 7.2$  Hz, 3H).  $^{13}\text{C}$  NMR (101 MHz,  $\text{CDCl}_3$ )  $\delta$  169.83, 145.86, 140.11, 134.65, 133.44, 128.64, 128.54, 128.03, 126.94, 125.48, 124.51, 114.62, 50.93, 13.77. **HR-MS** (ESI)  $m/z$  calcd for  $\text{C}_{16}\text{H}_{15}\text{N}_2\text{O}^+$   $[\text{M}+\text{H}^+]$  251.1184, found: 251.1179

**1-methyl-3-phenylcinnolin-4(1H)-one (9b)**

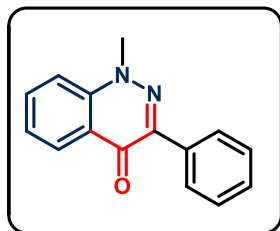

Greenish yellow solid (0.25mmol scale, 51.9mg, 88%) mp 200-205°C;  $^1\text{H}$  NMR (400 MHz,  $\text{CDCl}_3$ )  $\delta$  8.50 – 8.43 (m, 1H), 8.21 – 8.09 (m, 2H), 7.75 (m, 1H), 7.50 – 7.35 (m, 5H), 4.19 (s, 3H).  $^{13}\text{C}$  NMR (101 MHz,  $\text{CDCl}_3$ )  $\delta$  169.98, 145.94, 140.98, 134.47, 133.55, 128.69, 128.50, 128.05, 126.68, 125.17, 124.73, 114.76, 43.85. **HR-MS** (ESI)  $m/z$  calcd for  $\text{C}_{15}\text{H}_{13}\text{N}_2\text{O}^+$   $[\text{M}+\text{H}^+]$  237.1028, found: 237.1022.

## 4. References

1. (a) R. M. P. Dias and A. C. B. Burtoloso, *Org. Lett.*, 2016, **18**, 3034–3037. (b) M. Barday, C. Janot, N. R. Halcovitch, J. Muir and C. Aïssa, *Angew. Chemie Int. Ed.*, 2017, **56**, 13117–13121.
2. (a) T. Leischner, L. Artús Suarez, A. Spannenberg, K. Junge, A. Nova and M. Beller, *Chem. Sci.*, 2019, **10**, 10566–10576. (b) P. Chaudhary, S. Gupta, N. Muniyappan, S. Sabiah and J. Kandasamy, *Green Chem.*, 2016, **18**, 2323–2330. (c) L. Zhang, J. Chen, X. Chen, X. Zheng, J. Zhou, T. Zhong, Z. Chen, Y.-F. Yang, X. Jiang, Y.-B. She and C. Yu, *Chem. Commun.*, 2020, **56**, 7415–7418. (d) P. Chaudhary, S. Gupta, P. Sureshbabu, S. Sabiah and J. Kandasamy, *Green Chem.*, 2016, **18**, 6215–6221. (e) Y. Huang, P. Y. Choy, J. Wang, M.-K. Tse, R. W.-Y. Sun, A. S.-C. Chan and F. Y. Kwong, *J. Org. Chem.*, 2020, **85**, 14664–14673.

GP-G-384

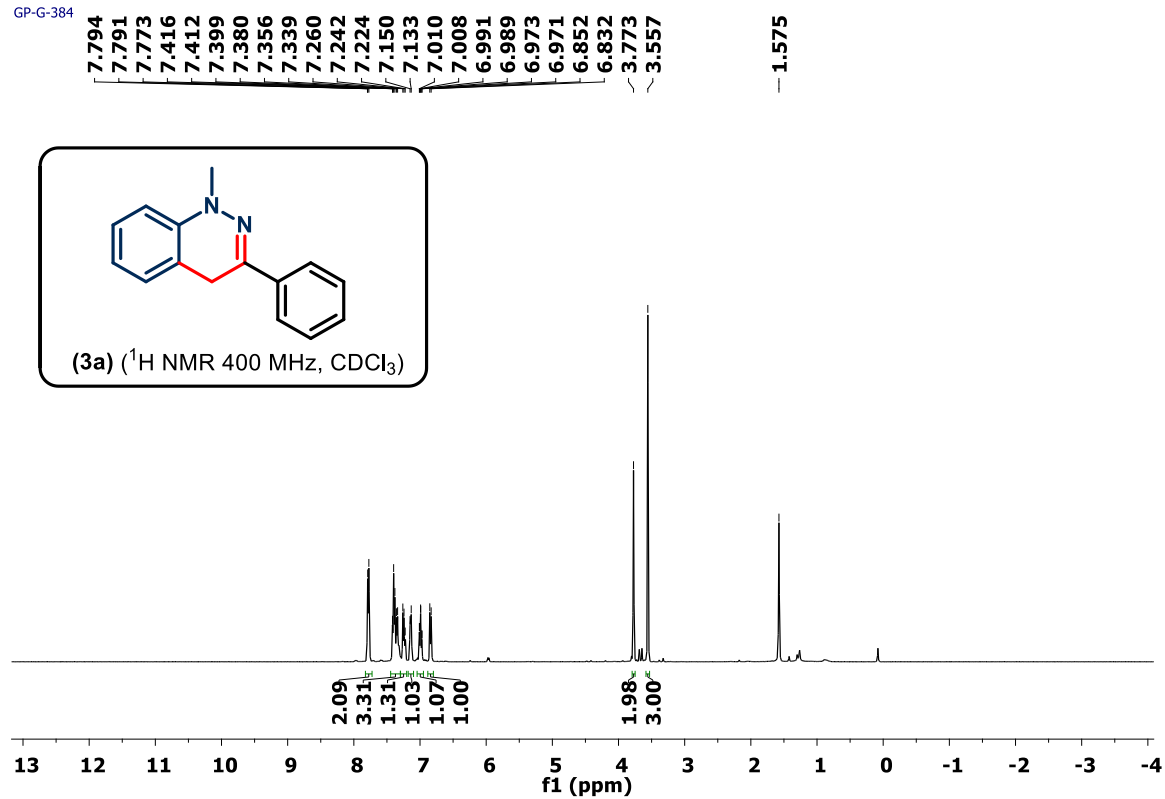

GP-G-384

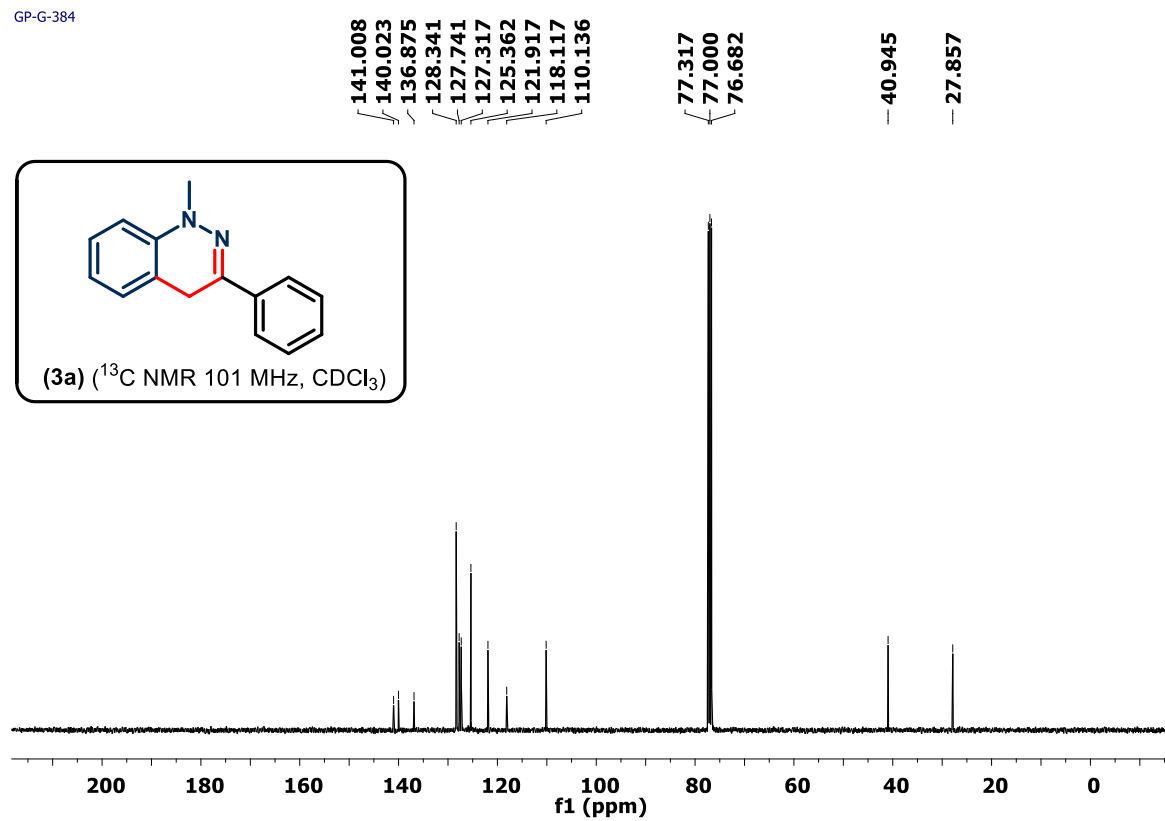



gp-g-533

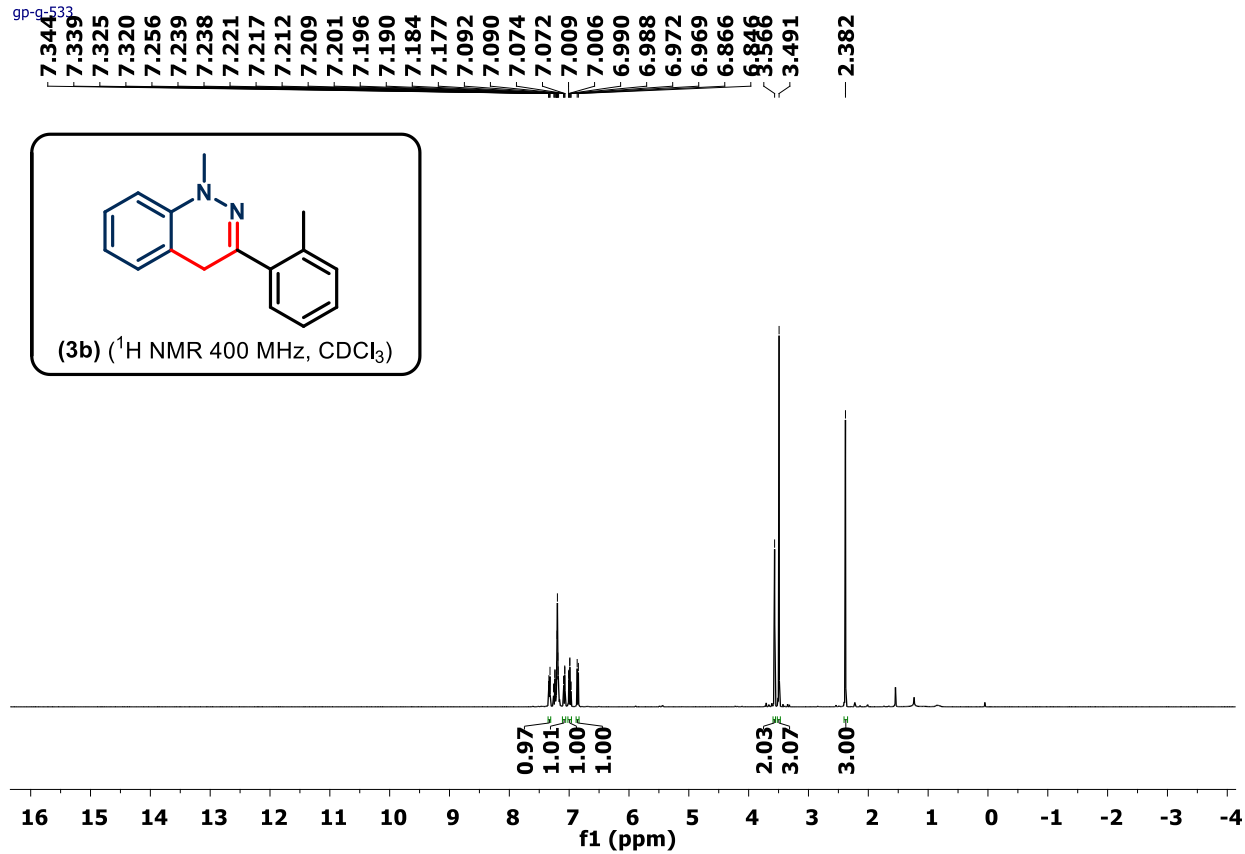

gp-g-533

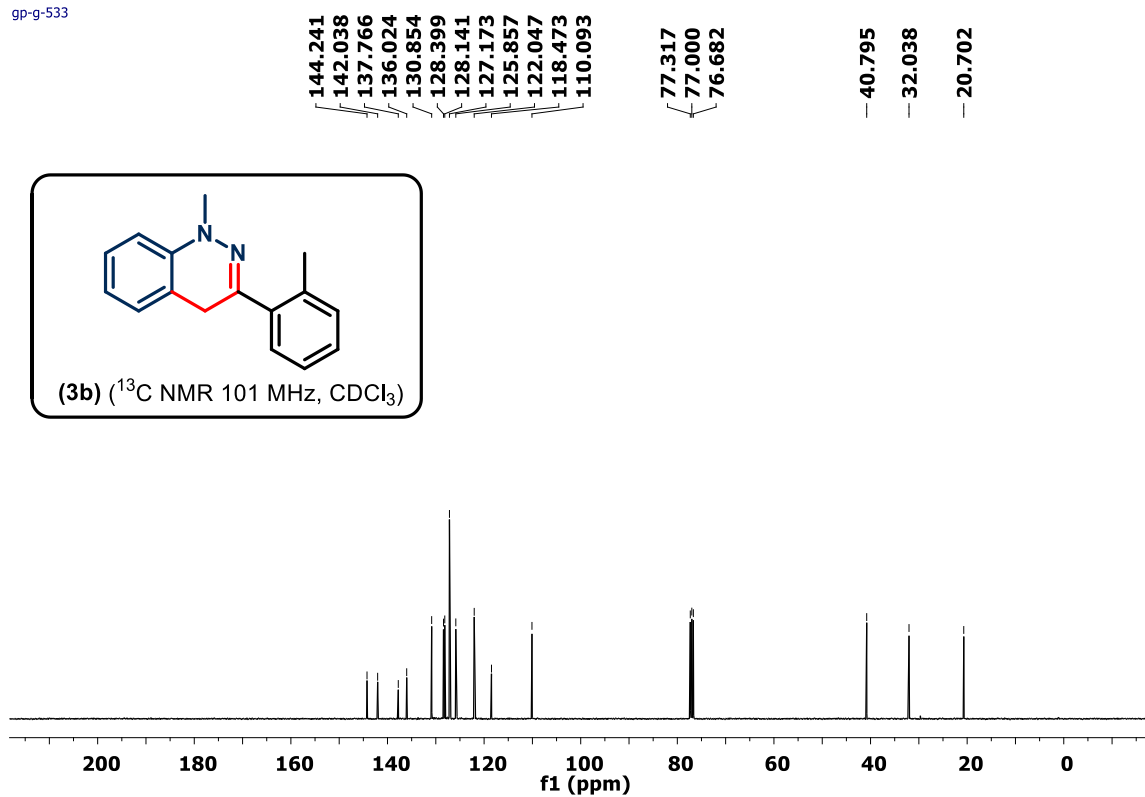

GP-G-P-METHOXY

7.647  
7.625  
7.164  
7.160  
7.143  
7.142  
7.125  
7.122  
7.051  
7.049  
7.032  
6.885  
6.883  
6.843  
6.837  
6.826  
6.820  
6.750  
6.730  
3.744  
3.635  
3.444

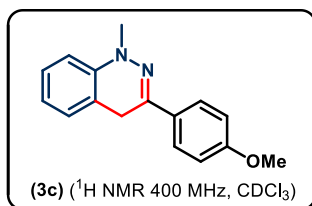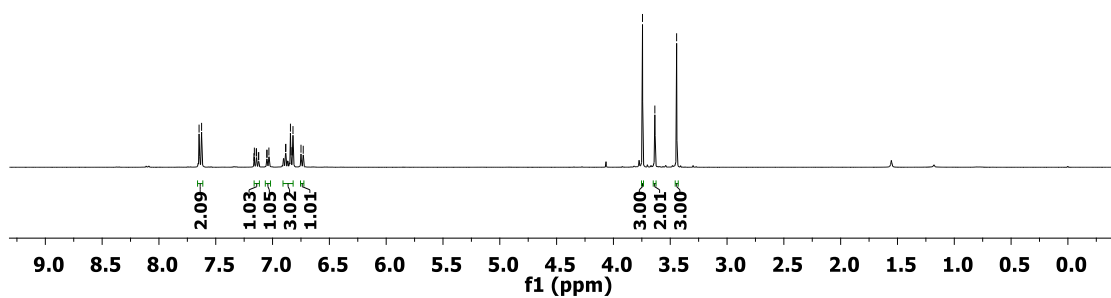

GP-G-P-METHOXY

159.987  
141.306  
140.150  
129.698  
127.701  
127.282  
126.816  
121.703  
118.204  
113.772  
110.092  
77.375  
77.057  
76.740  
55.347  
40.938  
28.013

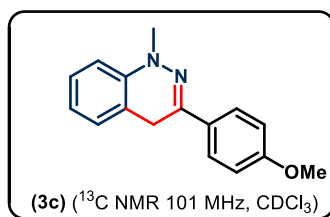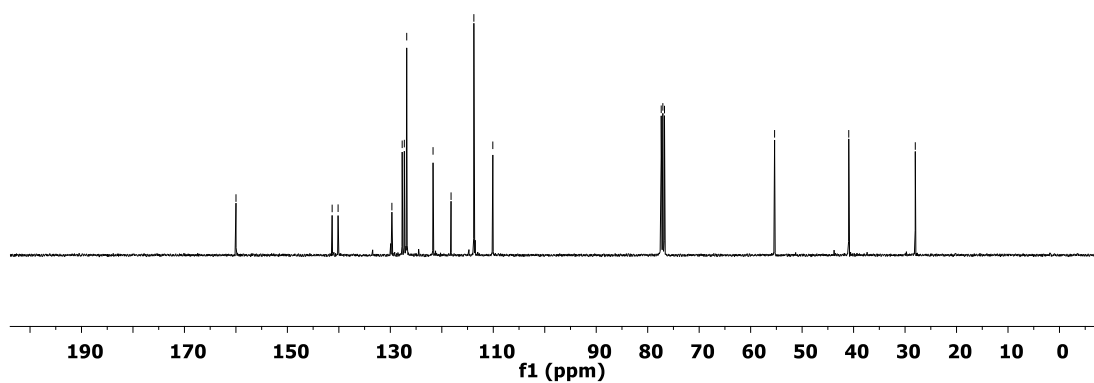

GP-G-581

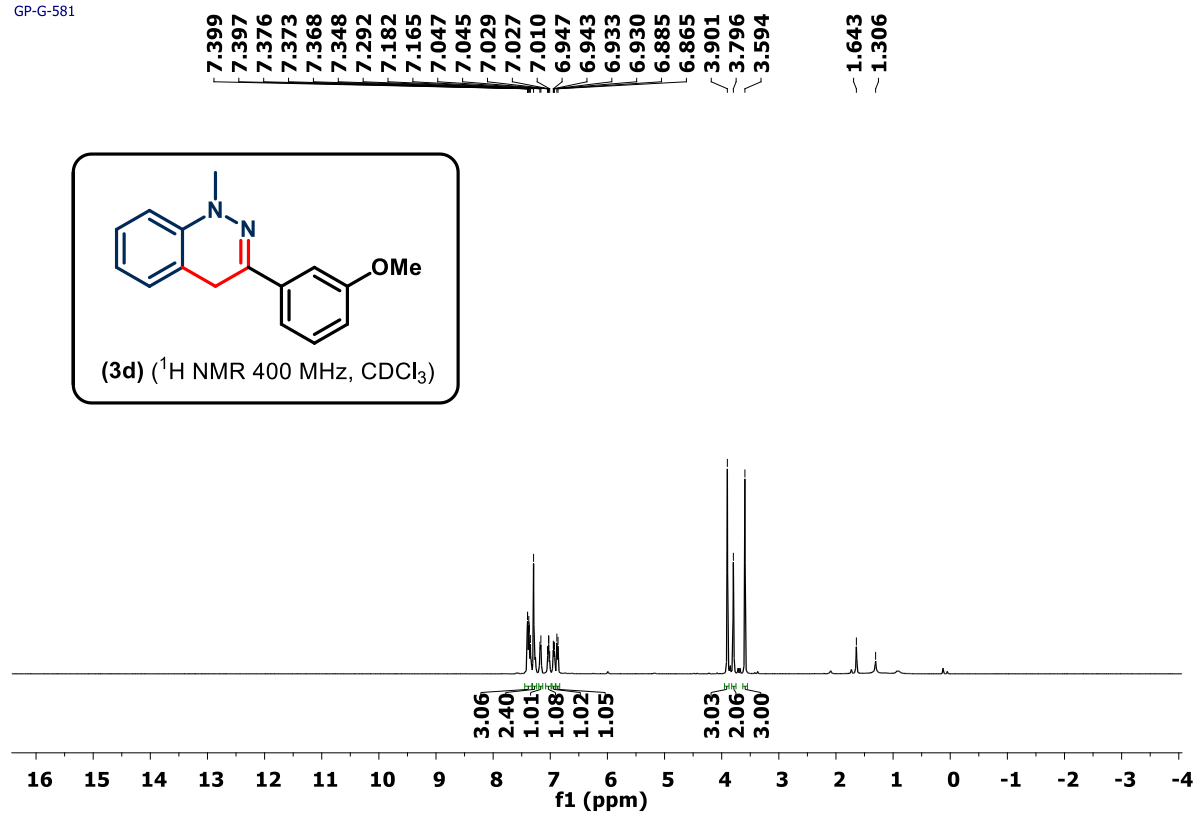

GP-G-581B

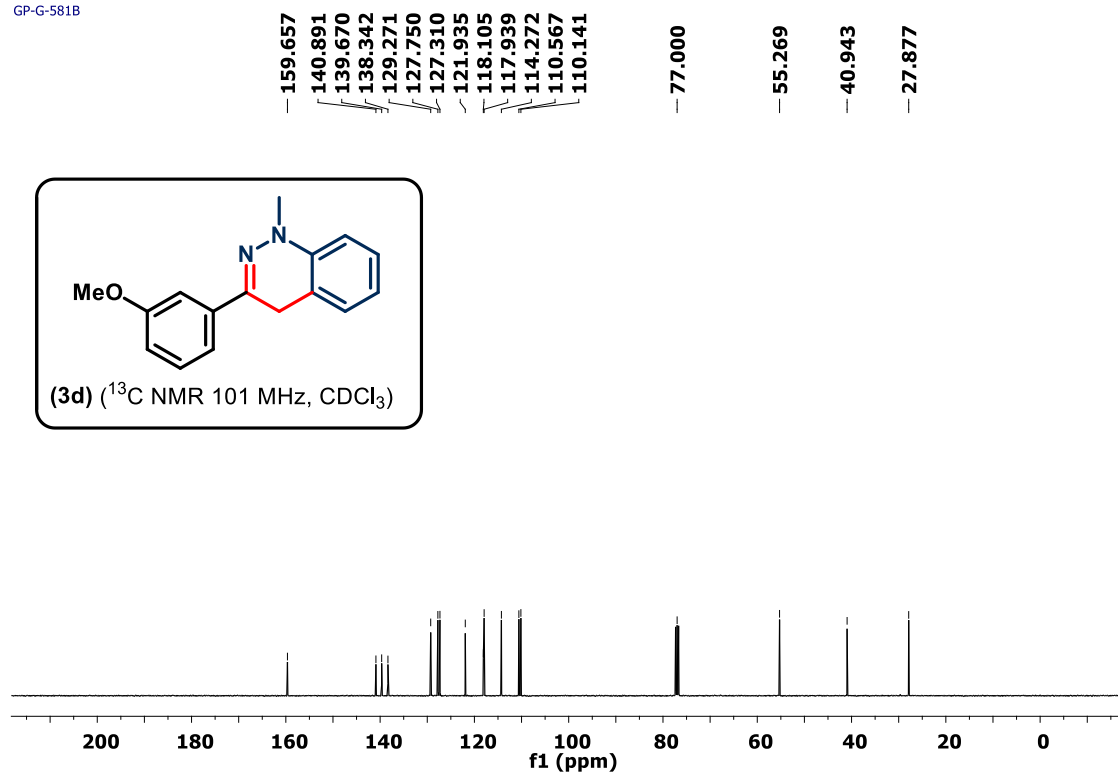

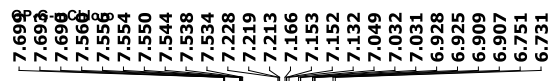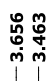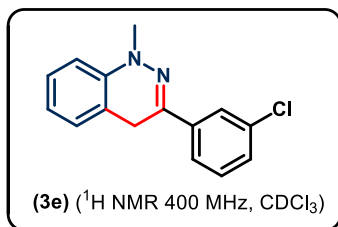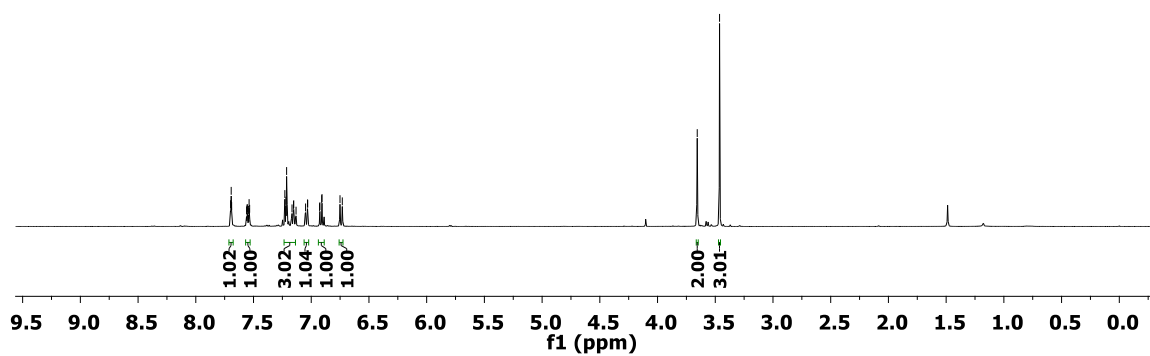

GP-G-mChloro

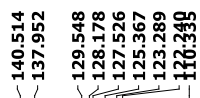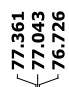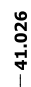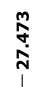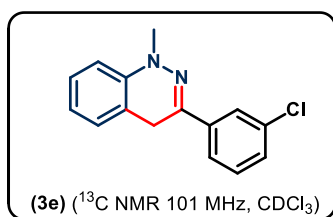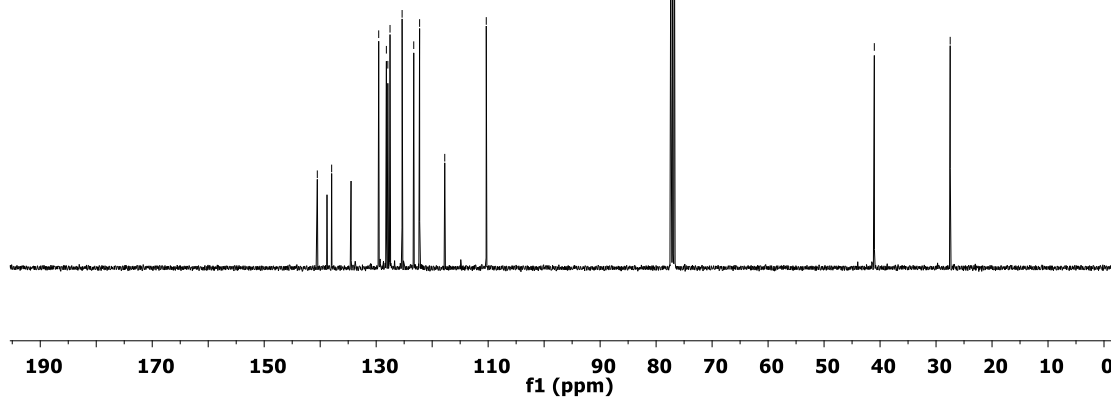

GP-PM-368A

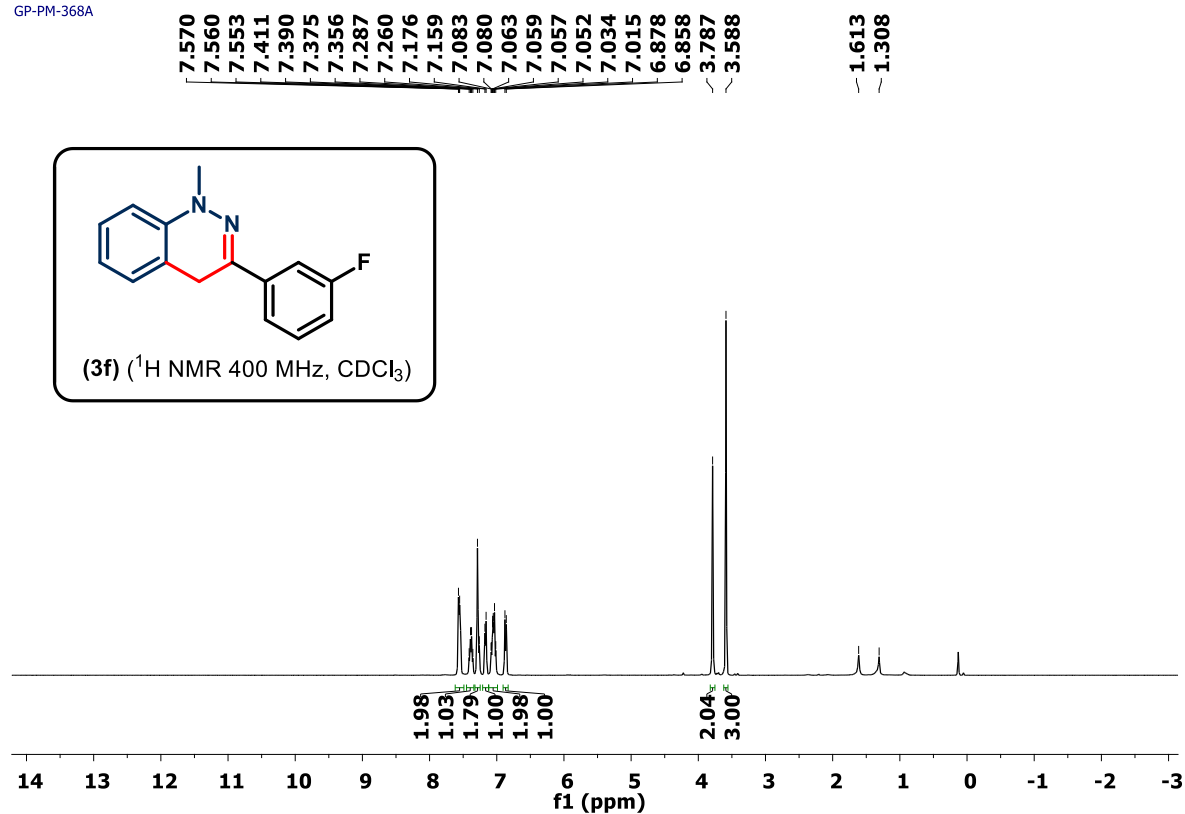

GP-PM-368A

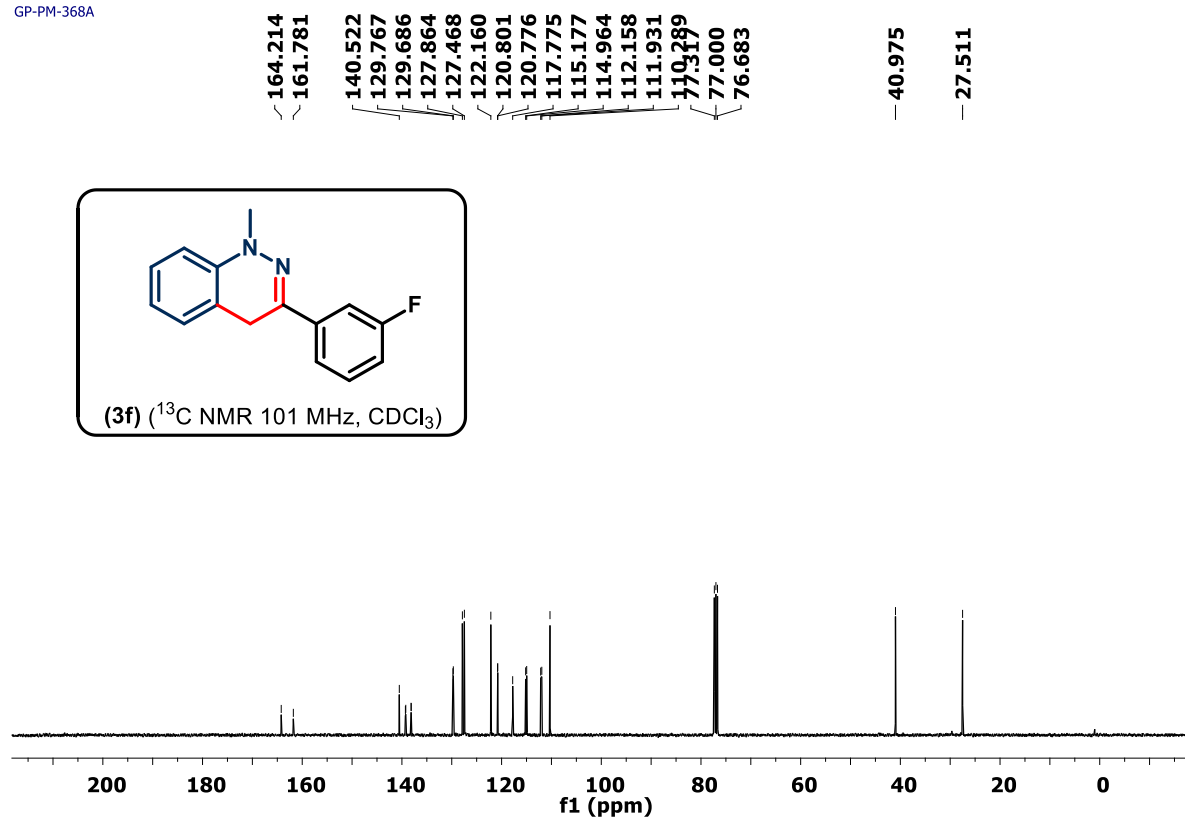

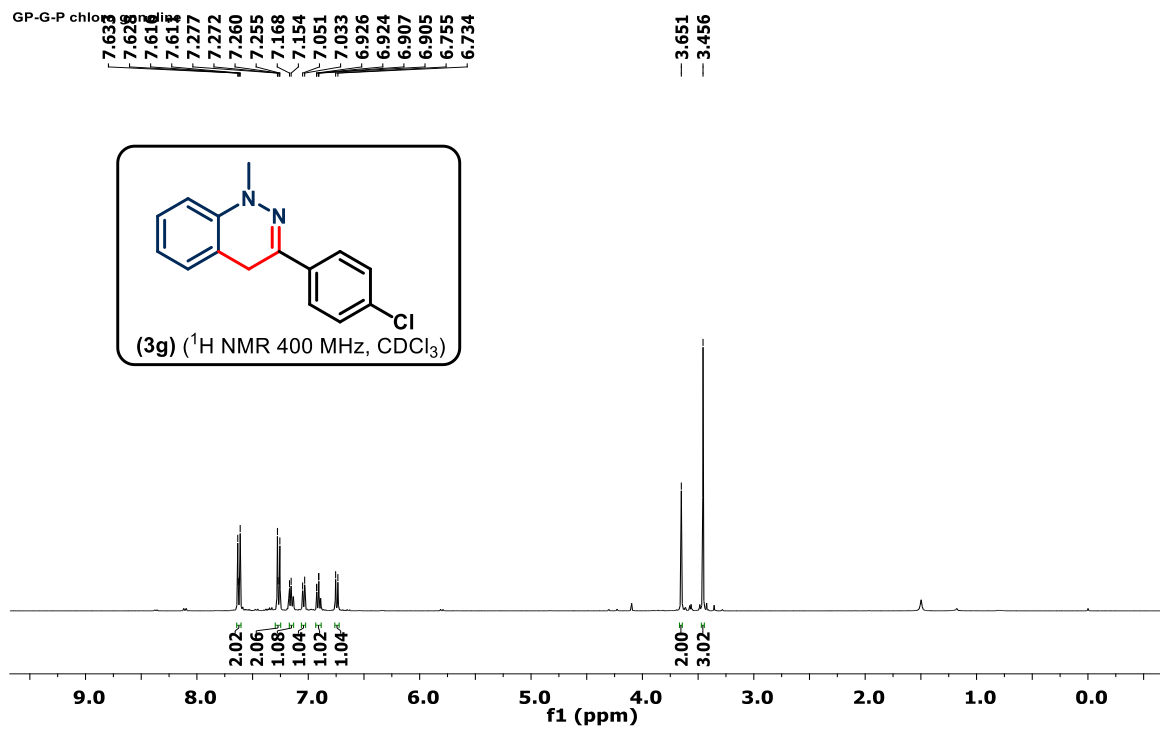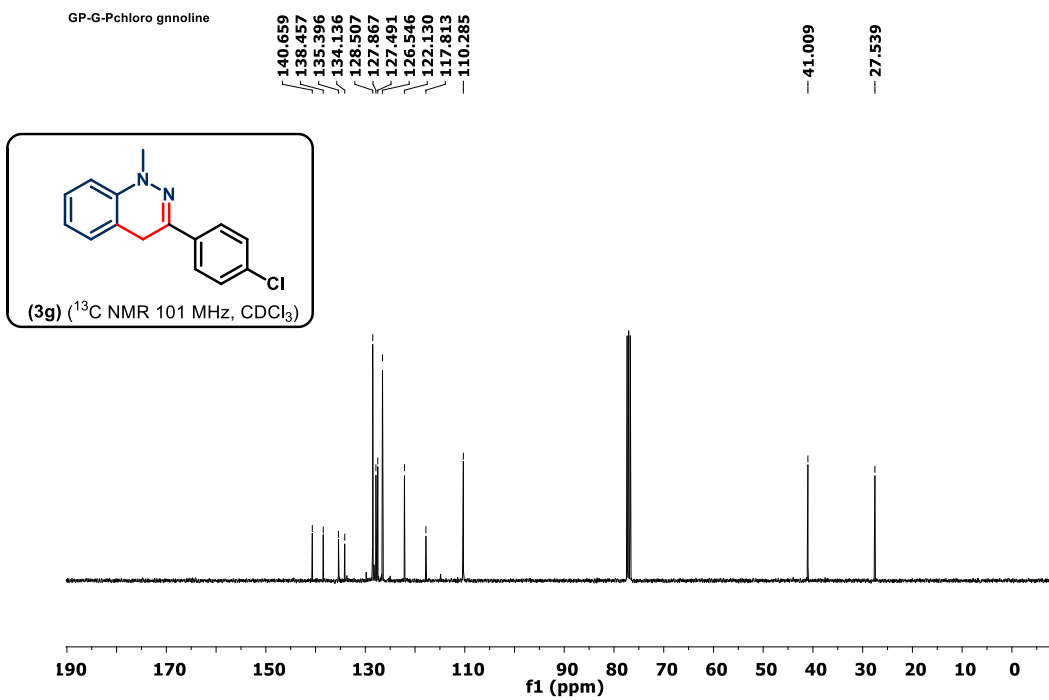

GP-PM-423A

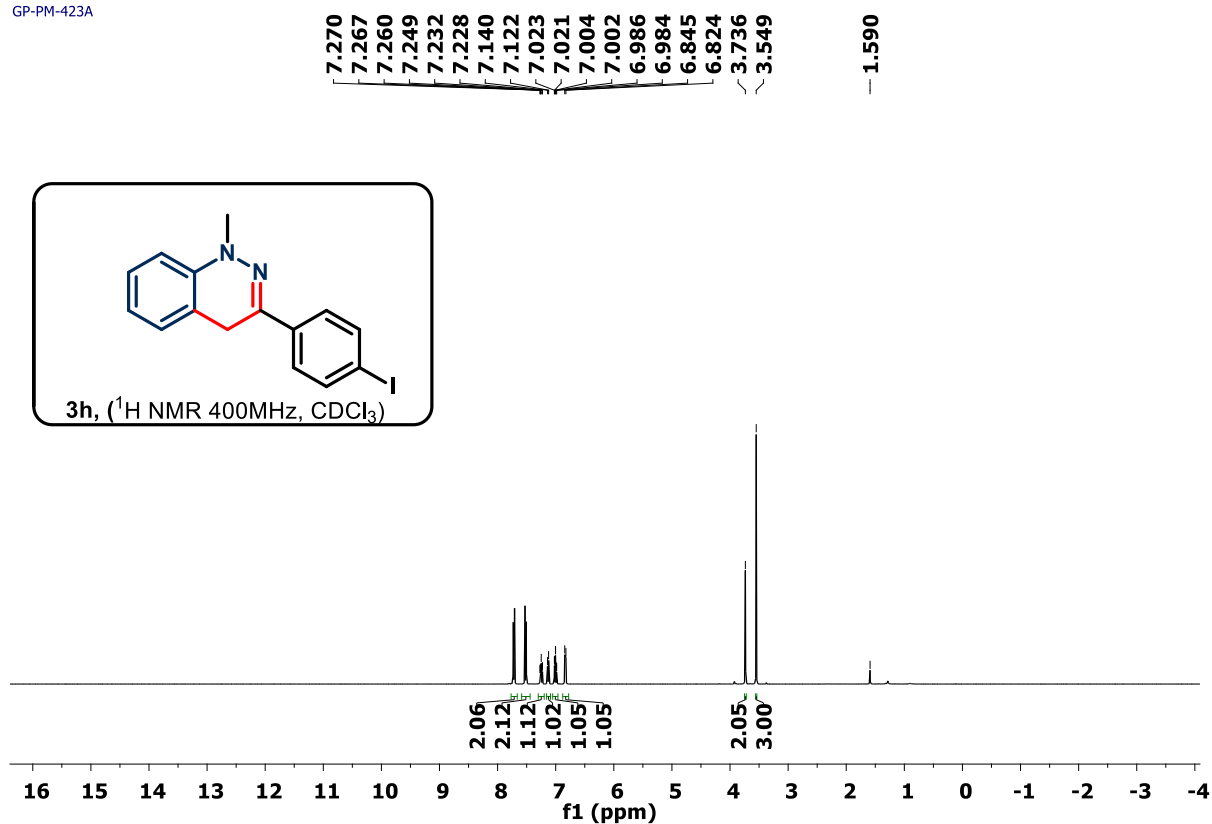

GP-PM-423A

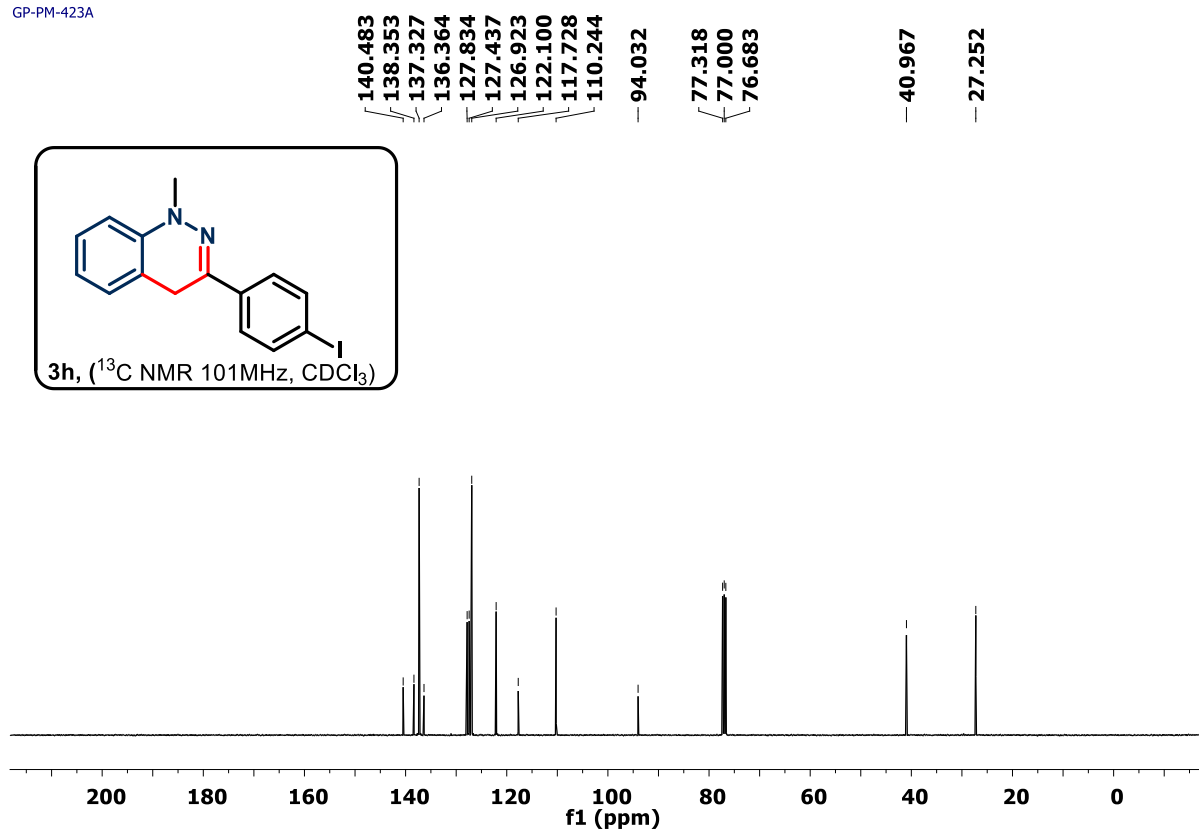

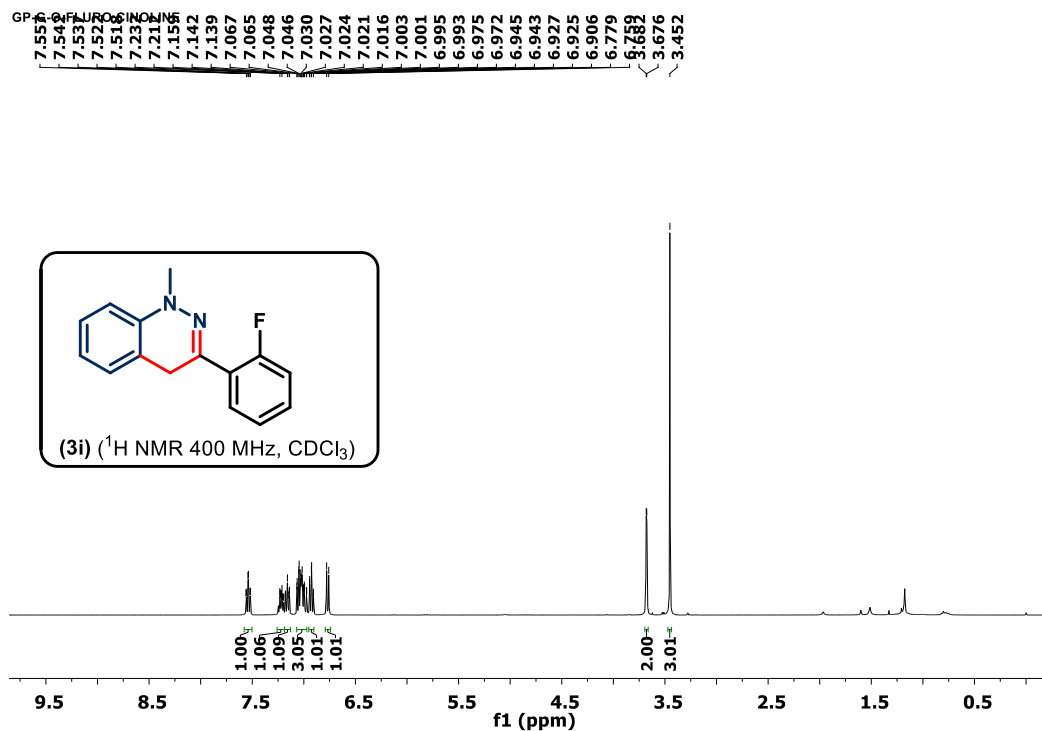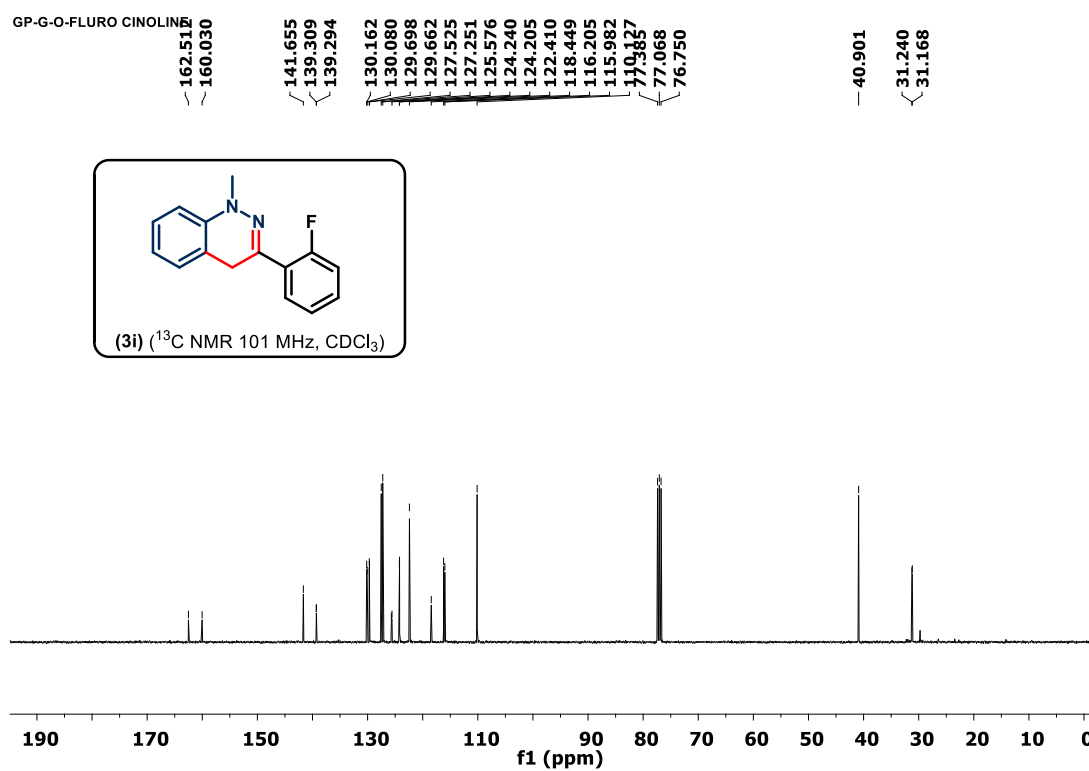



GP-PM-414A

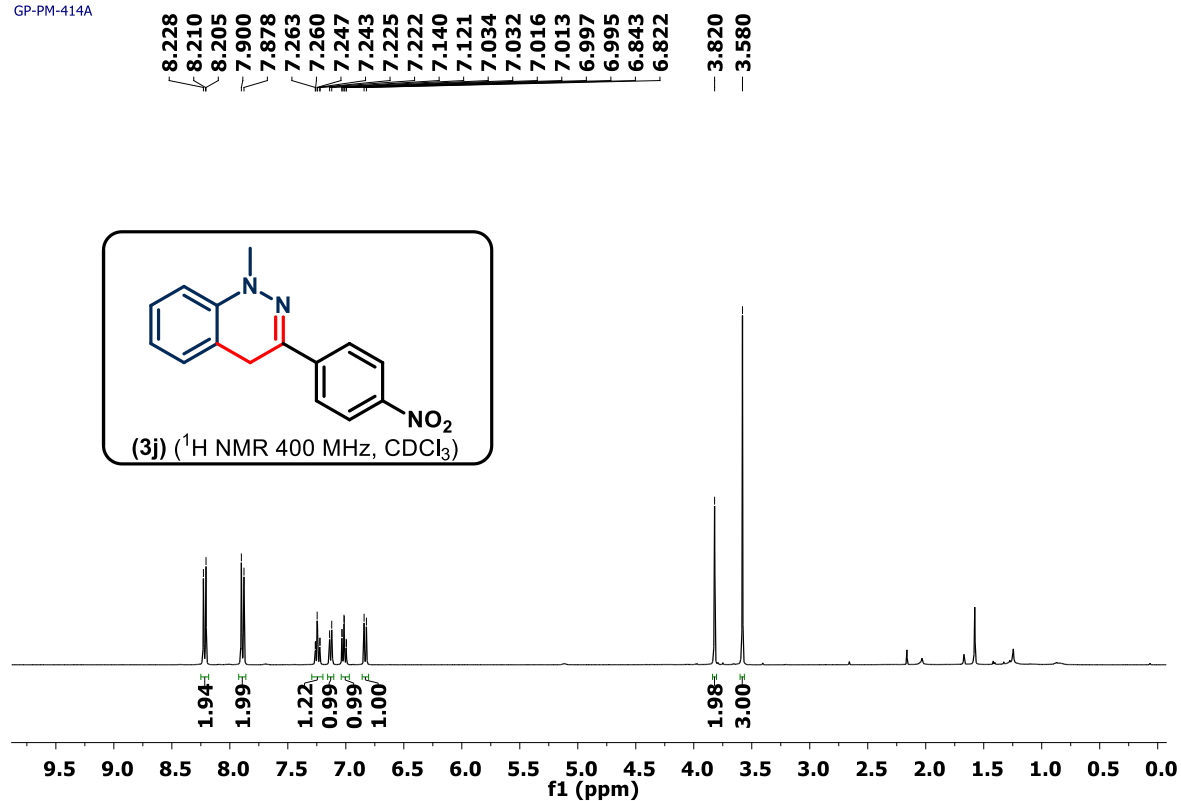

GP-PM-414A

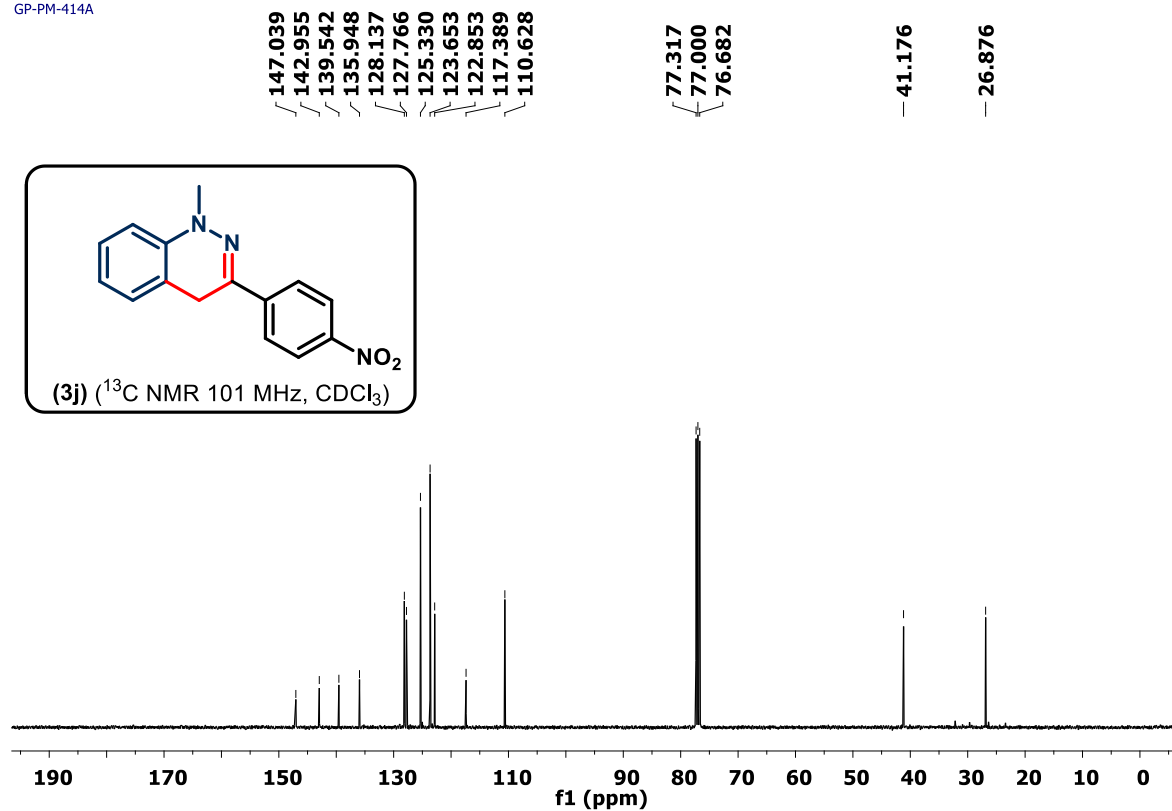

GP-G-531

8.51  
8.09  
8.09  
8.07  
8.07  
8.06  
7.48  
7.46  
7.44  
7.19  
7.18  
7.16  
7.16  
7.09  
7.07  
6.96  
6.96  
6.94  
6.94  
6.92  
6.92  
6.78  
6.75  
3.50

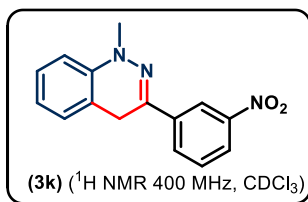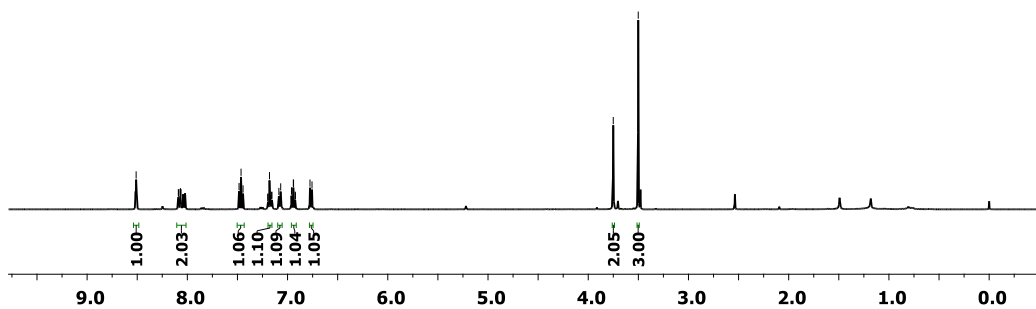

GP-G-531

148.517  
139.937  
138.710  
136.214  
130.662  
129.153  
128.070  
127.709  
122.573  
122.535  
119.805  
117.320  
110.518

77.317  
77.000  
76.683

41.087

27.092

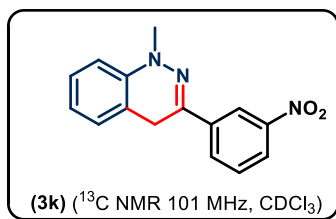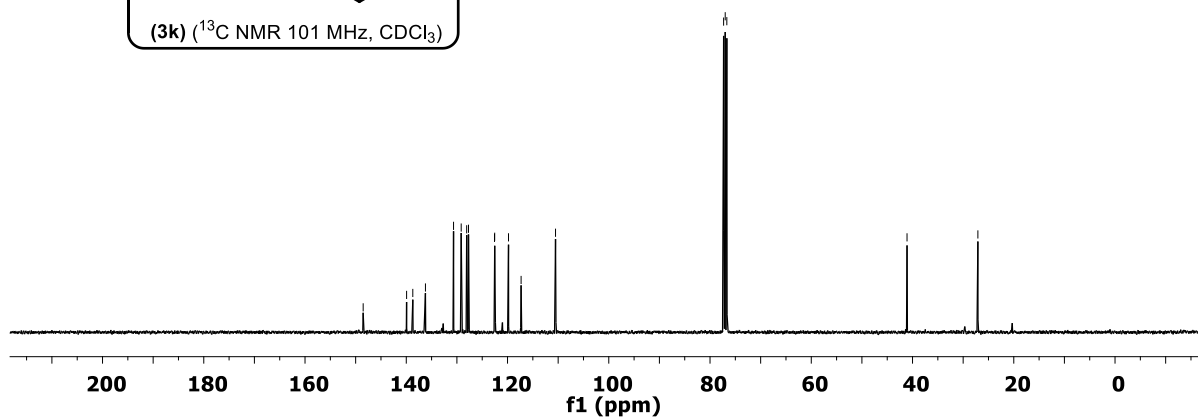

GP-G-451

7.195  
7.19  
7.19  
7.18  
7.18  
7.16  
7.15  
7.15  
7.08  
7.06  
6.98  
6.97  
6.96  
6.96  
6.93  
6.93  
6.91  
6.91  
6.89  
6.89  
6.77  
6.75

— 3.71  
— 3.45

— 1.50

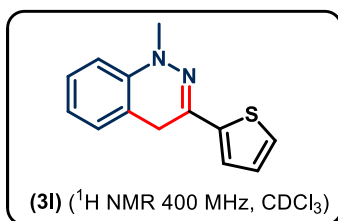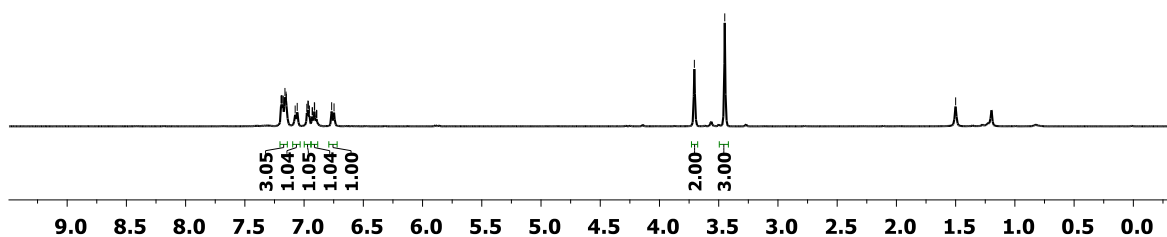

GP-G-451

142.515  
140.788  
136.222  
127.807  
127.409  
127.092  
126.067  
124.171  
121.872  
117.720  
110.472

77.317  
77.000  
76.682

— 40.865

— 28.158

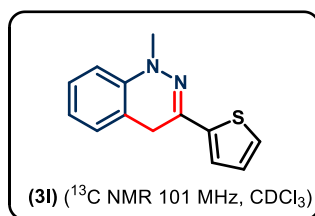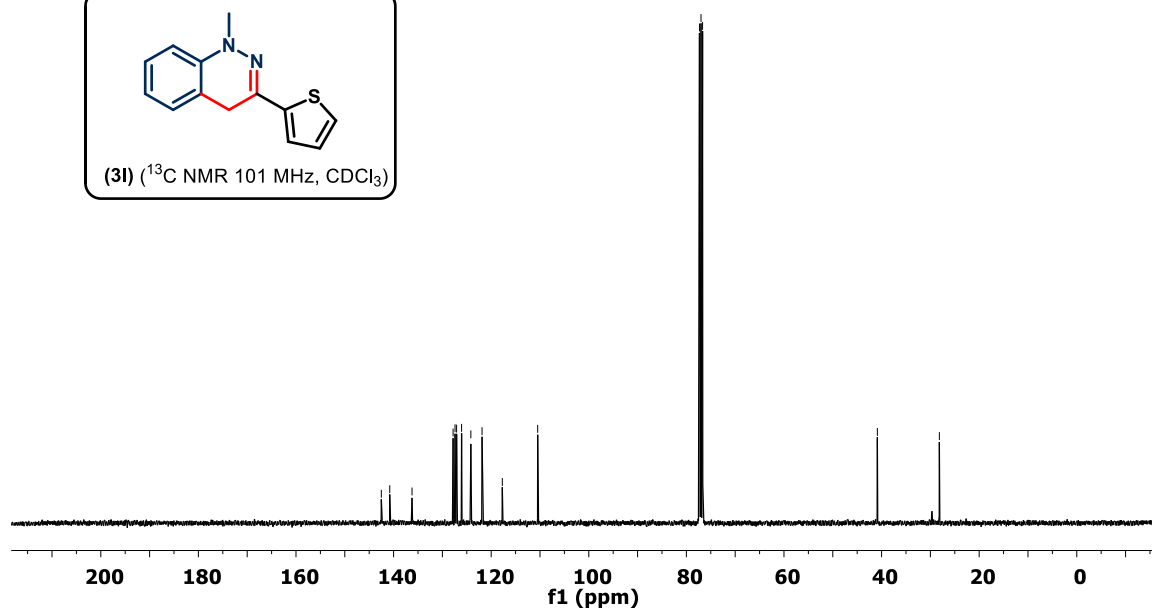

GP-G-532

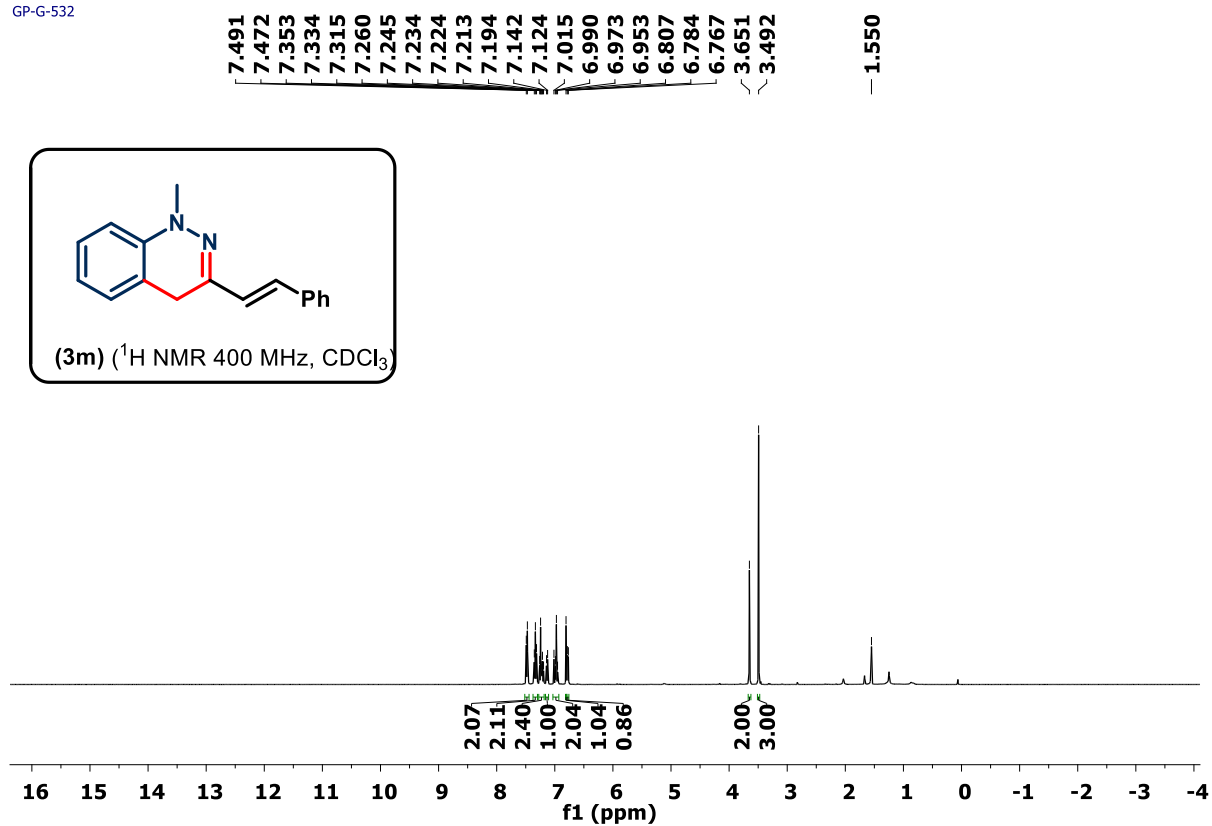

GP-G-532

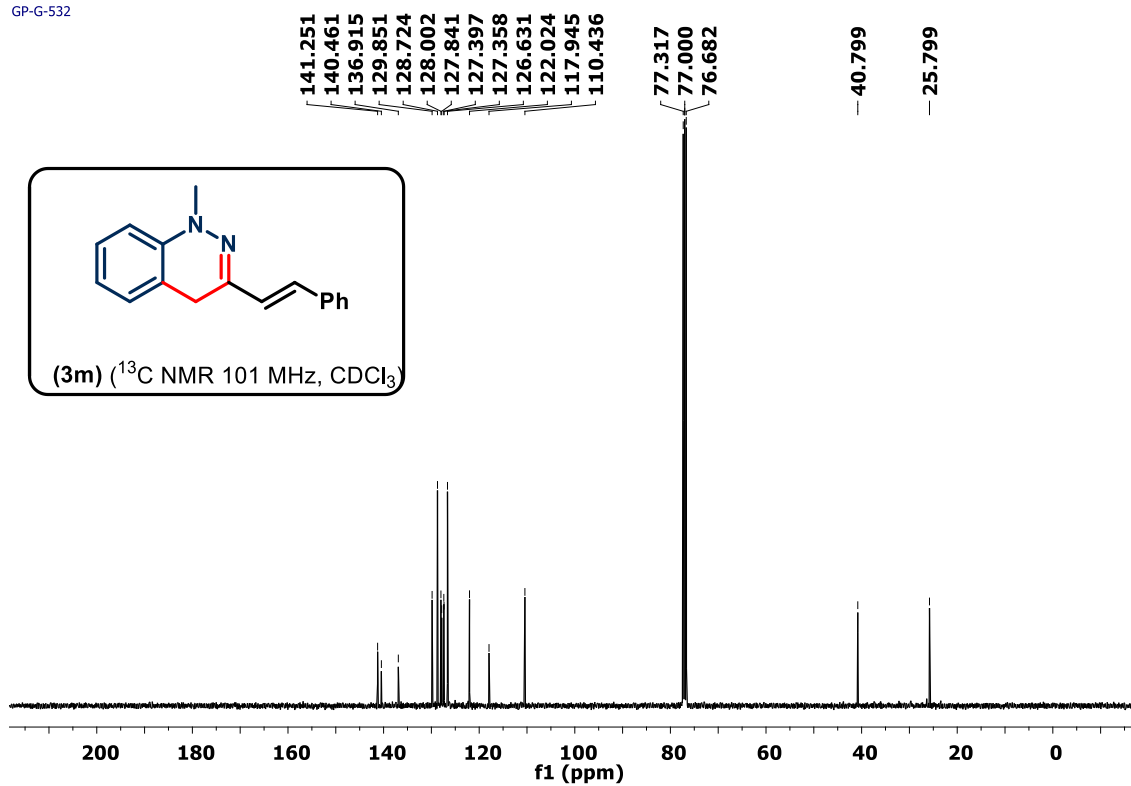

GP-G-439

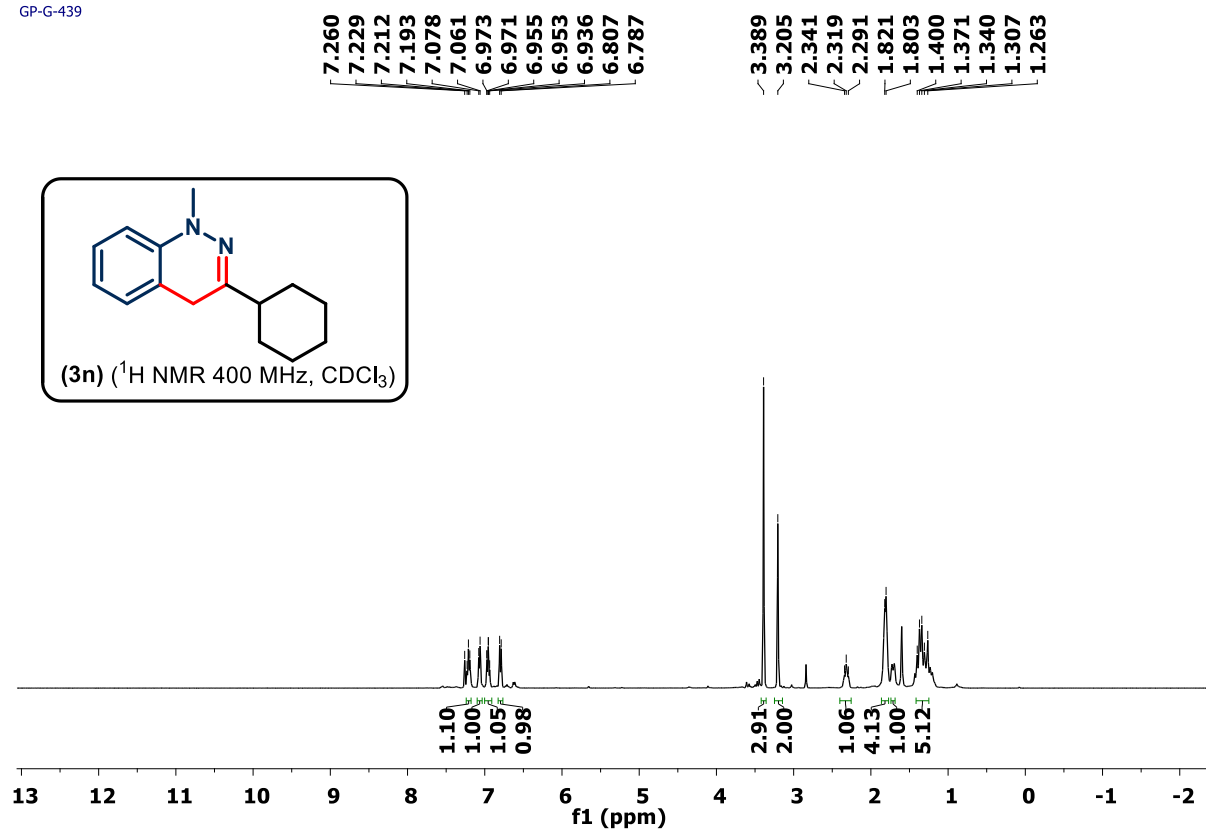

GP-G-439

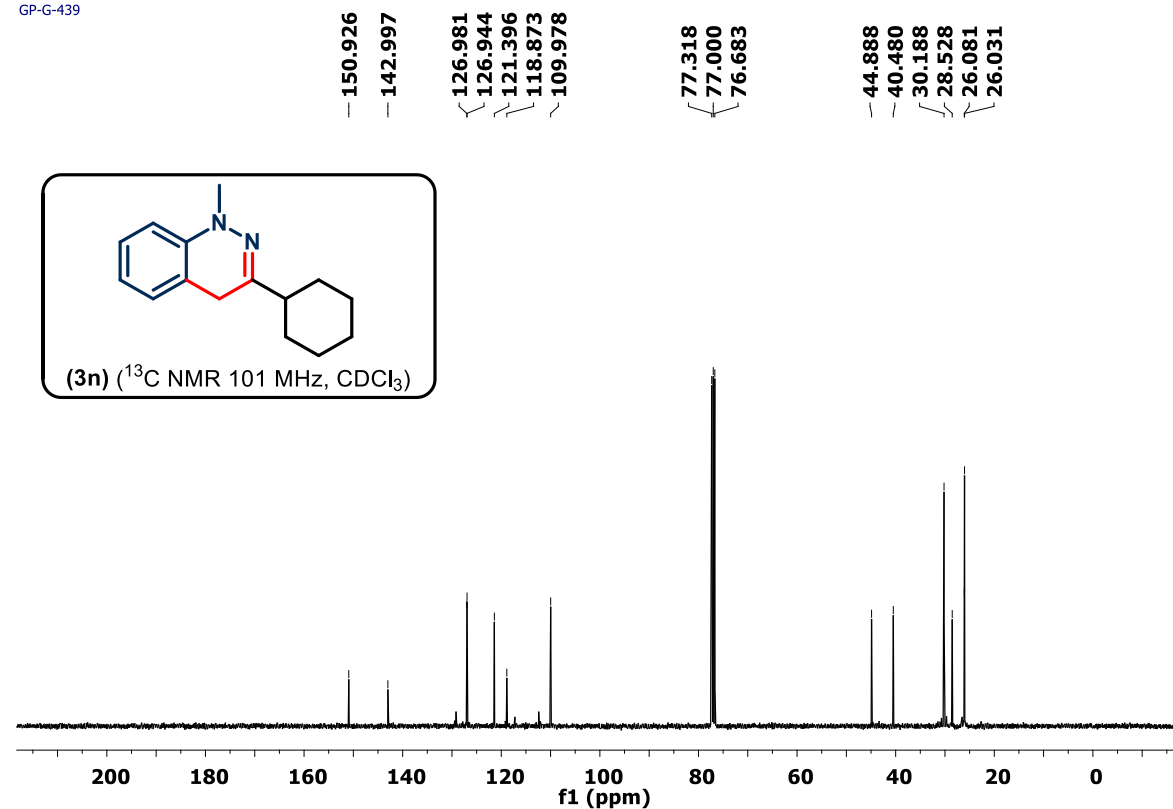

GP-G-442

7.18  
7.15  
7.13  
6.99  
6.97  
6.92  
6.91  
6.90  
6.76  
6.74

3.34  
3.15

2.20

1.19  
0.91

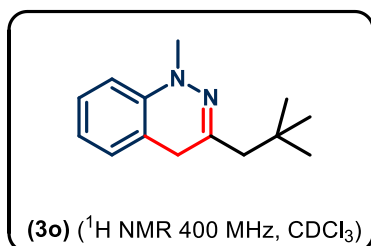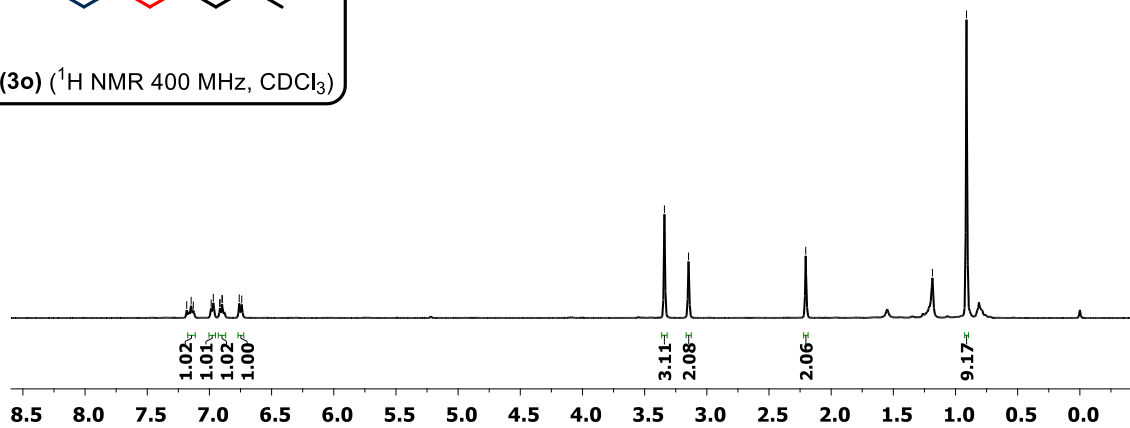

GP-G-442

146.066  
142.825

126.882  
126.776  
121.635  
118.815  
109.914

77.317  
77.000  
76.682

49.808  
40.498  
33.463  
31.881  
29.928

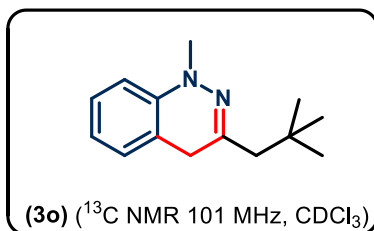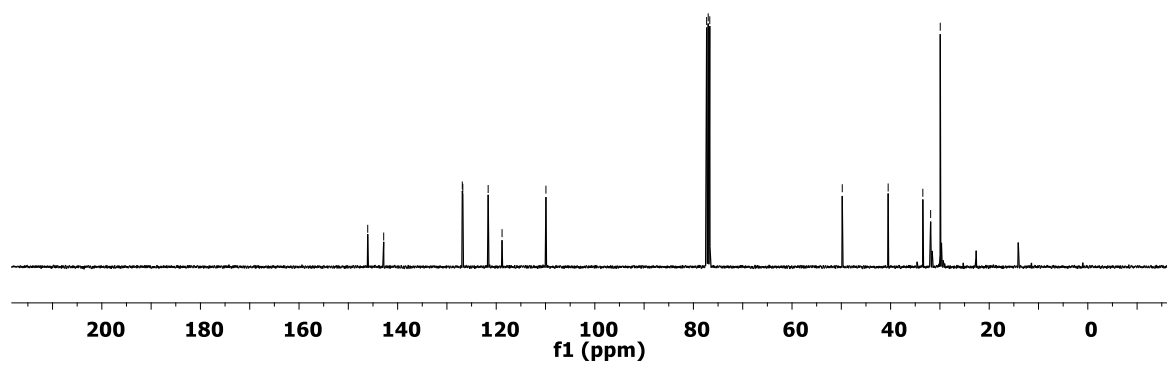

GP-G445

7.26  
7.22  
7.11  
7.09  
6.97  
6.96  
6.82  
6.80

3.40  
3.21

1.18

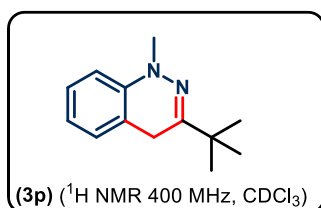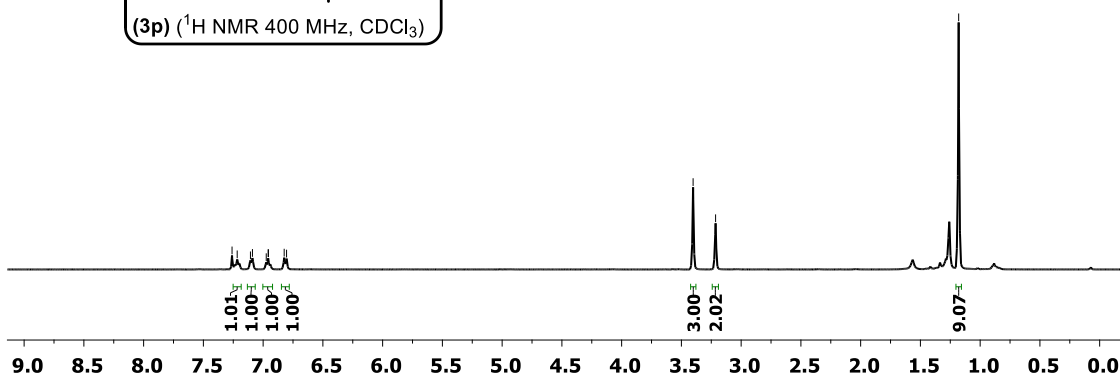

GP-G445

152.911  
143.111

126.859  
126.821  
121.285  
119.627  
109.889

77.317  
77.000  
76.682

40.626  
36.832  
29.690  
27.690  
27.240

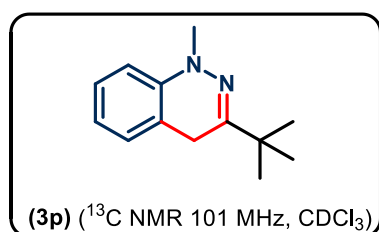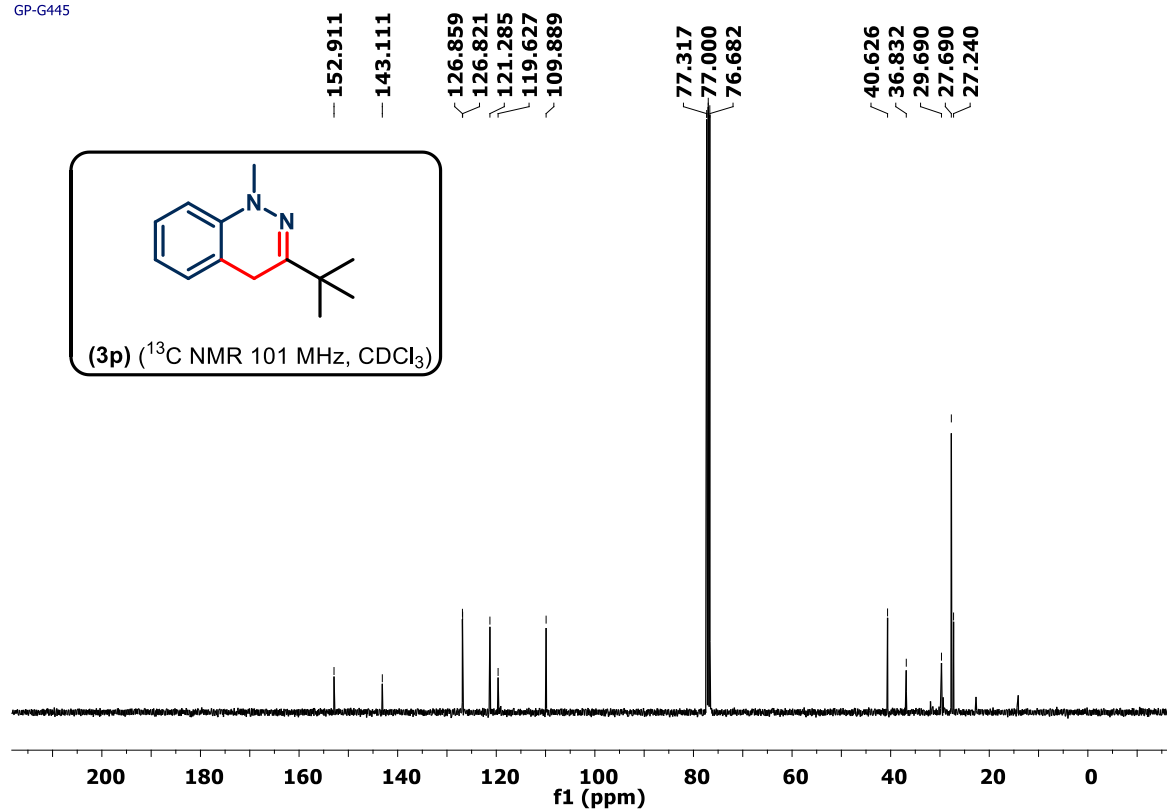

GP-PM-405A

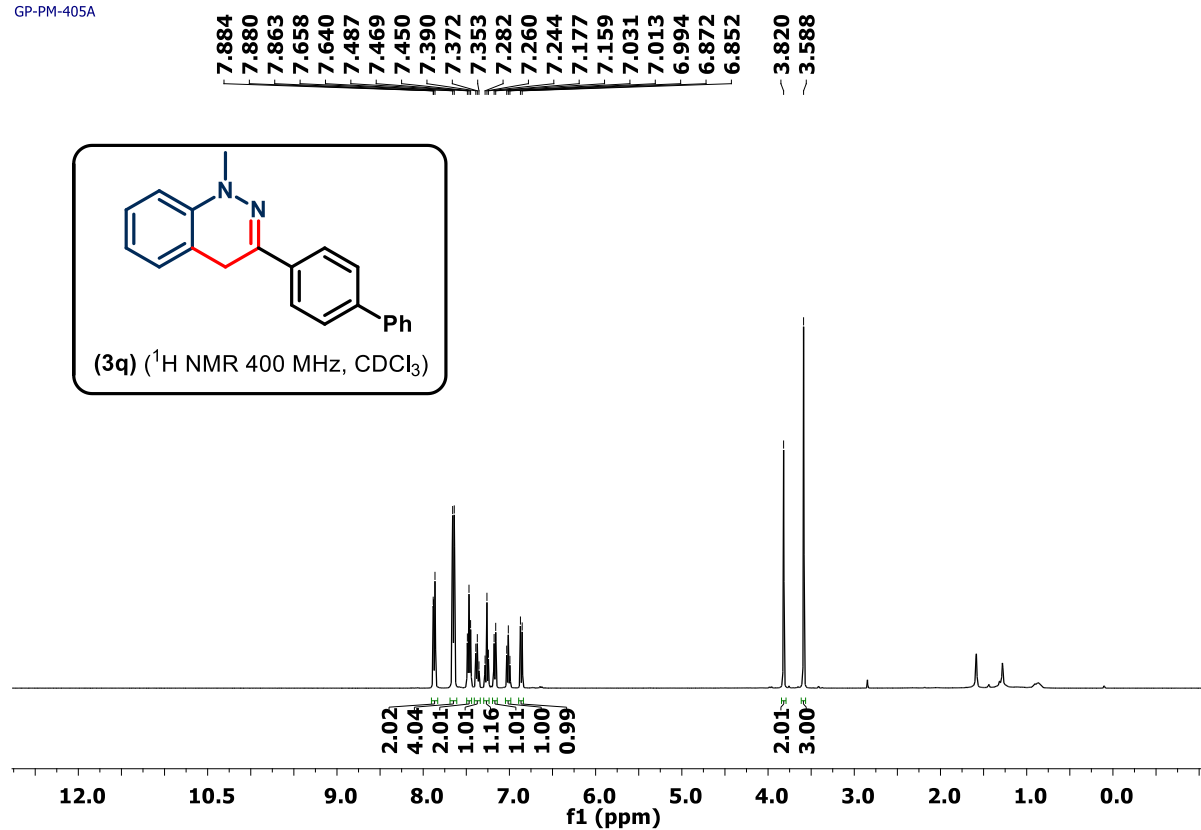

GP-PM-405A

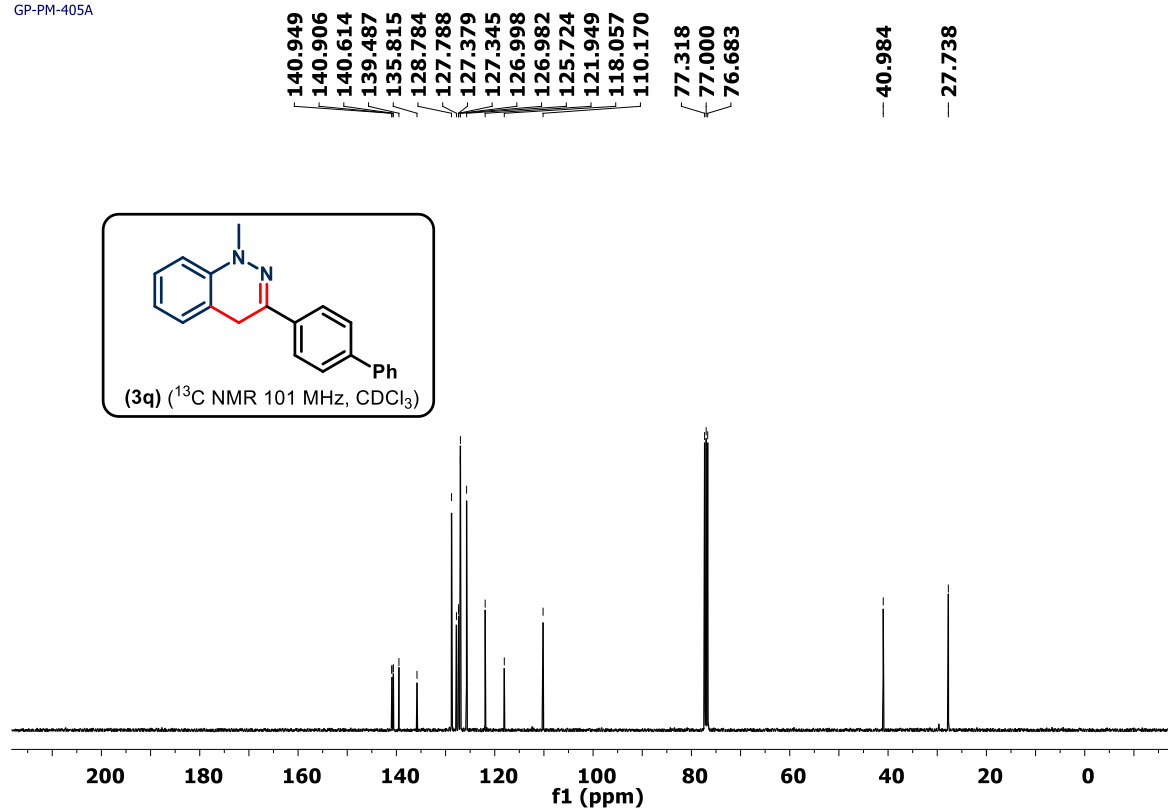



GP-G-603

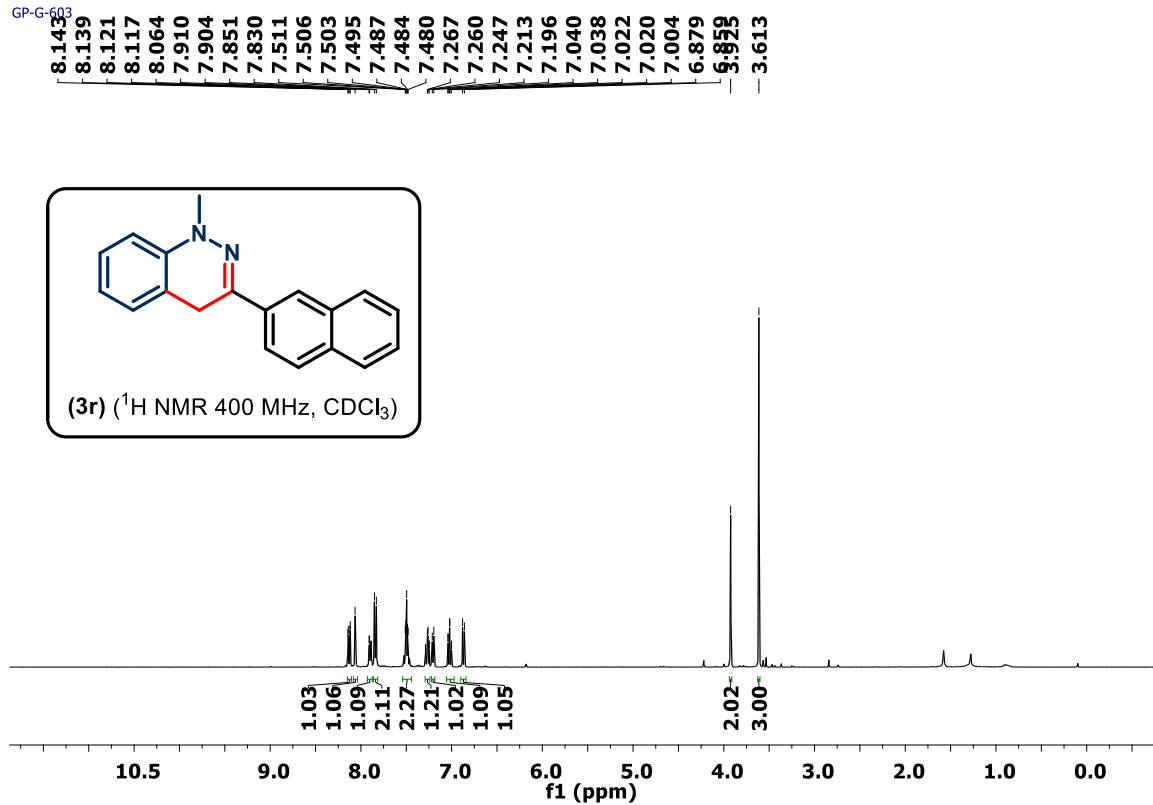

GP-G-603

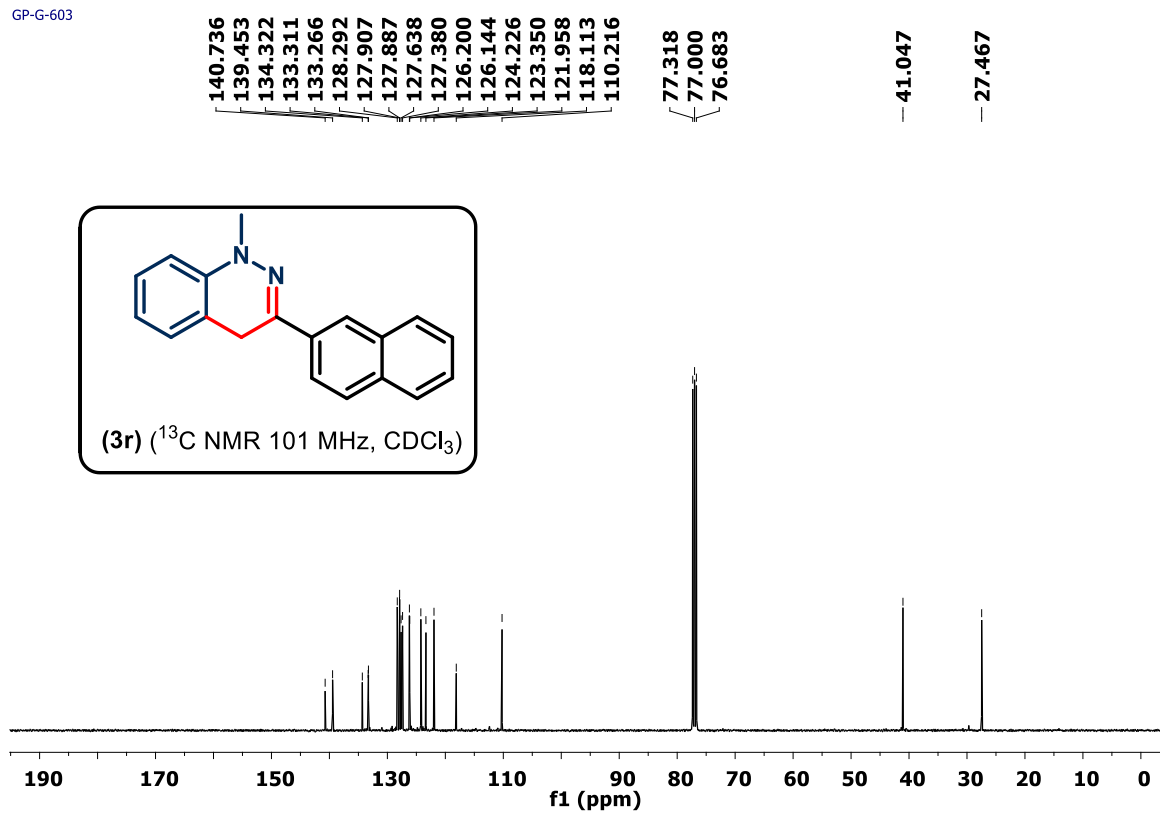

GP-G-534

7.27  
7.22  
7.11  
7.09  
6.98  
6.98  
6.96  
6.96  
6.83  
6.81

- 3.20

2.06  
1.84  
1.83  
1.76  
1.73

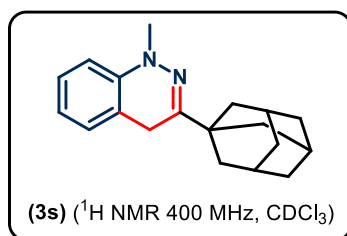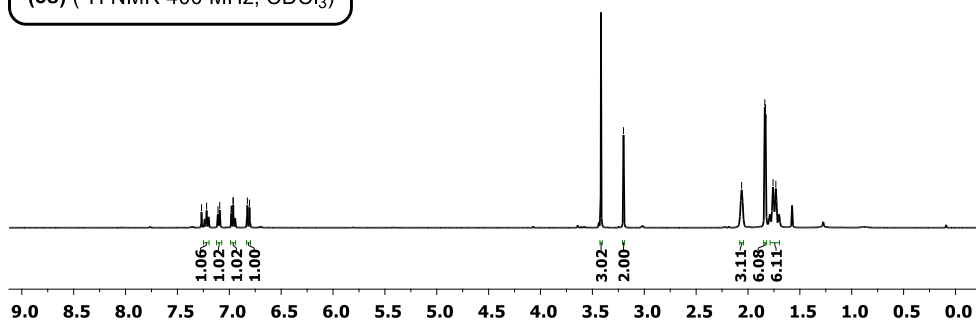

GP-G-534

- 153.239  
- 143.290  
126.835  
126.789  
121.298  
119.543  
109.832

77.317  
77.000  
76.683

40.600  
39.650  
38.646  
36.855  
28.263  
26.373

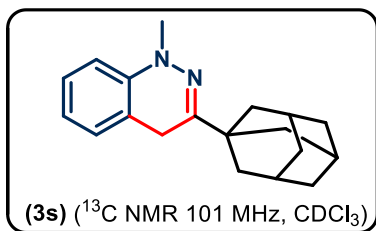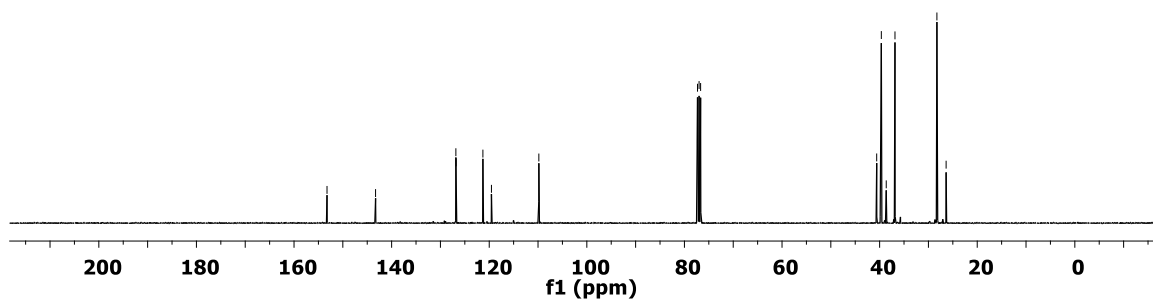

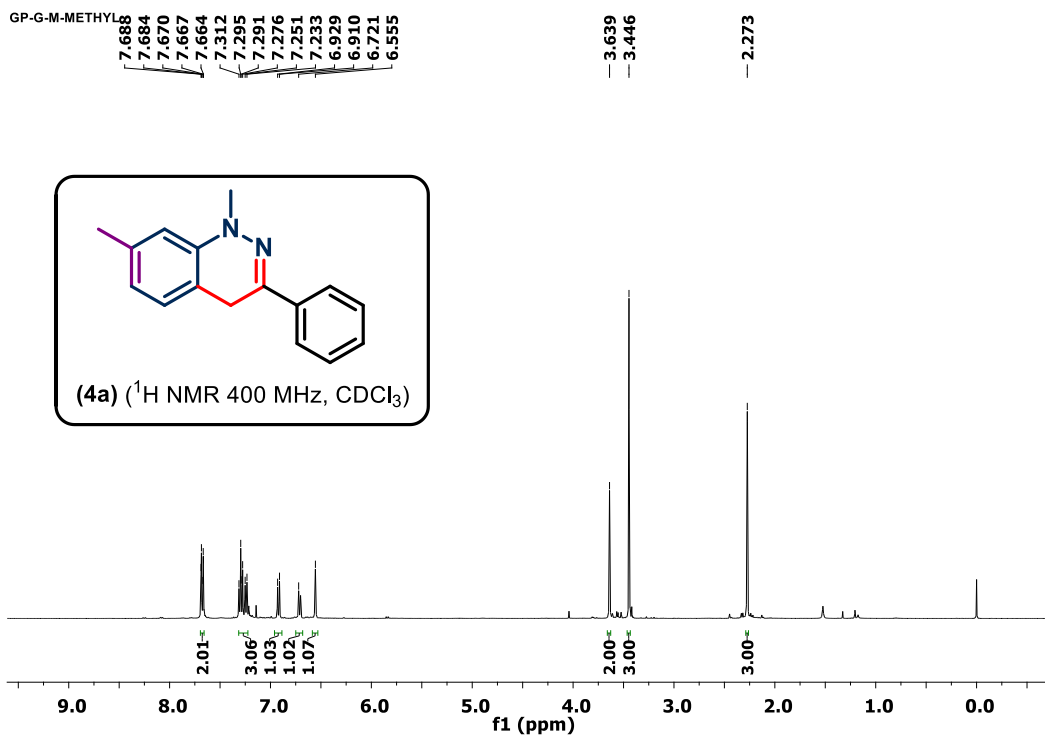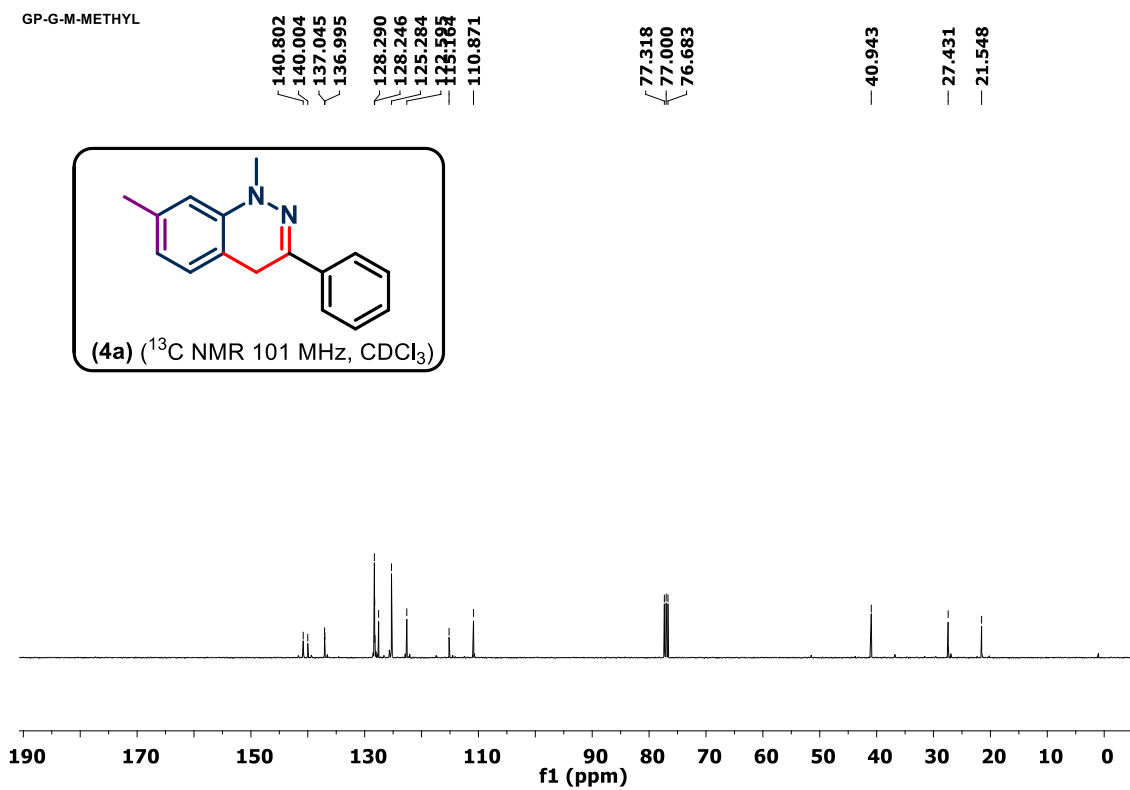

GP-PM-397A

7.777  
7.773  
7.768  
7.755  
7.410  
7.408  
7.390  
7.386  
7.371  
7.345  
7.342  
7.339  
7.324  
7.260  
6.795  
6.789  
6.784  
6.762  
6.735  
6.730

3.794  
3.762  
3.527

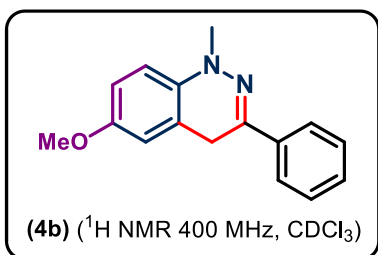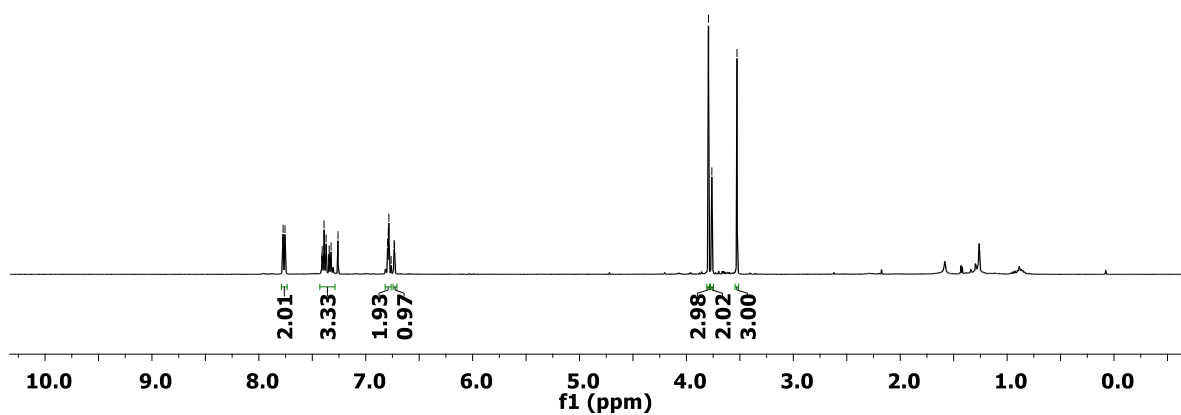

GP-PM-397A

155.217  
138.648  
137.017  
135.377  
128.322  
128.155  
125.206  
119.667  
113.256  
112.548  
111.182

77.318  
77.000  
76.683

55.669

41.264

28.119

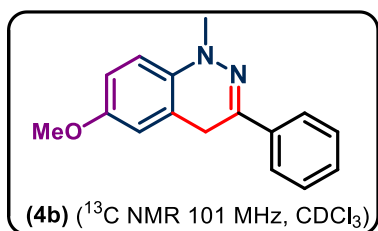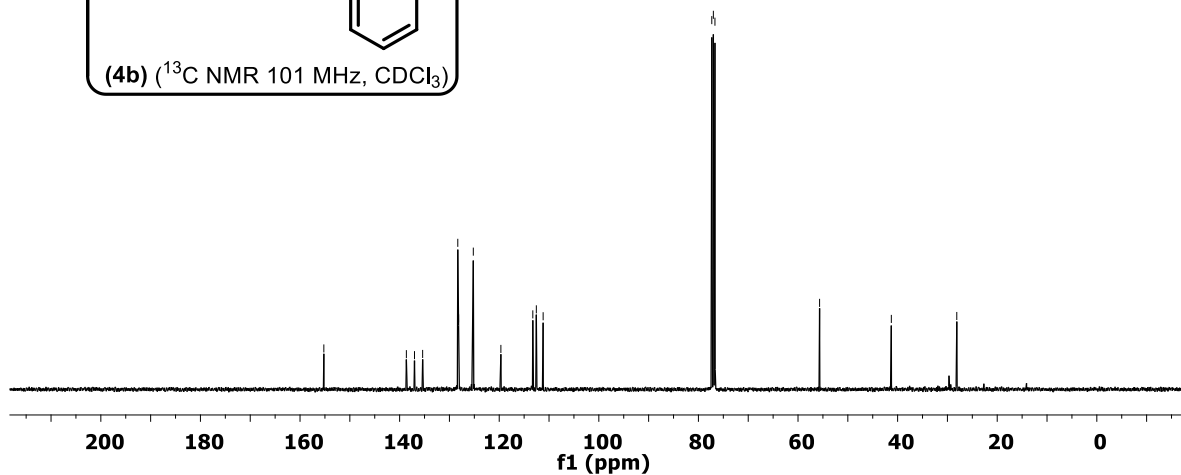

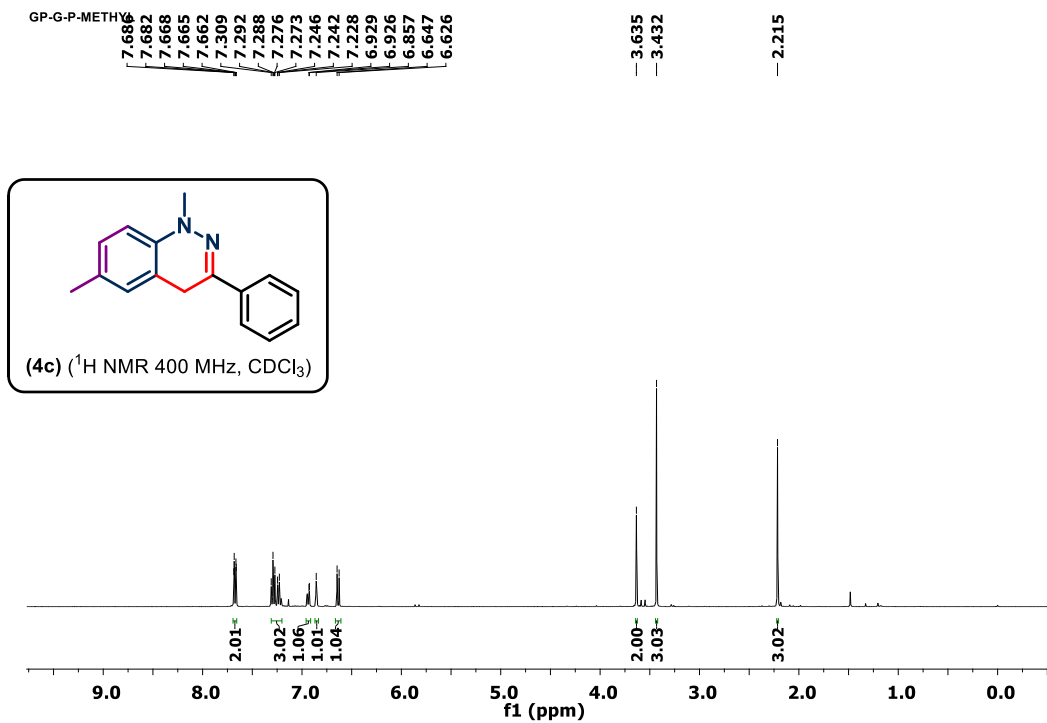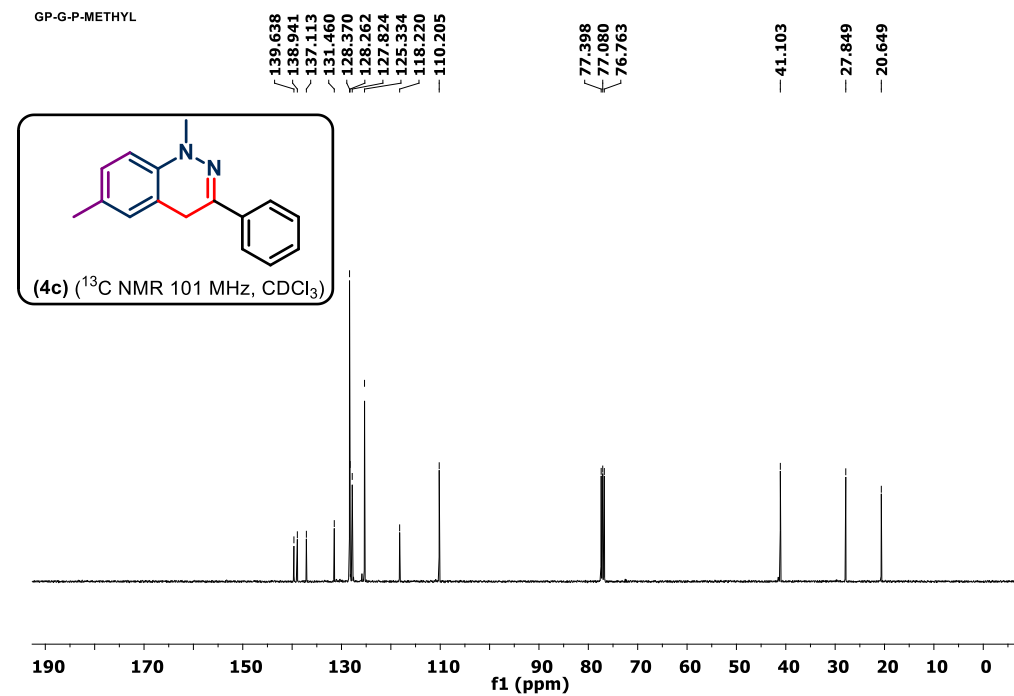

GP-PM-358

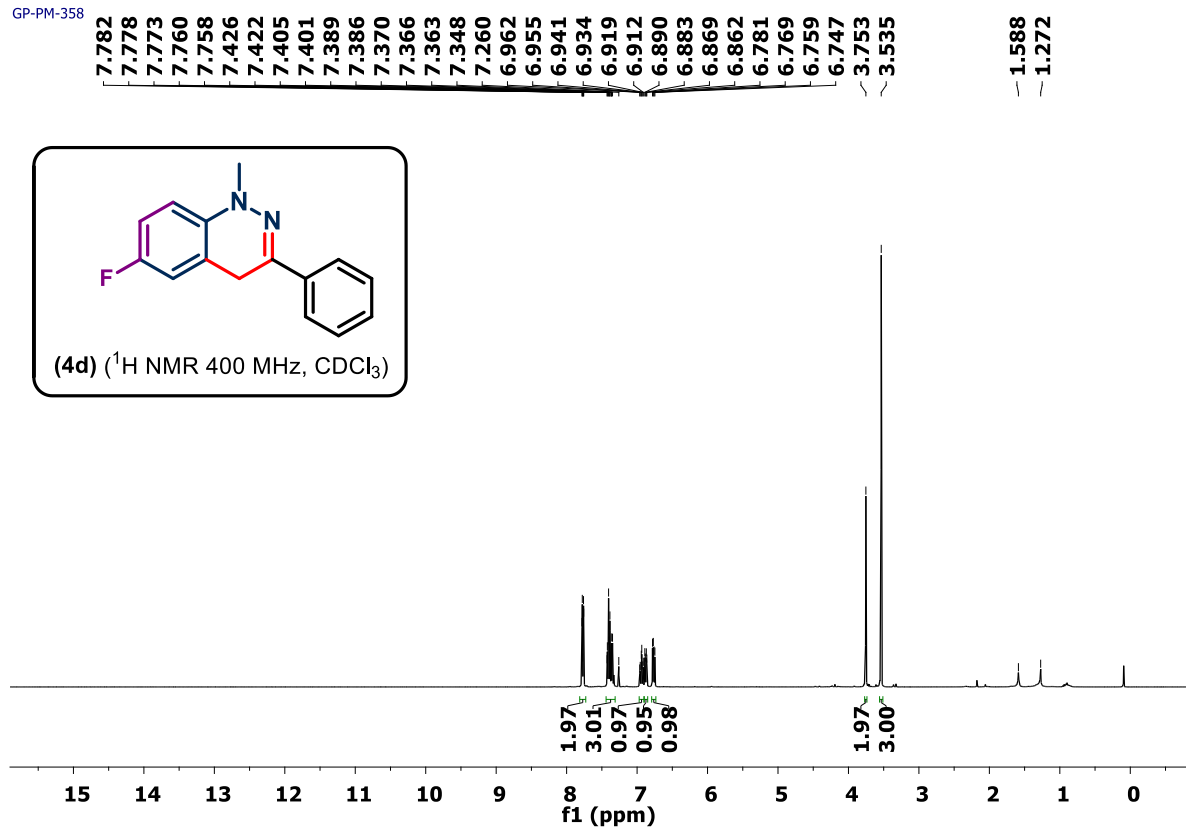

GP-PM-358

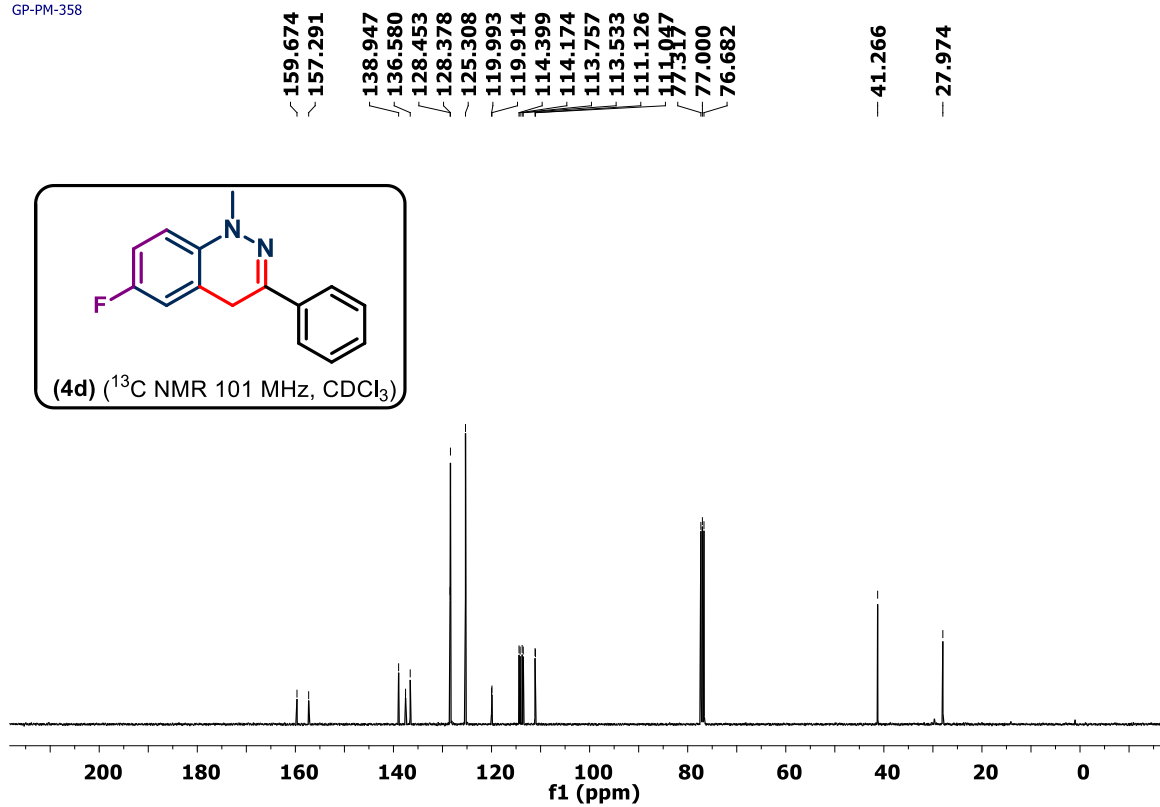

GP-PM-387A

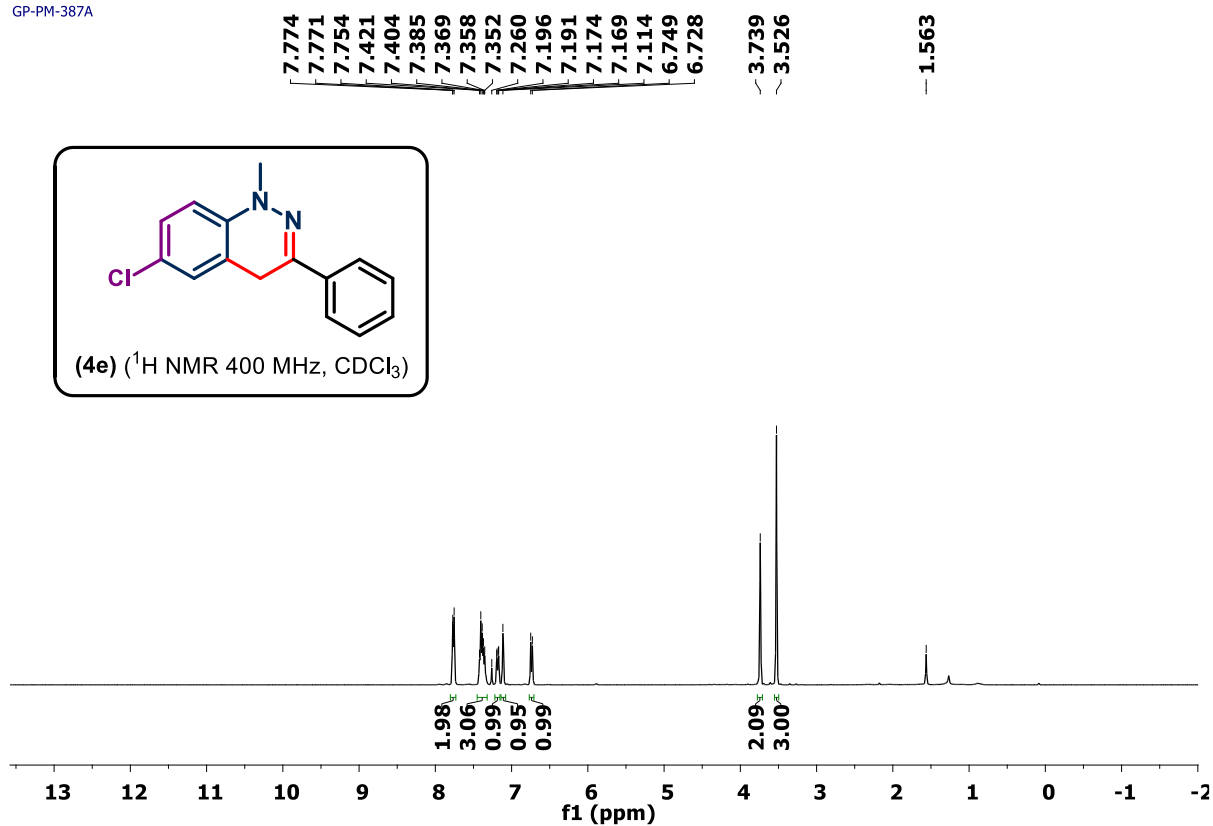

GP-PM-387A

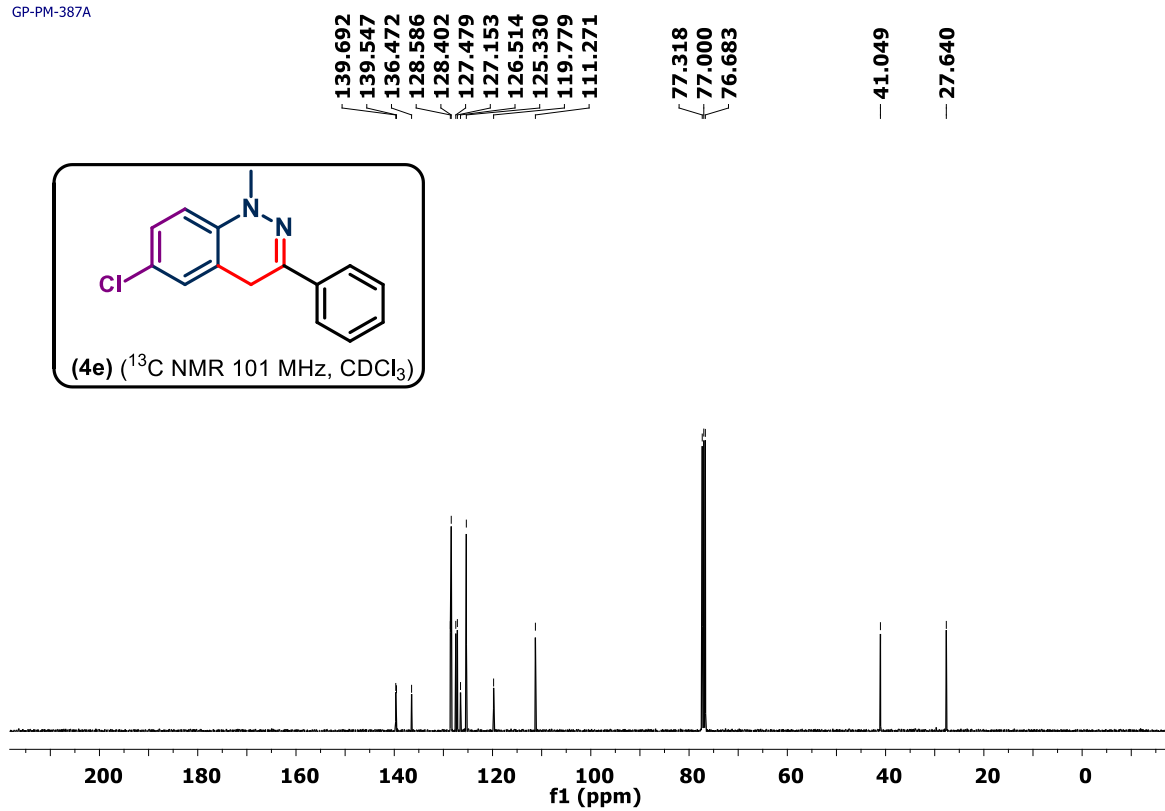

gp-pm-391A

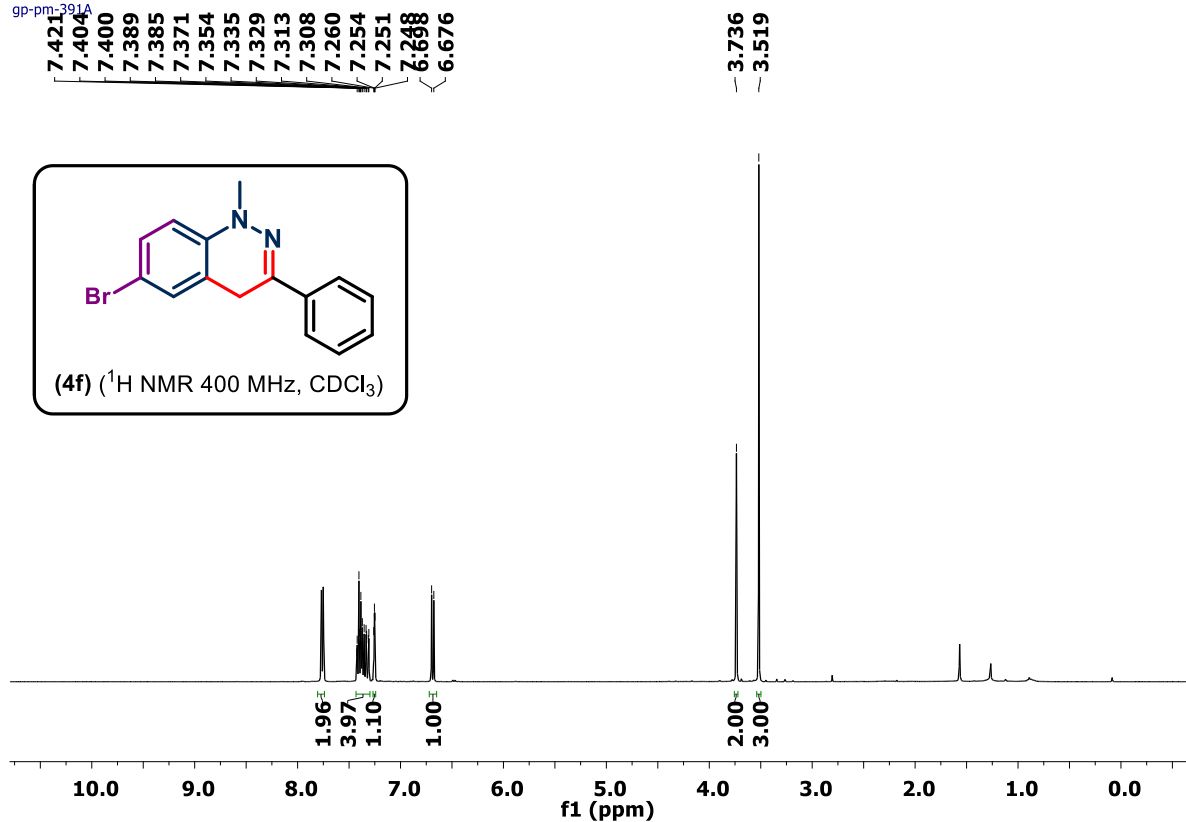

gp-pm-391A

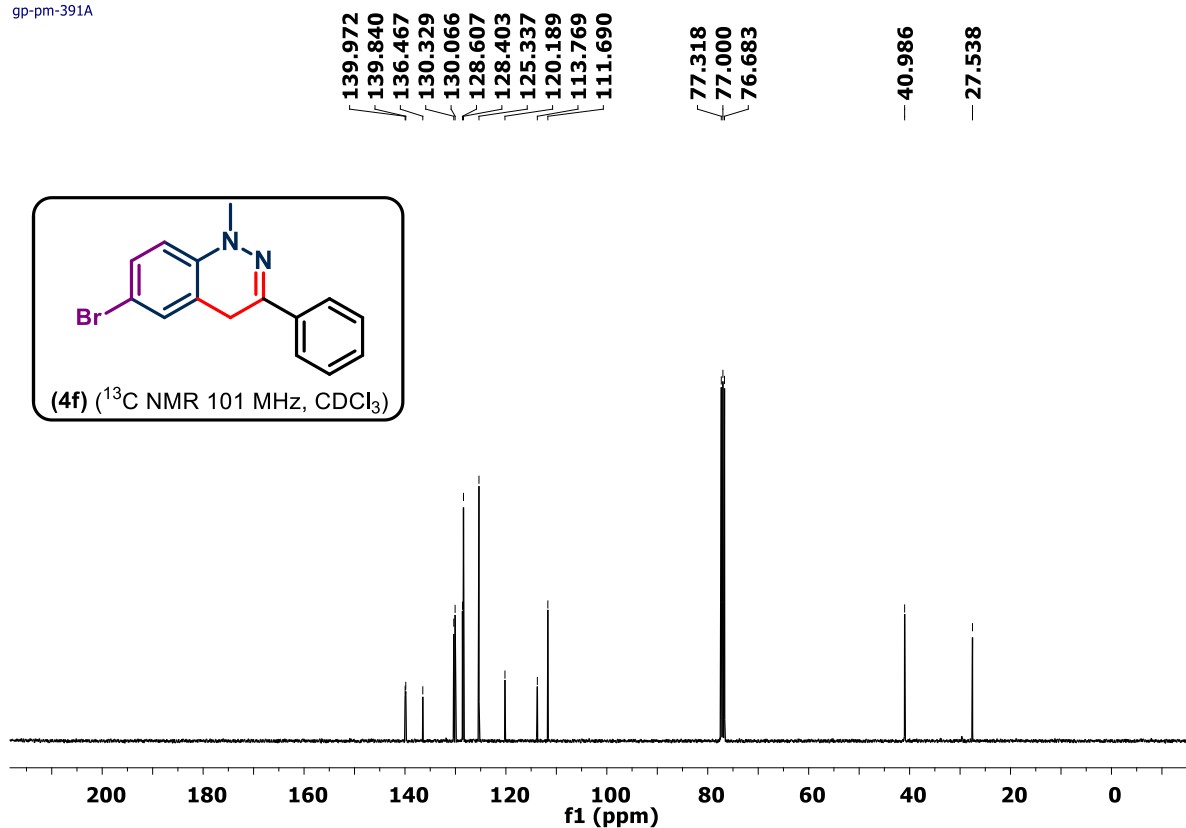



GP-G-M-BROMO

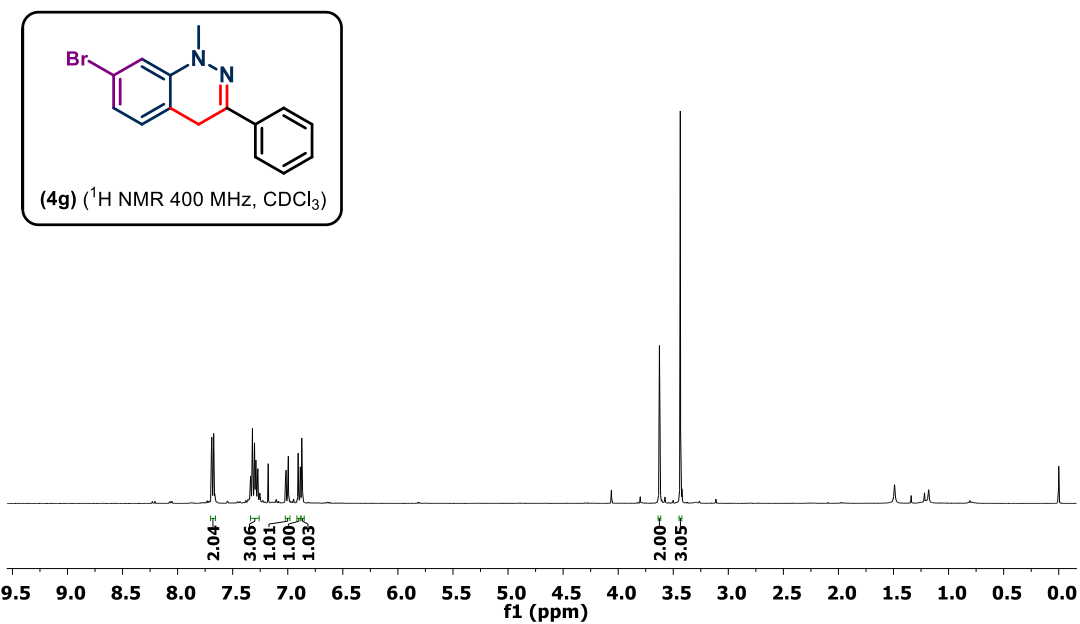

GP-G-M-BROMO

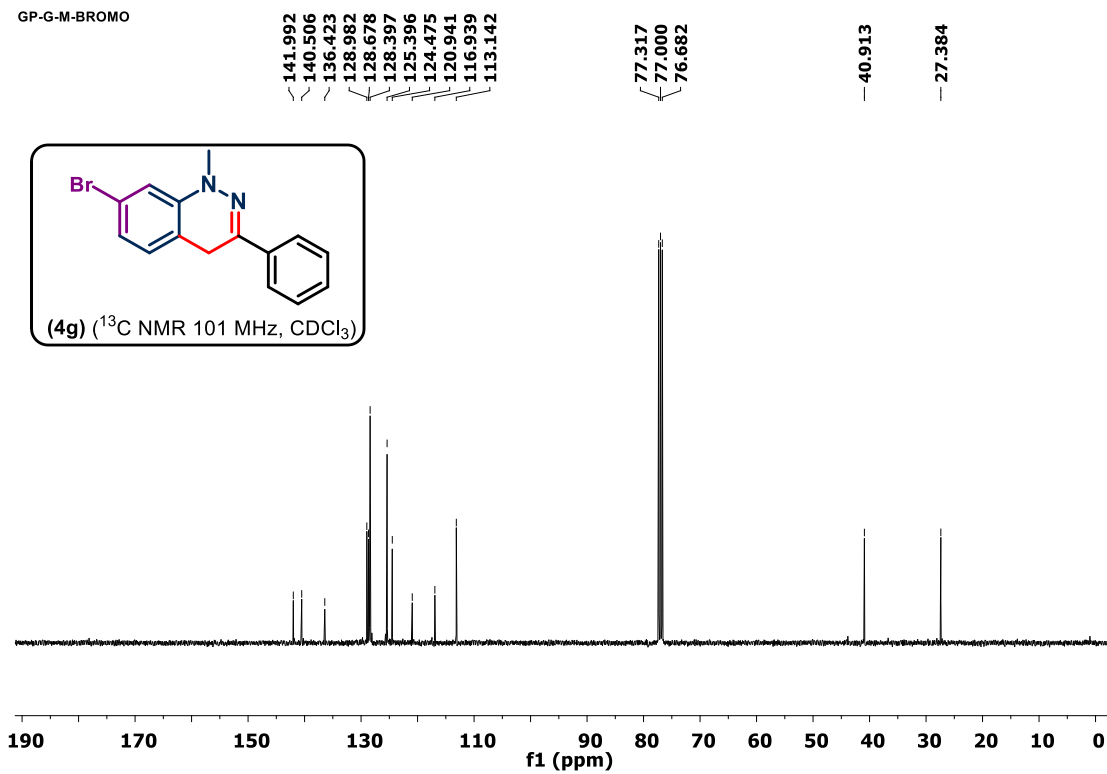

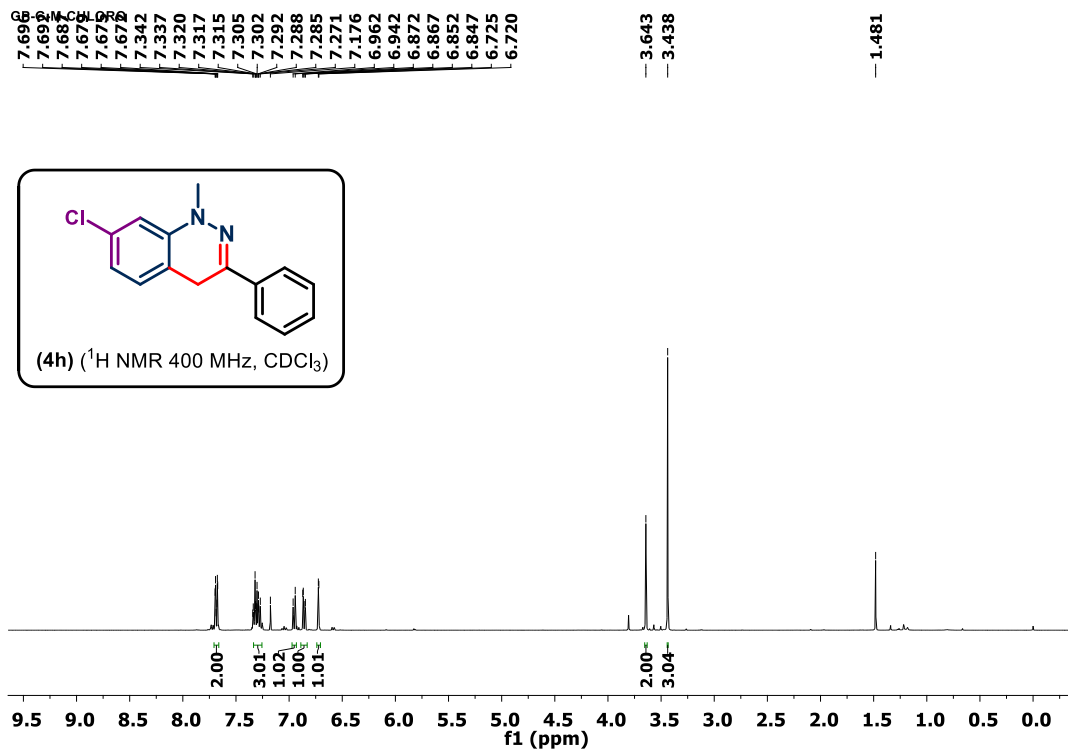

GP-G-M-CHLORO

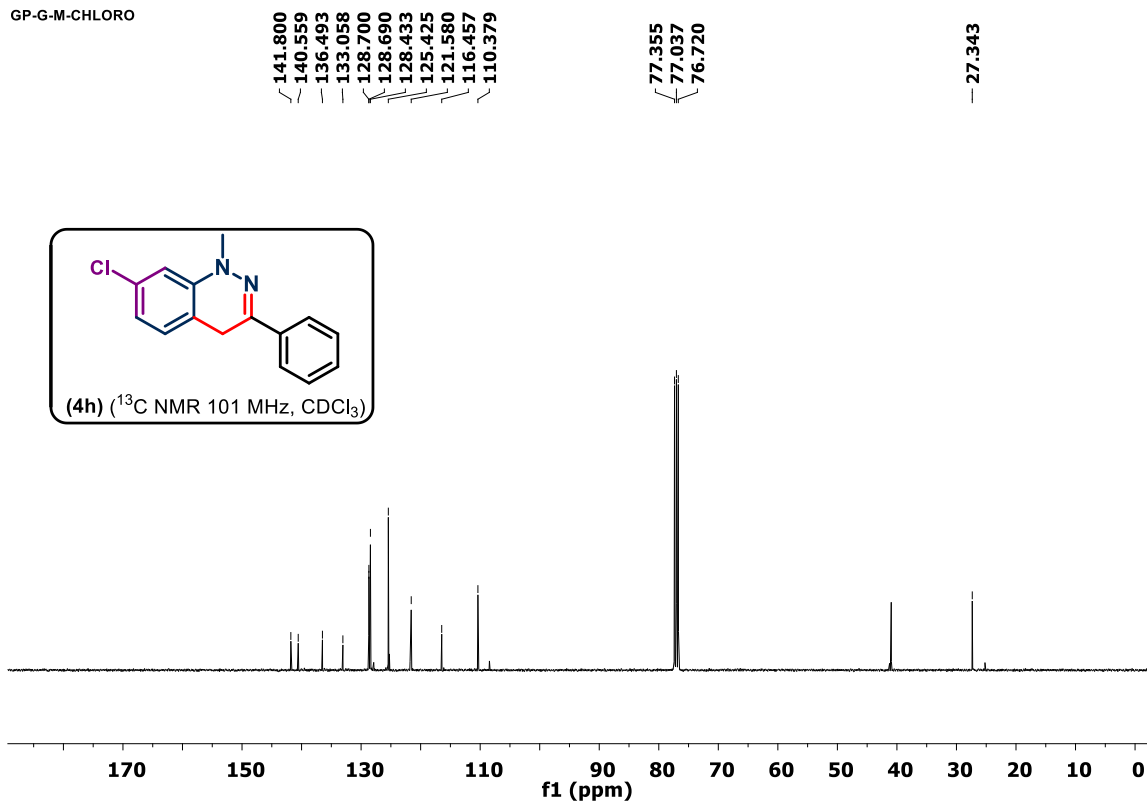

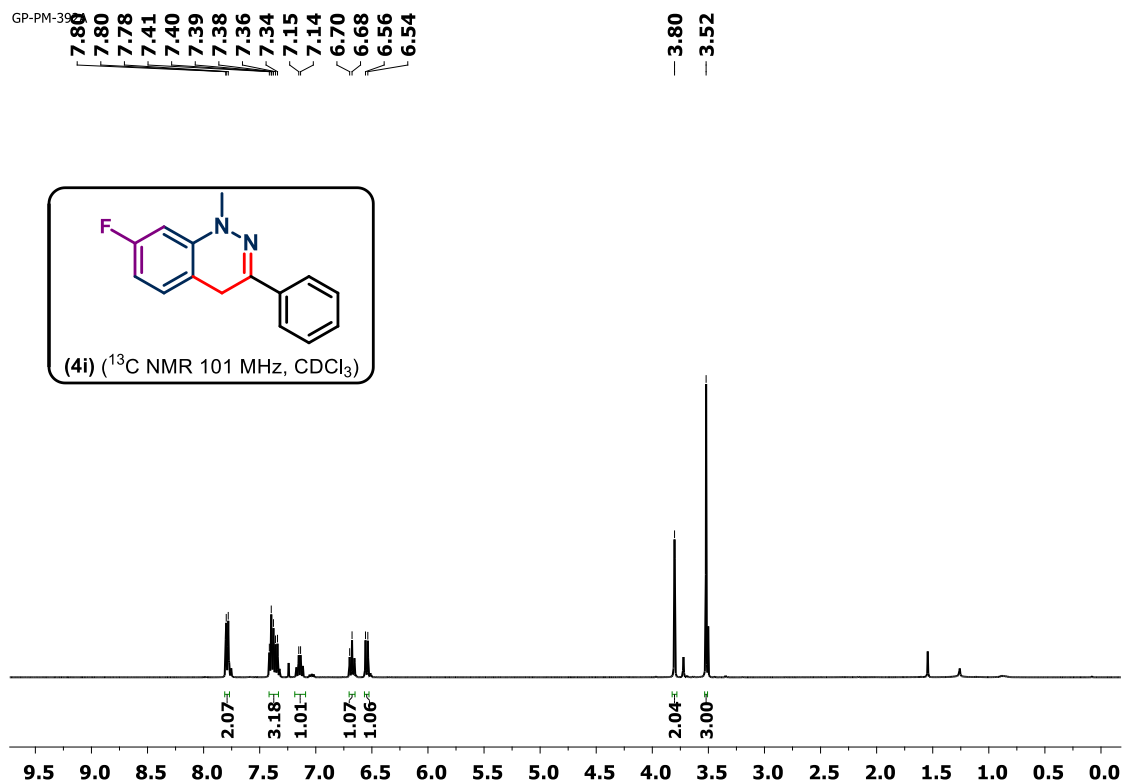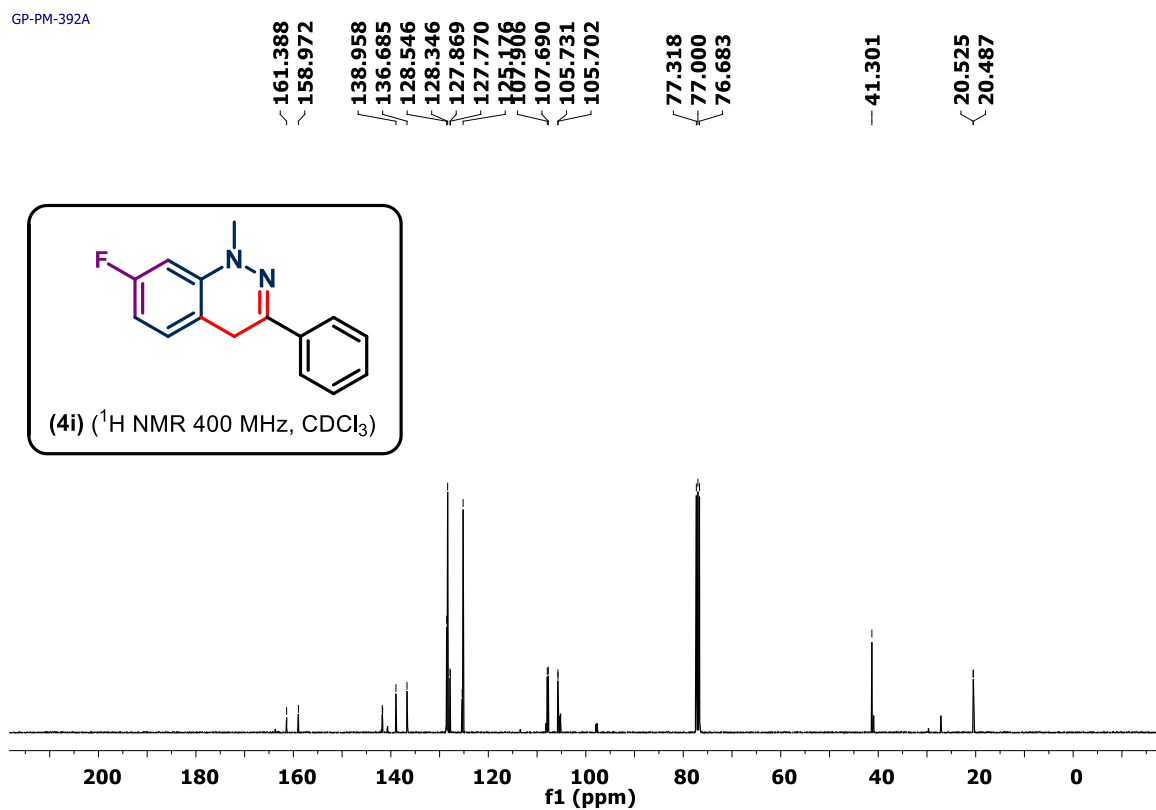

GP-PM-392A

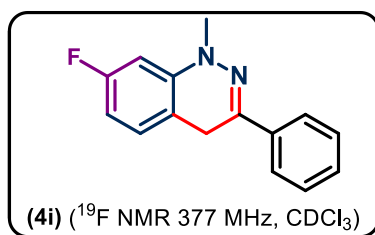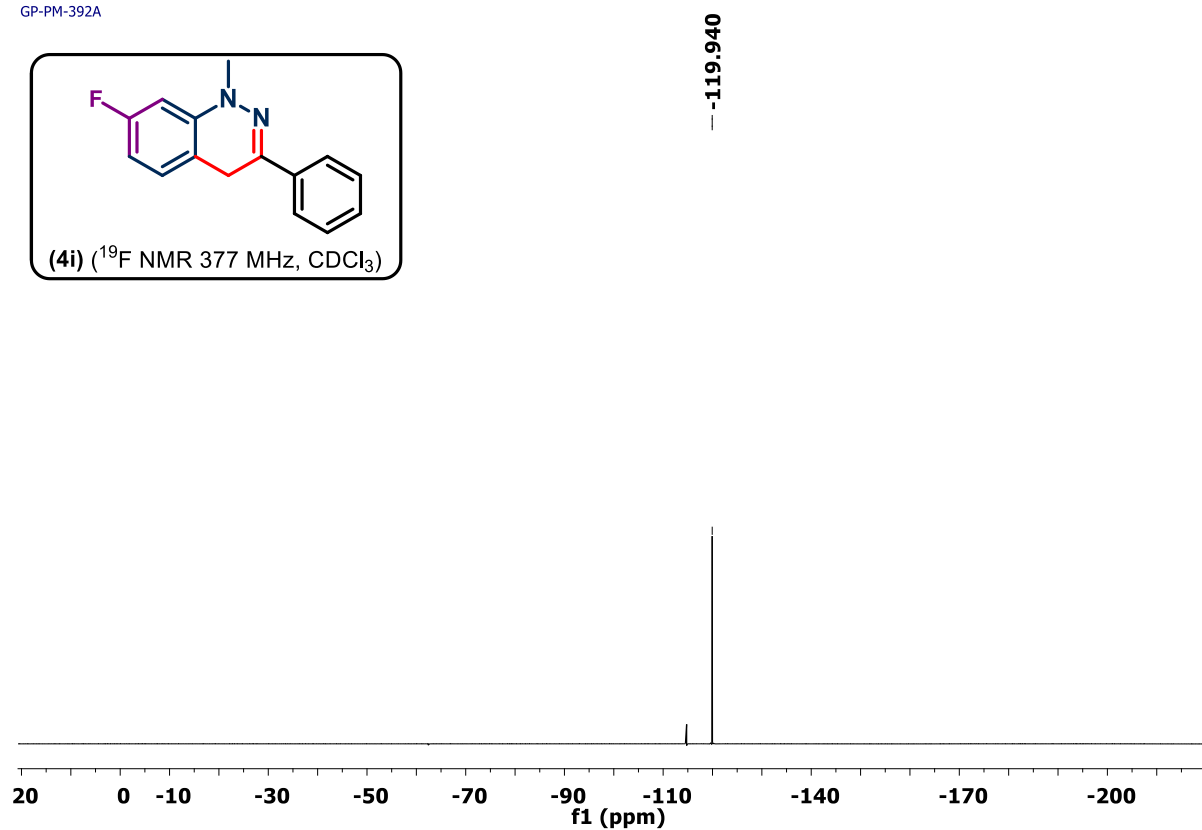

GP-PM-371A

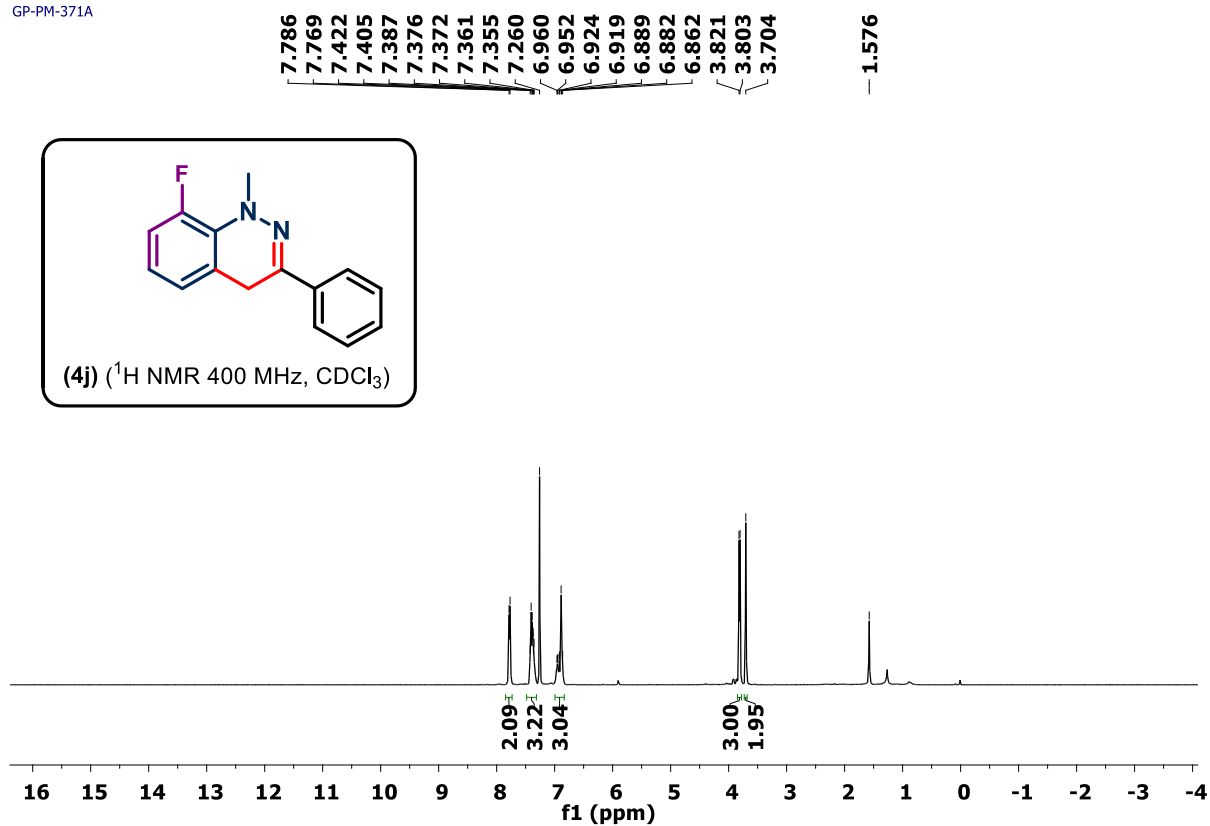

GP-PM-371A

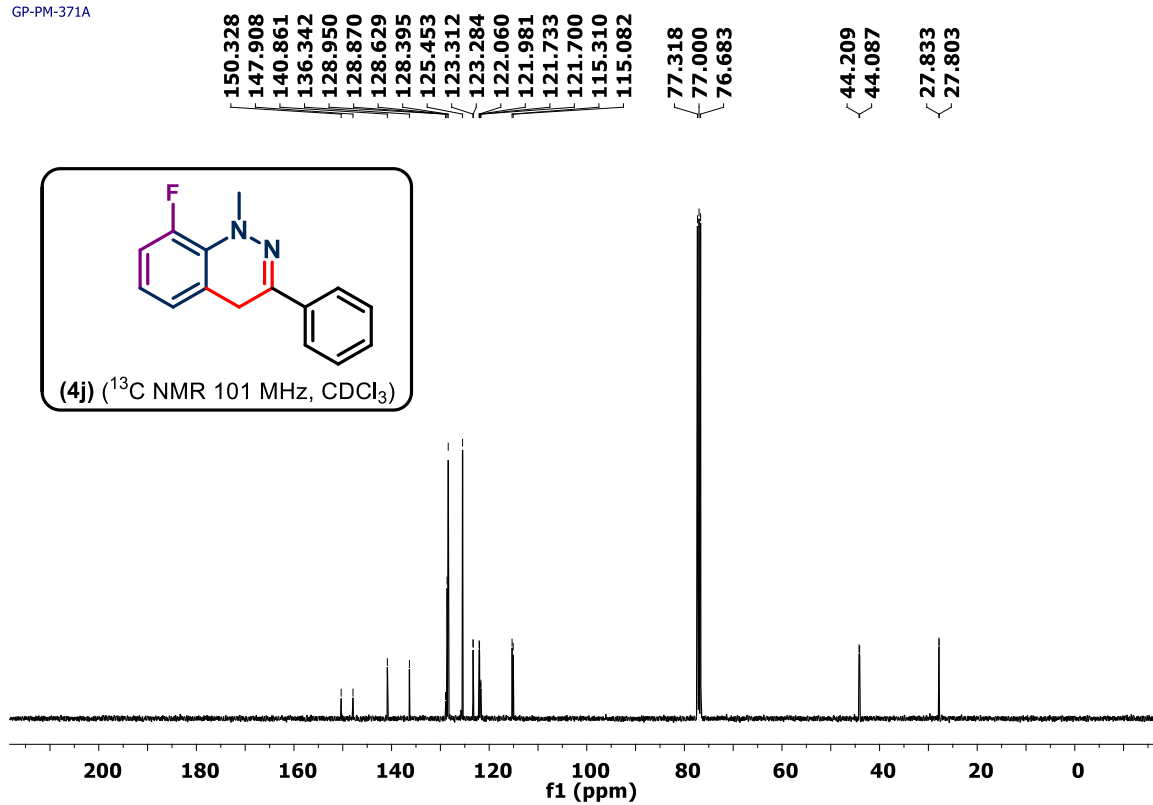

GP-G-528

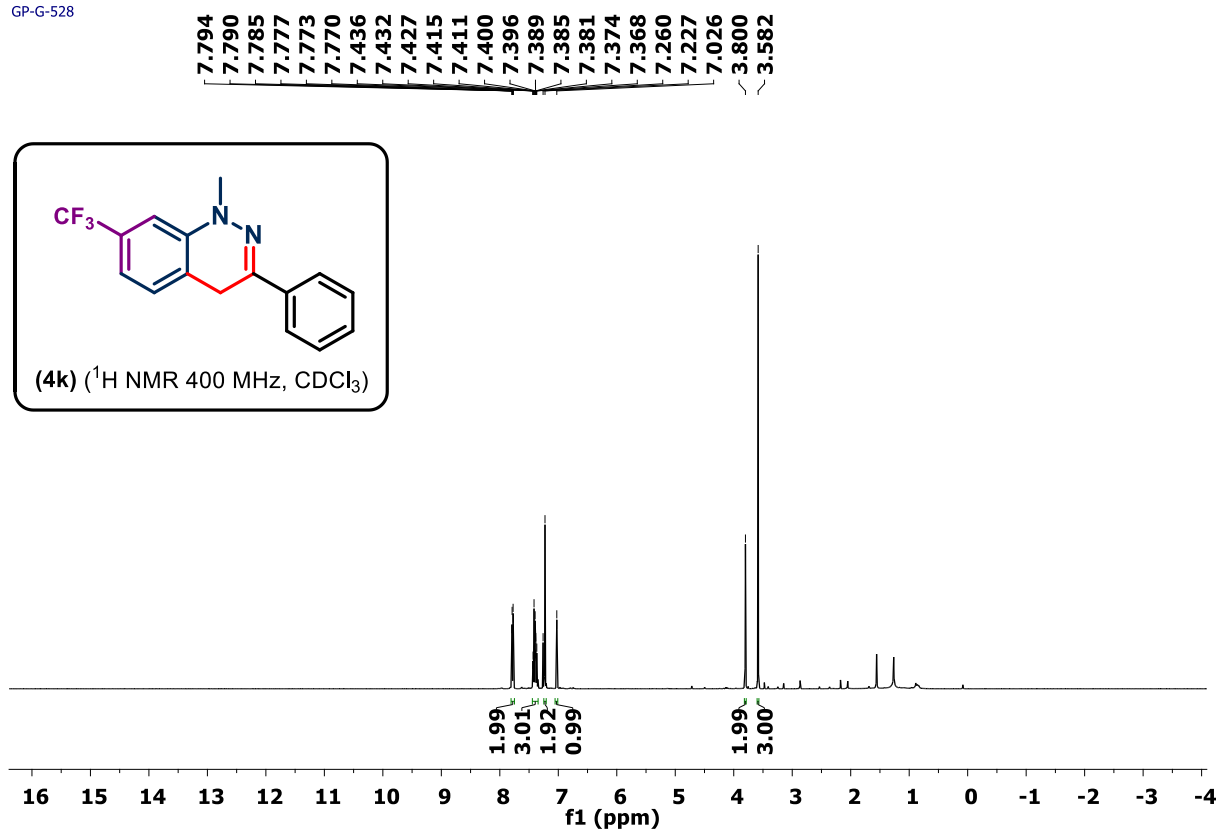

GP-G-528

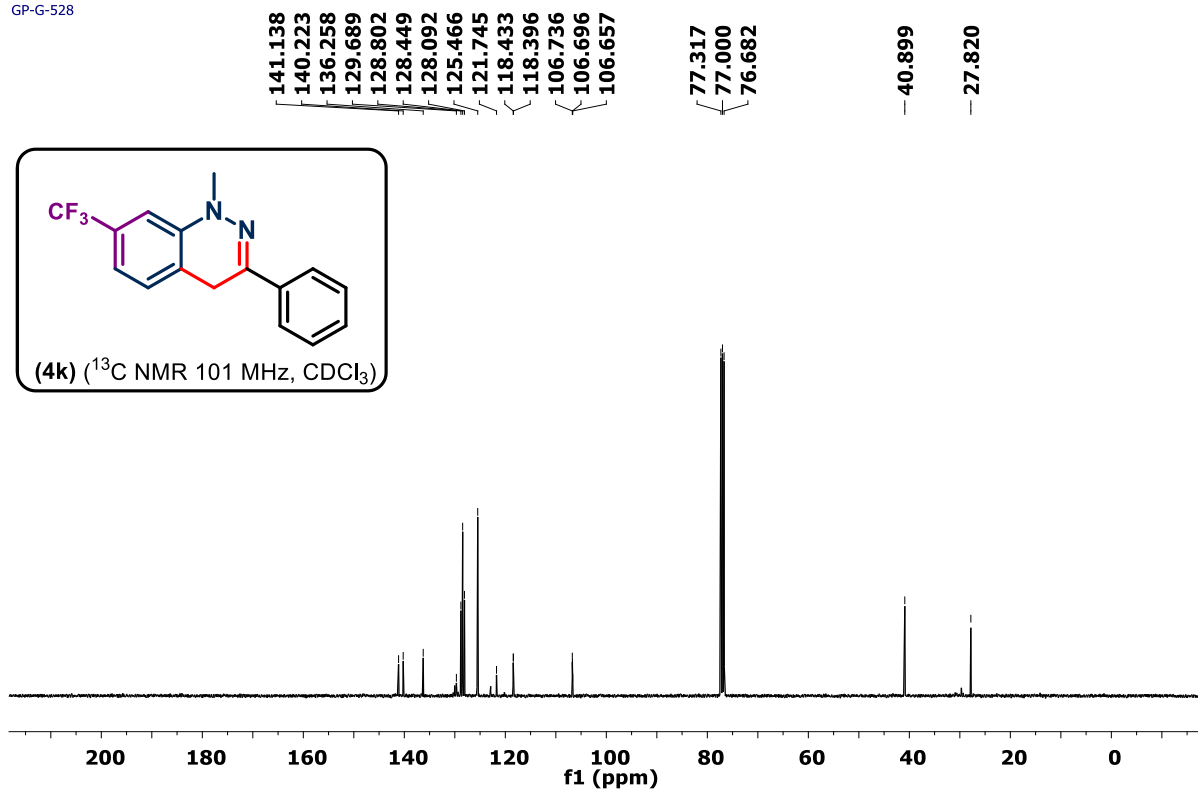

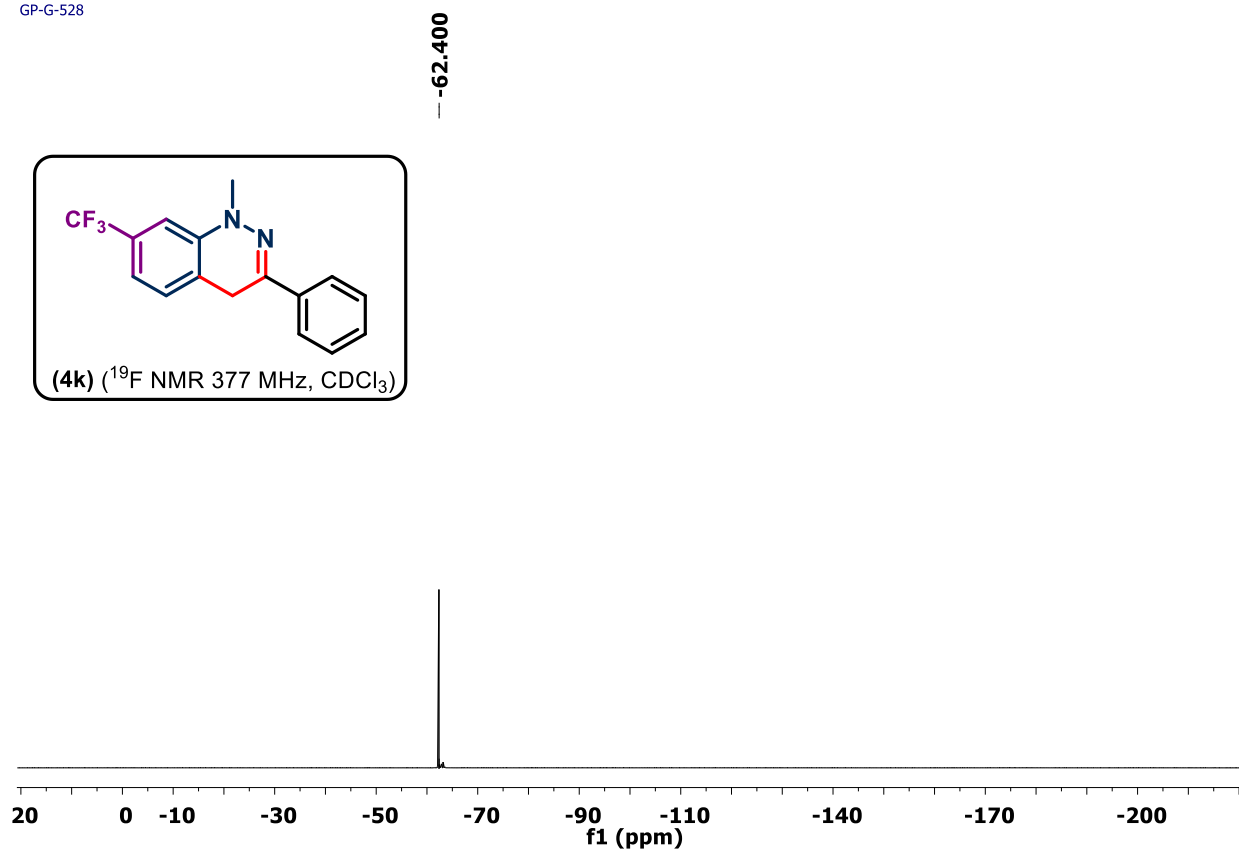

GP-PM-393A

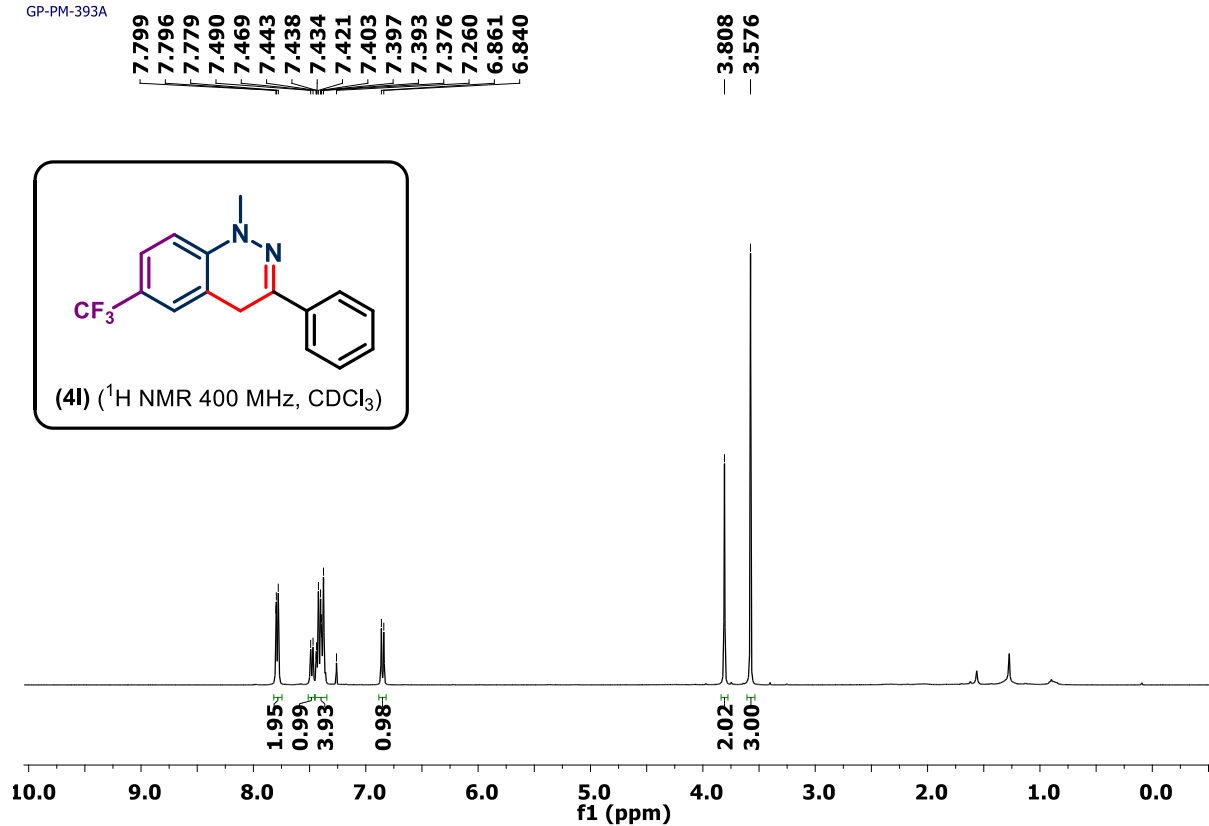

GP-PM-393A

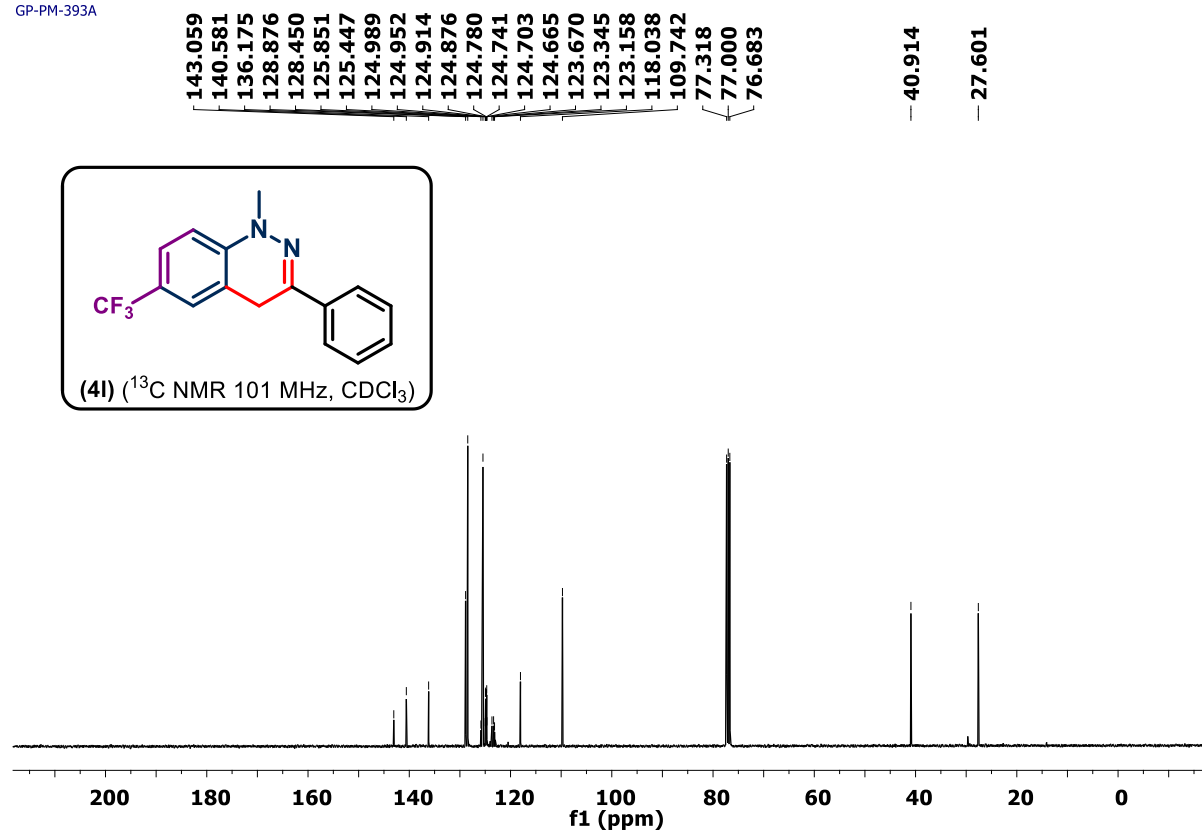



GP-PM-393A

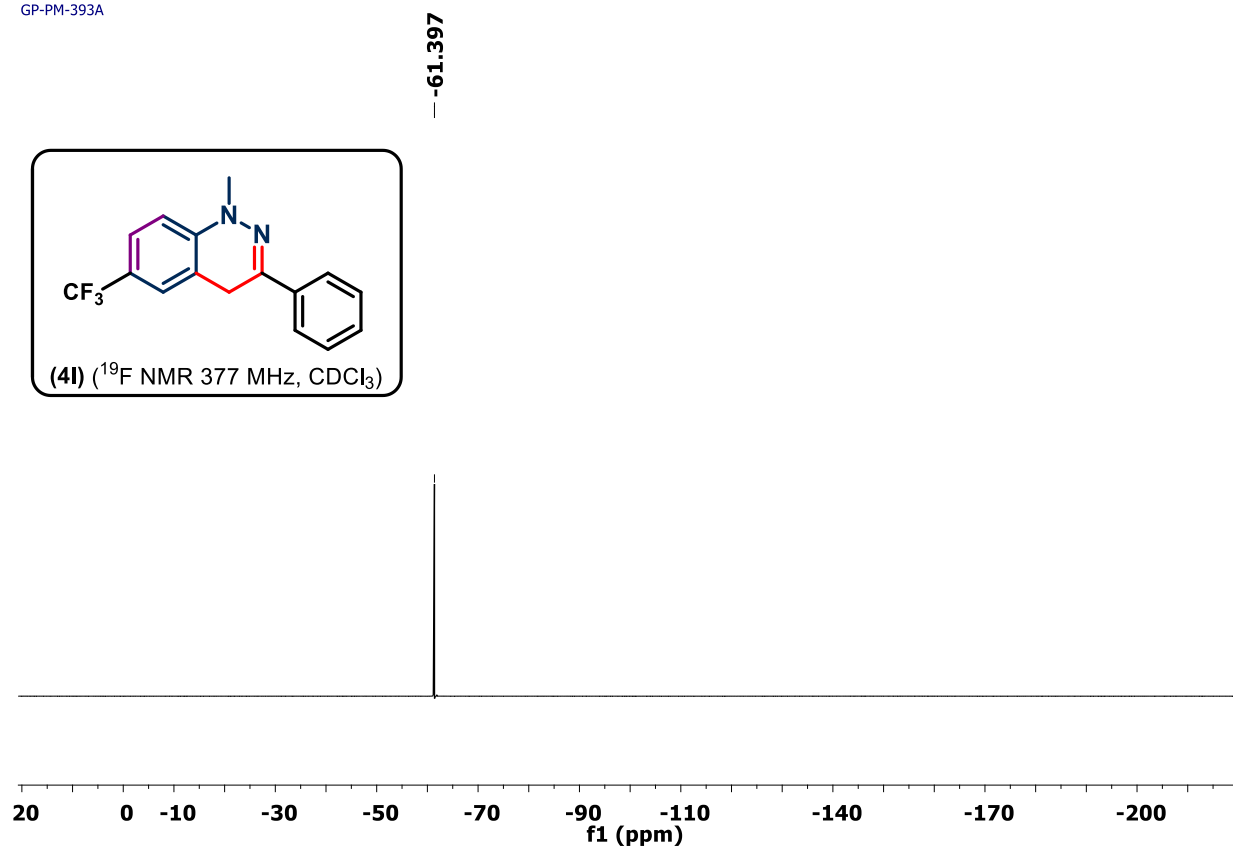

GP-PM-399A

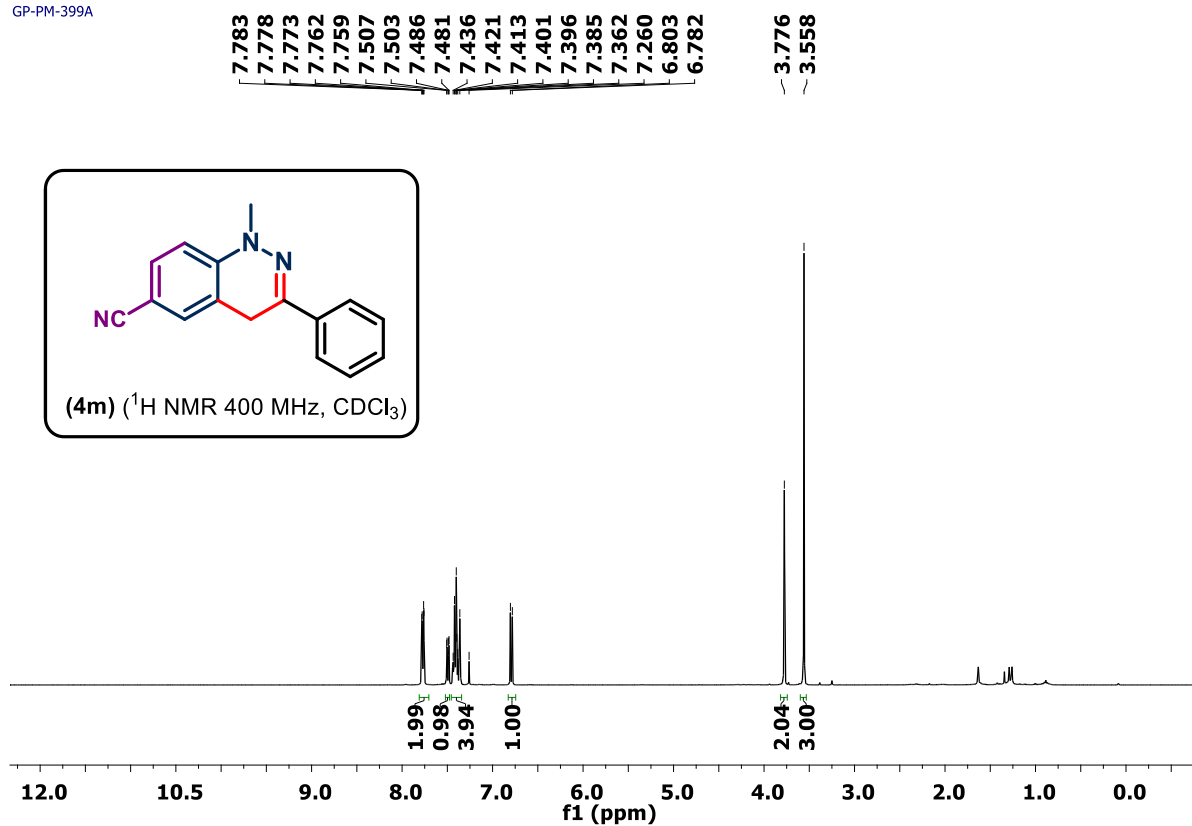

GP-PM-399A

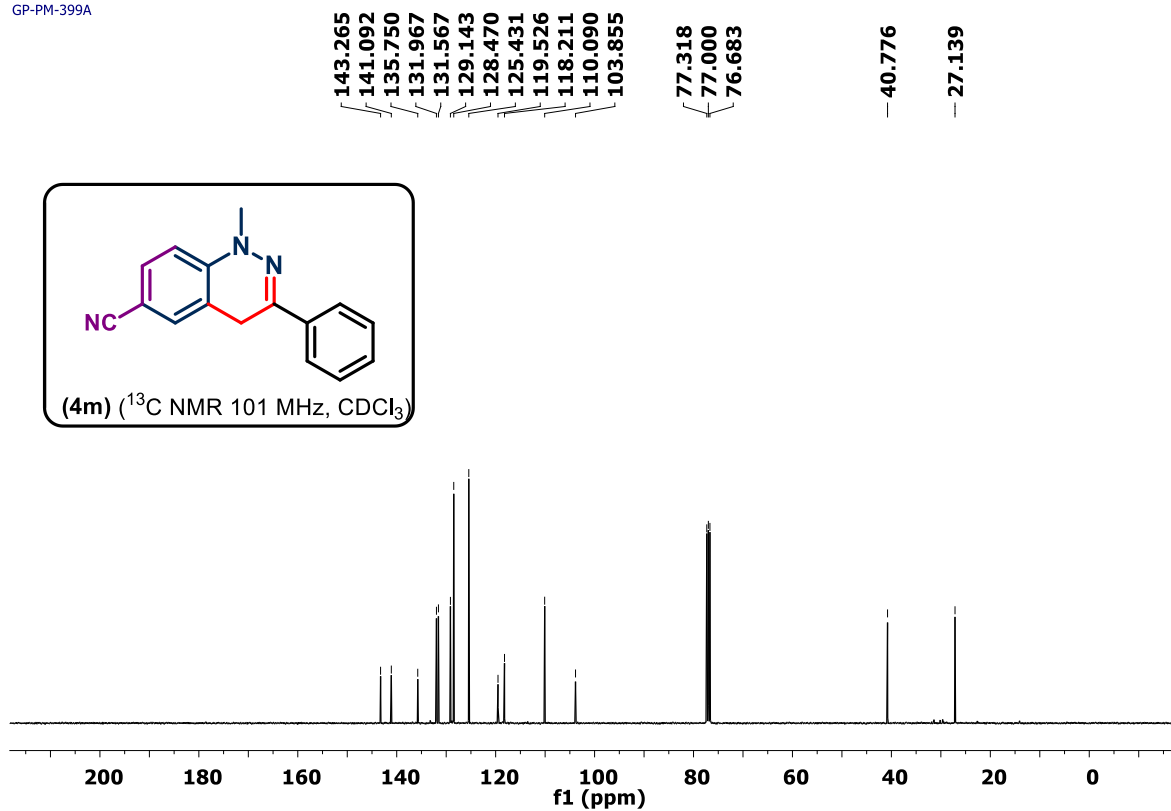

7.74  
7.73  
7.72  
7.71  
7.70  
7.69  
7.68  
7.67  
7.66  
7.65  
7.64  
7.63  
7.62  
7.61  
7.60  
7.59  
7.58  
7.57  
7.56  
7.55  
7.54  
7.53  
7.52  
7.51  
7.50  
7.49  
7.48  
7.47  
7.46  
7.45  
7.44  
7.43  
7.42  
7.41  
7.40  
7.39  
7.38  
7.37  
7.36  
7.35  
7.34  
7.33  
7.32  
7.31  
7.30  
7.29  
7.28  
7.27  
7.26  
7.25  
7.24  
7.23  
7.22  
7.21  
7.20  
7.19  
7.18  
7.17  
7.16  
7.15  
7.14  
7.13  
7.12  
7.11  
7.10  
7.09  
7.08  
7.07  
7.06  
7.05  
7.04  
7.03  
7.02  
7.01  
7.00  
6.99  
6.98  
6.97  
6.96  
6.95  
6.94  
6.93  
6.92  
6.91  
6.90  
6.89  
6.88  
6.87  
6.86  
6.85  
6.84  
6.83  
6.82  
6.81  
6.80  
6.79

3.90  
3.88  
3.71

1.50  
1.50  
1.36  
1.35  
1.33

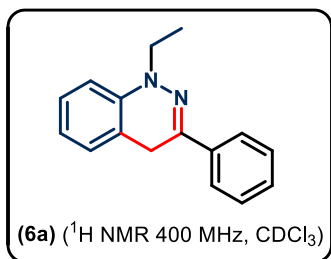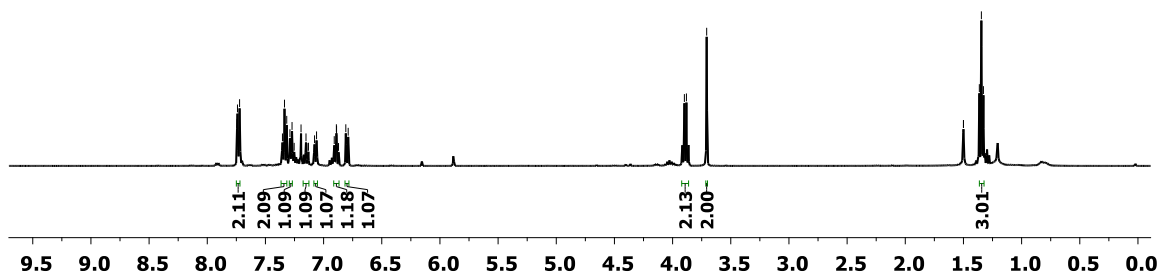

GP-G-551

139.652  
139.371  
137.187  
128.396  
128.319  
128.282  
127.317  
125.373  
121.602  
118.293  
110.463

77.425  
77.107  
76.790

47.044

27.823

12.461

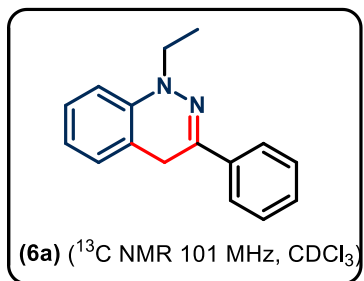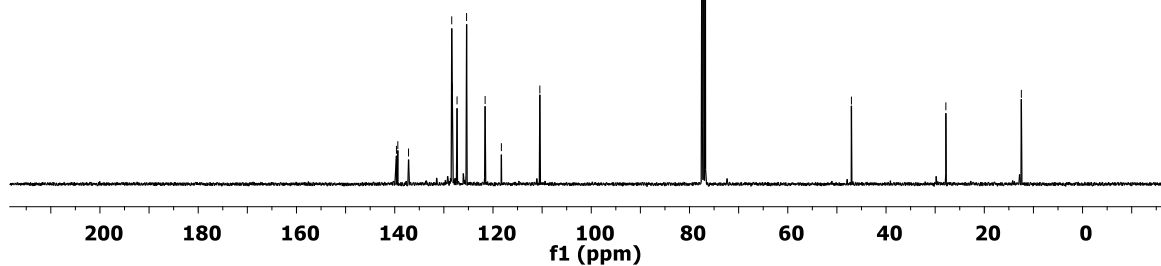

GP-G-554

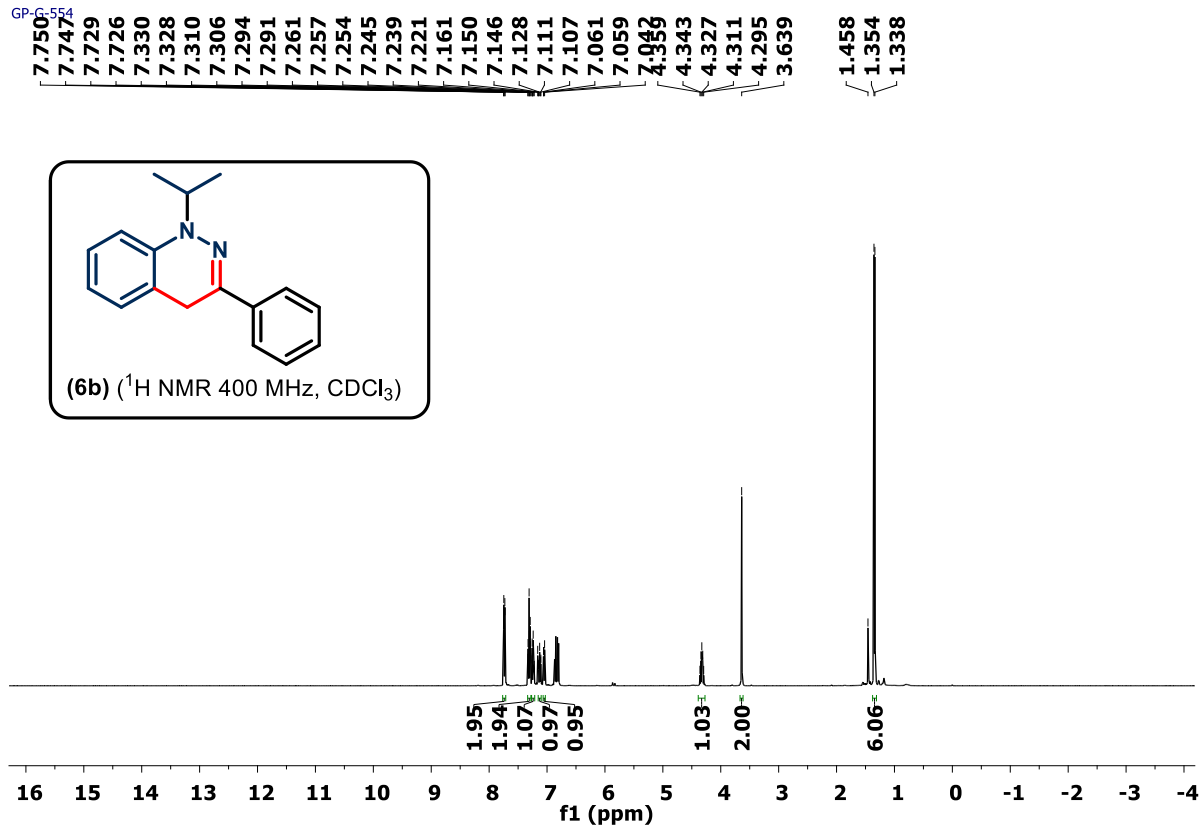

GP-G-554

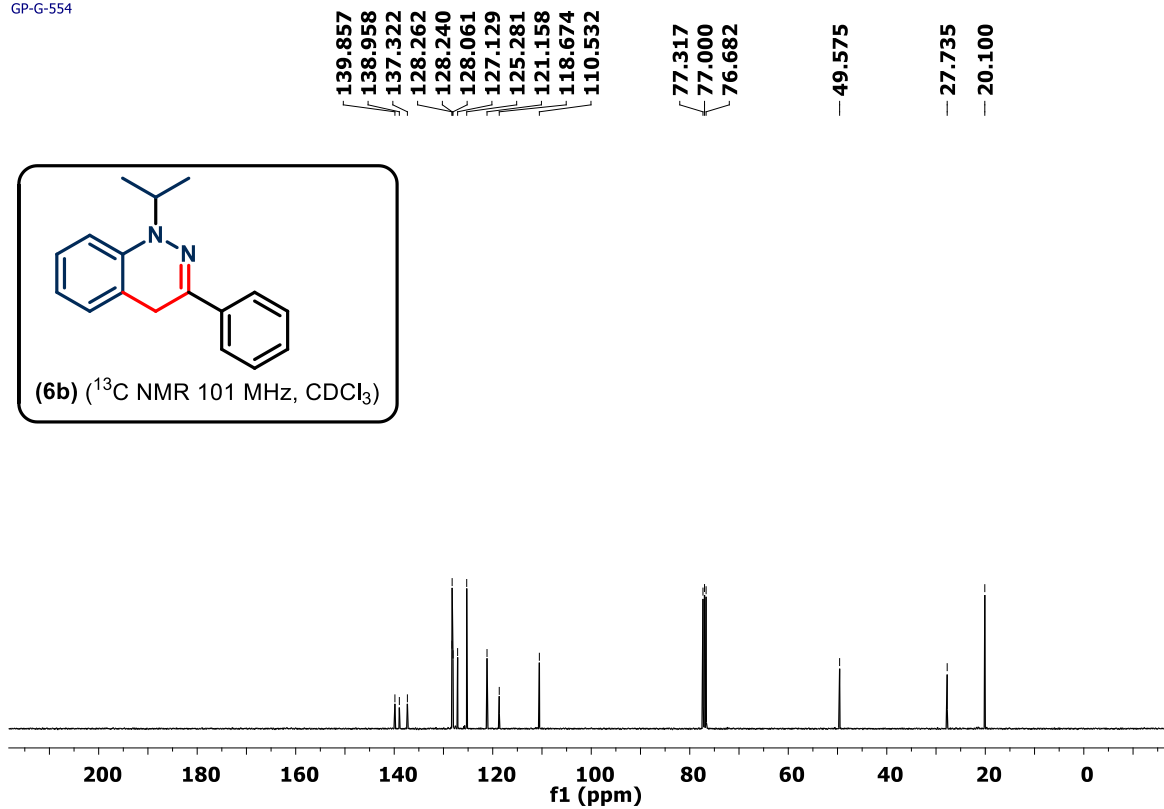

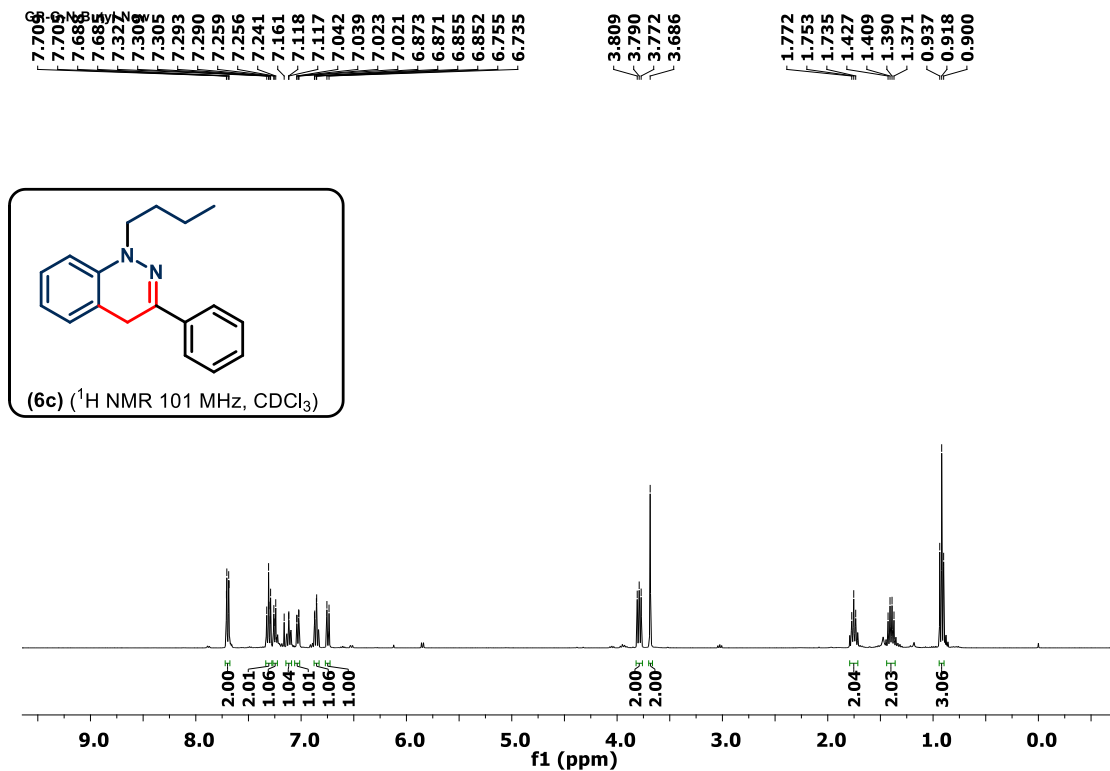

GP-G-N-Butyl-New

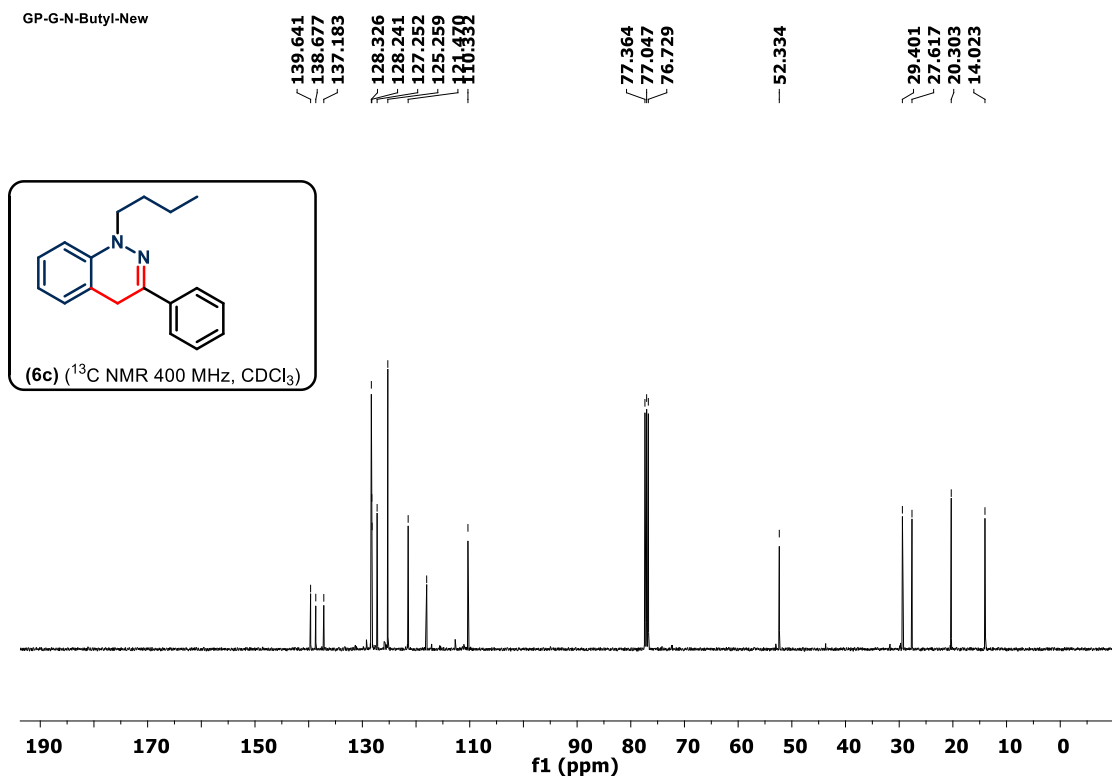

GP-G-N-Benzyl

7.736, 7.734, 7.732, 7.728, 7.718, 7.715, 7.713, 7.738, 7.321, 7.317, 7.302, 7.278, 7.260, 7.252, 7.234, 7.230, 7.214, 7.168, 7.156, 7.032, 7.030, 6.832, 6.829, 6.613, 6.611, 5.982, 3.793

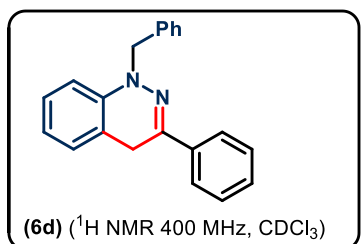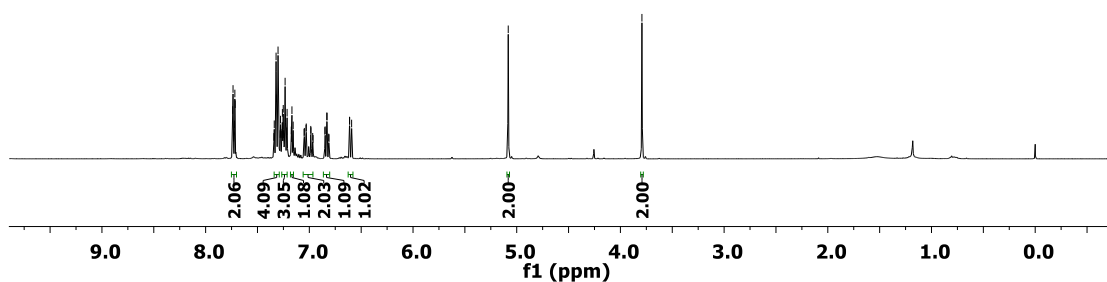

GP-G-N-Benzyl

139.316, 139.084, 138.246, 136.997, 128.552, 128.365, 128.176, 127.309, 127.004, 126.980, 125.294, 121.852, 117.712, 111.137, 77.363, 77.045, 76.728, 57.191, 27.455

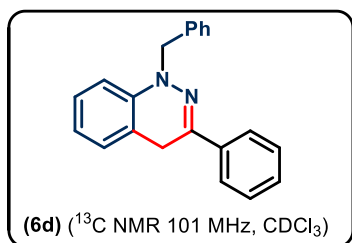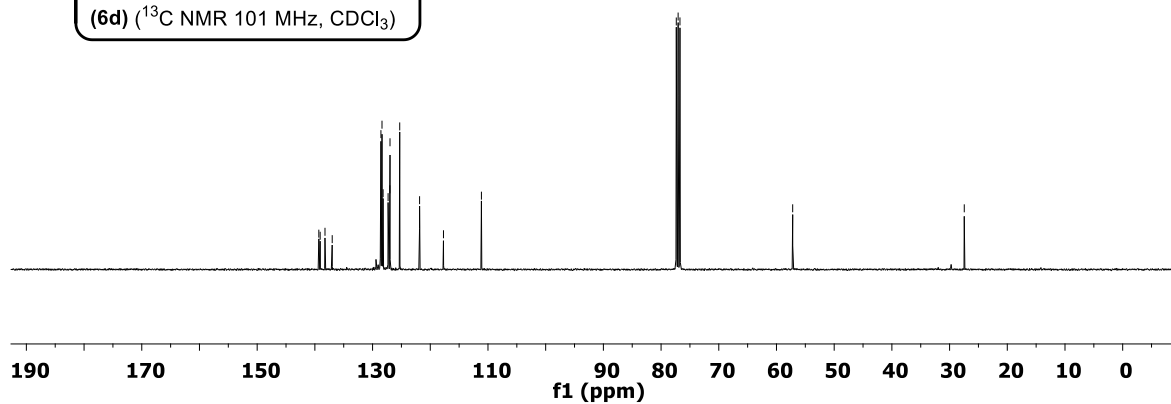

GP-G-DR  
7.82  
7.80  
7.57  
7.55  
7.43  
7.41  
7.39  
7.37  
7.35  
7.33  
7.32  
7.30  
7.19  
7.19  
7.15  
7.13  
7.03  
7.03  
7.01  
6.99  
6.98  
6.97  
6.97  
6.85  
6.83

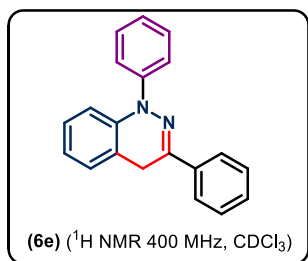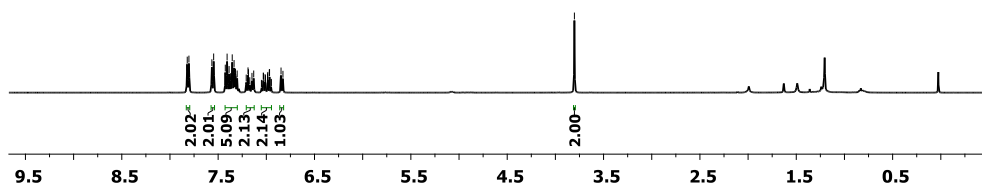

GP-G-DR-A

143.338  
141.115  
139.244  
135.543  
128.119  
127.763  
127.360  
126.971  
125.865  
124.826  
124.220  
123.354  
122.052  
117.919  
111.397  
76.317  
76.000  
75.682

— 27.373

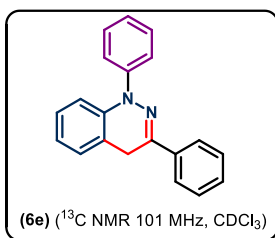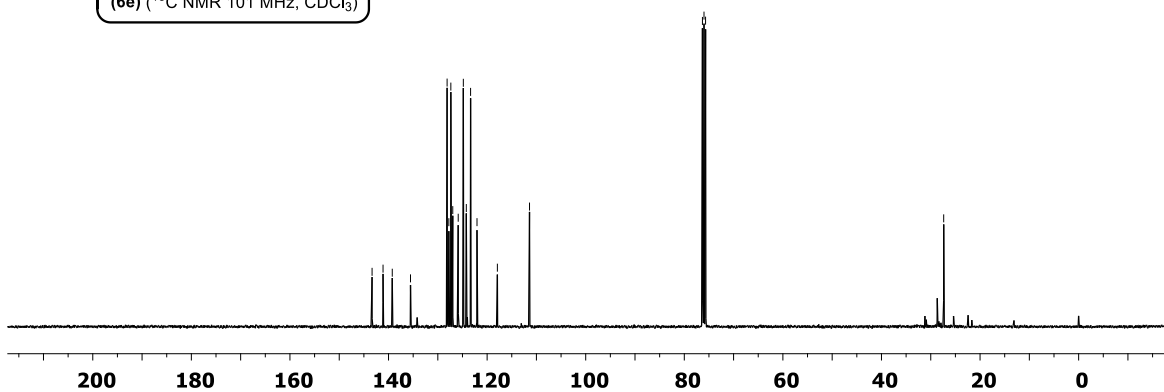

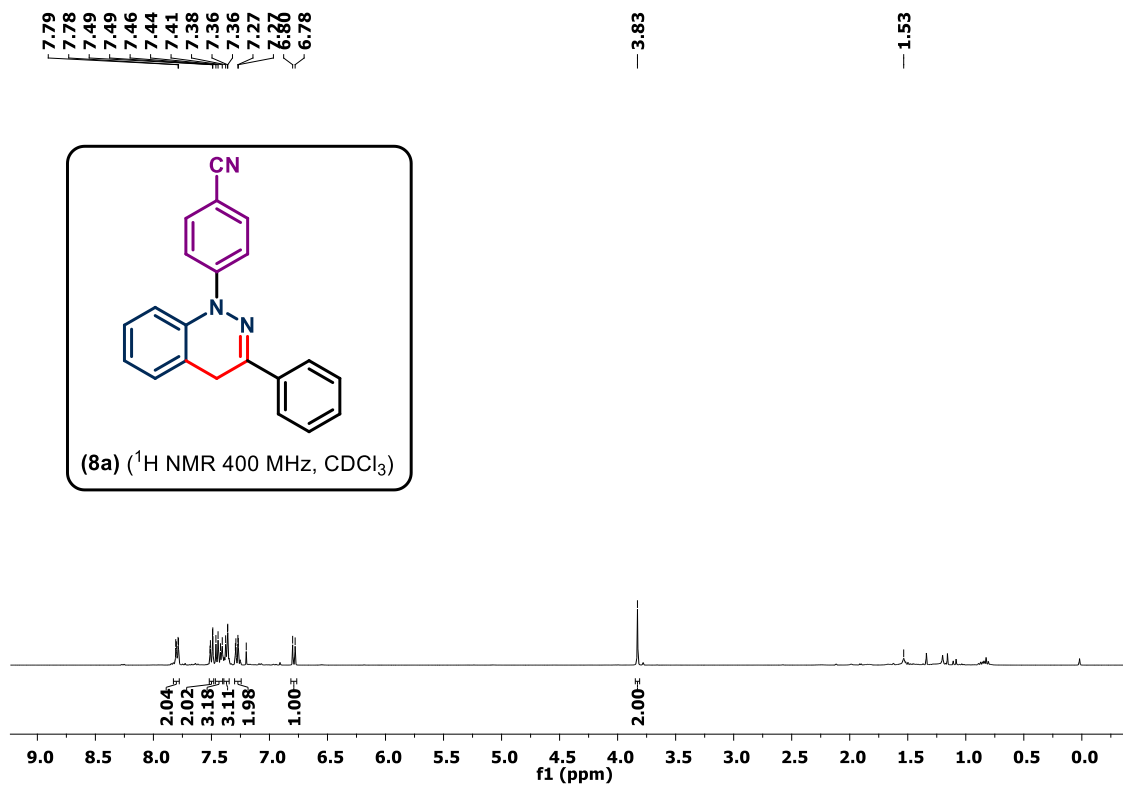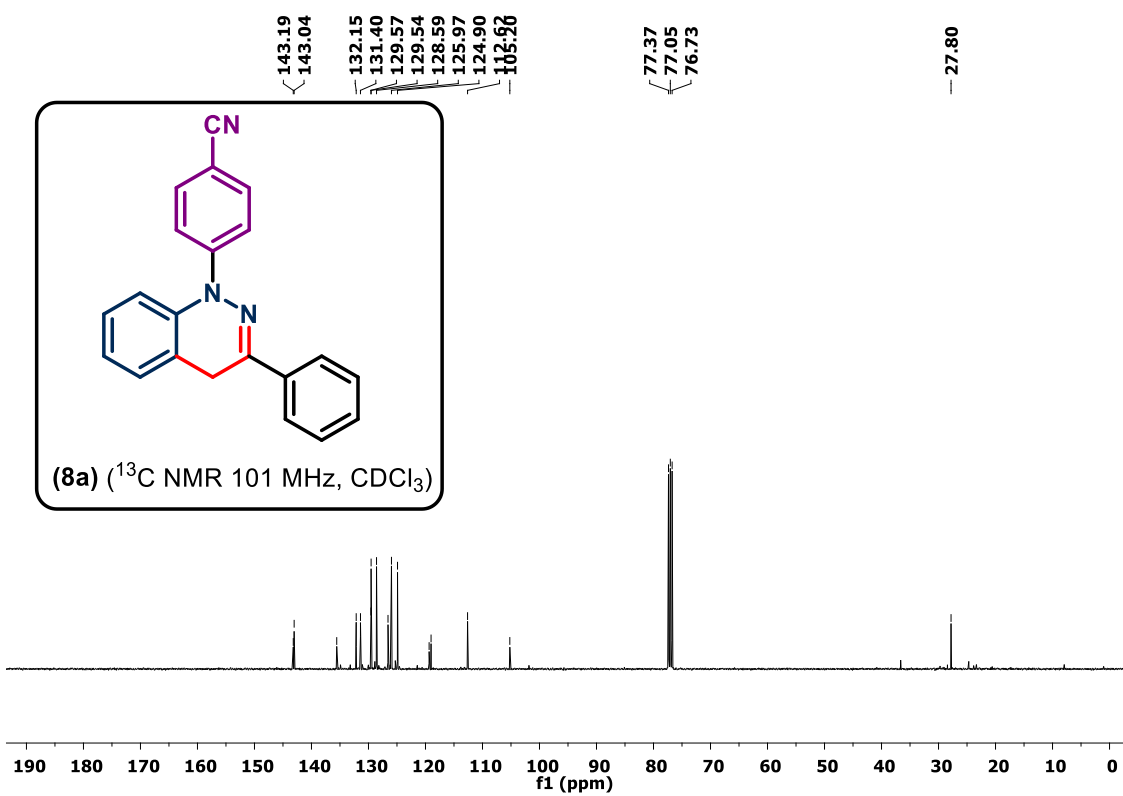



GP-PM-422

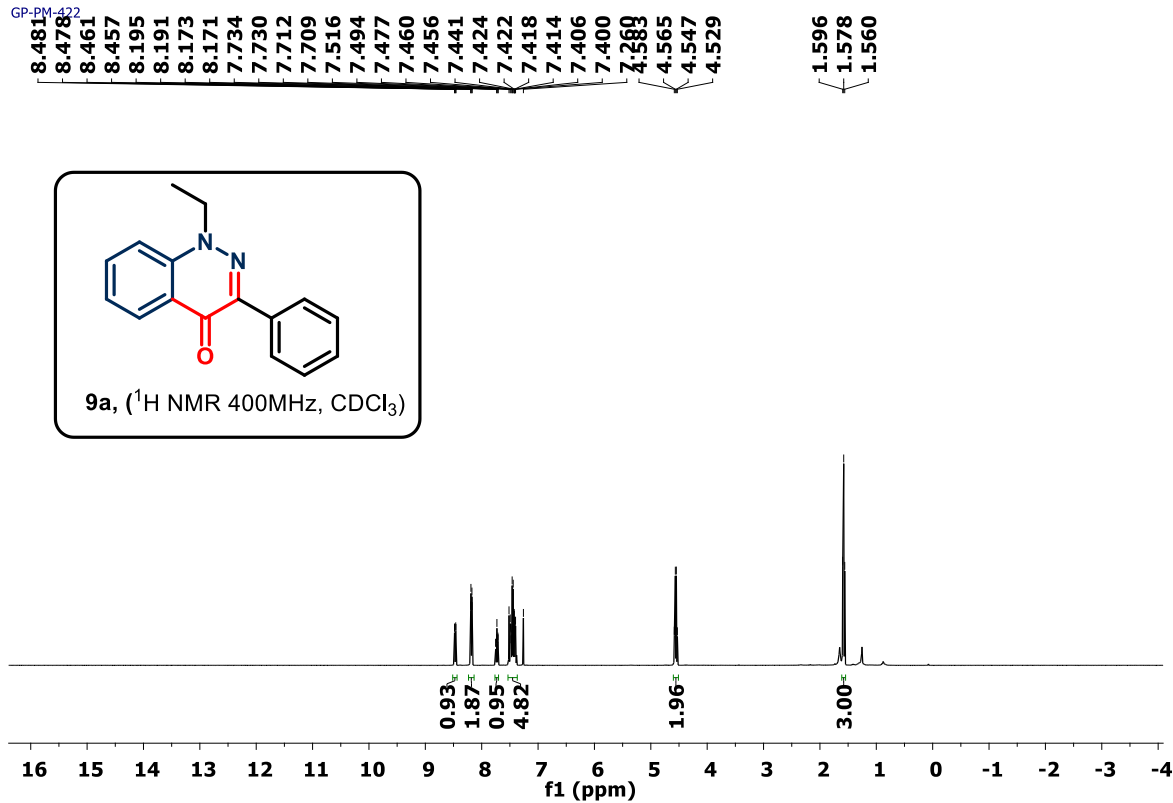

GP-PM-422

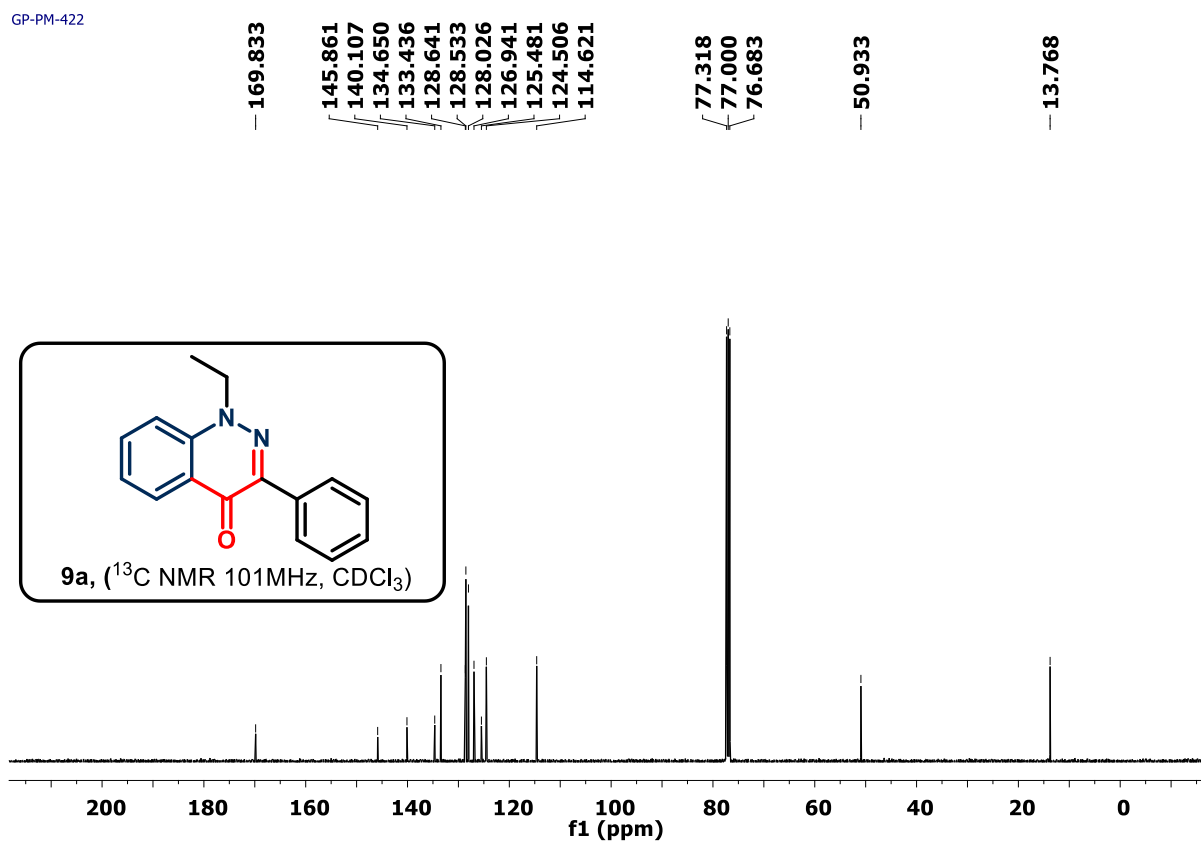

GP-PM-407

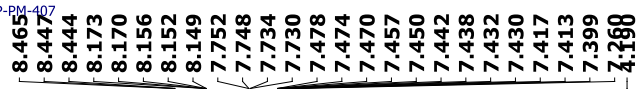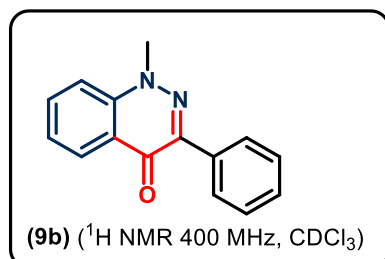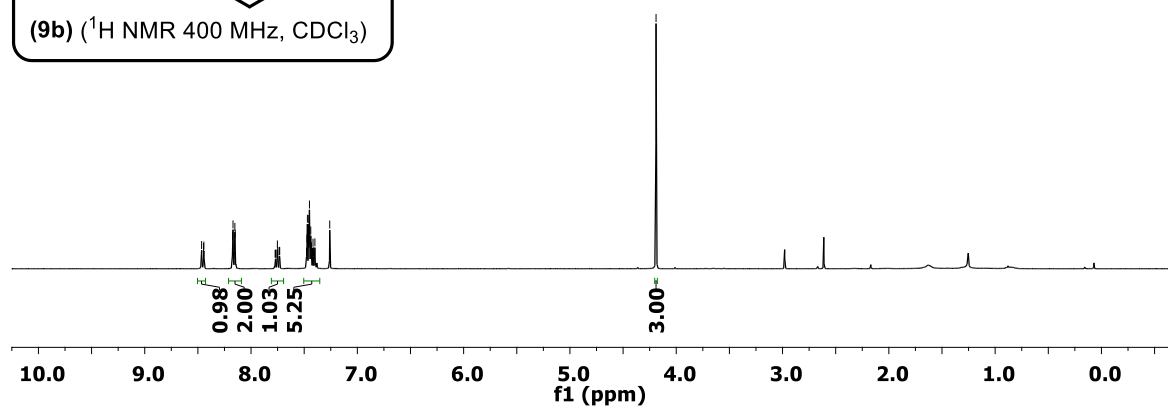

GP-PM-407

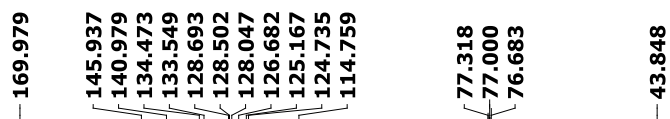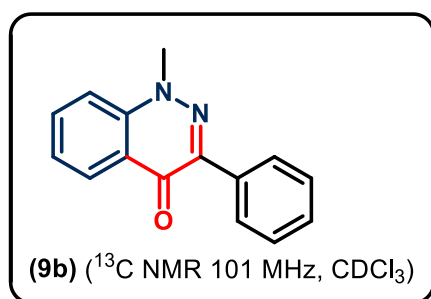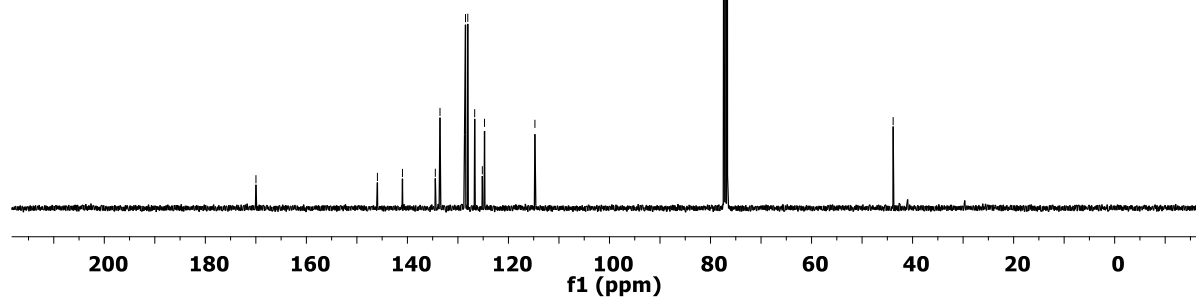

Supplement: d1cc06353g1.pdf [file d1cc06353g1.pdf]
